# Supplementary material for: Human Amniotic Epithelial Stem Cell-Derived Retinal Pigment Epithelium Cells Repair Retinal Degeneration
Source: Frontiers journal article supplement (doi:10.3389/fcell.2021.737242), 2021-09-28
Supplement: Data_Sheet_1.ZIP [file Data_Sheet_1.ZIP]

## Sheet: figure5C
0.0002	0.0002	0.0063	0.0063	0.2	0.2	2	2	6.3	6.3
R	L	R	L	R	L	R	L	R	L
-6.696e-06	-9.957e-06	-2.173e-05	-1.927e-05	-3.099e-05	-2.489e-05	3.609e-06	-9.445e-06	4.82e-05	-3.351e-07
-6.11e-06	-1.054e-05	-2.564e-05	-2.252e-05	-2.865e-05	-2.41e-05	4.195e-06	-9.054e-06	4.95e-05	-9.541e-09
-6.501e-06	-1.054e-05	-2.889e-05	-2.415e-05	-2.806e-05	-2.43e-05	2.828e-06	-1.003e-05	5.081e-05	9.67e-07
-6.11e-06	-1.015e-05	-3.149e-05	-2.61e-05	-2.67e-05	-2.371e-05	6.794e-07	-1.179e-05	5.374e-05	3.571e-06
-6.598e-06	-9.761e-06	-3.312e-05	-2.708e-05	-2.553e-05	-2.235e-05	-1.274e-06	-1.316e-05	5.569e-05	6.826e-06
-6.989e-06	-1.045e-05	-3.41e-05	-2.708e-05	-2.533e-05	-2.157e-05	-4.399e-06	-1.472e-05	5.829e-05	1.073e-05
-7.38e-06	-1.093e-05	-3.508e-05	-2.838e-05	-2.416e-05	-2.137e-05	-5.766e-06	-1.628e-05	6.122e-05	1.366e-05
-8.844e-06	-1.201e-05	-3.508e-05	-2.806e-05	-2.318e-05	-2.157e-05	-5.18e-06	-1.706e-05	6.611e-05	1.594e-05
-1.011e-05	-1.298e-05	-3.442e-05	-2.708e-05	-2.201e-05	-2.039e-05	-5.571e-06	-1.843e-05	6.741e-05	1.692e-05
-1.002e-05	-1.289e-05	-3.312e-05	-2.61e-05	-2.025e-05	-1.942e-05	-5.571e-06	-1.921e-05	6.969e-05	1.692e-05
-9.723e-06	-1.23e-05	-3.149e-05	-2.447e-05	-1.908e-05	-1.883e-05	-4.789e-06	-1.882e-05	6.904e-05	1.659e-05
-1.002e-05	-1.045e-05	-2.857e-05	-2.252e-05	-1.888e-05	-1.864e-05	-5.571e-06	-1.902e-05	6.838e-05	1.757e-05
-9.137e-06	-8.883e-06	-2.629e-05	-2.057e-05	-1.791e-05	-1.844e-05	-4.985e-06	-1.902e-05	6.904e-05	1.985e-05
-8.747e-06	-8.492e-06	-2.531e-05	-2.024e-05	-1.771e-05	-1.844e-05	-3.422e-06	-1.862e-05	6.969e-05	2.115e-05
-7.868e-06	-8.492e-06	-2.498e-05	-2.057e-05	-1.771e-05	-1.844e-05	-3.032e-06	-1.96e-05	7.164e-05	2.343e-05
-7.38e-06	-8.492e-06	-2.564e-05	-2.155e-05	-1.674e-05	-1.746e-05	-3.422e-06	-1.941e-05	7.327e-05	2.375e-05
-7.38e-06	-9.371e-06	-2.629e-05	-2.285e-05	-1.576e-05	-1.707e-05	-2.446e-06	-1.999e-05	7.457e-05	2.375e-05
-6.891e-06	-1.035e-05	-2.531e-05	-2.35e-05	-1.595e-05	-1.688e-05	-3.227e-06	-1.96e-05	7.327e-05	2.343e-05
-6.891e-06	-1.084e-05	-2.694e-05	-2.447e-05	-1.42e-05	-1.746e-05	-3.227e-06	-2.116e-05	7.294e-05	2.31e-05
-7.282e-06	-1.035e-05	-2.824e-05	-2.545e-05	-1.361e-05	-1.707e-05	-2.641e-06	-2.566e-05	7.164e-05	2.343e-05
-7.868e-06	-1.054e-05	-2.987e-05	-2.513e-05	-1.42e-05	-1.844e-05	-4.008e-06	-2.507e-05	7.197e-05	2.701e-05
-8.161e-06	-1.064e-05	-3.117e-05	-2.48e-05	-1.381e-05	-1.942e-05	-4.789e-06	-2.312e-05	7.197e-05	2.961e-05
-8.844e-06	-1.152e-05	-3.149e-05	-2.545e-05	-1.4e-05	-2e-05	-4.203e-06	-2.214e-05	7.131e-05	2.961e-05
-8.649e-06	-1.211e-05	-3.28e-05	-2.708e-05	-1.498e-05	-2.078e-05	-4.985e-06	-2.155e-05	7.066e-05	2.831e-05
-9.04e-06	-1.269e-05	-3.312e-05	-2.871e-05	-1.595e-05	-2.059e-05	-5.18e-06	-2.175e-05	6.904e-05	2.636e-05
-9.333e-06	-1.298e-05	-3.28e-05	-3.033e-05	-1.674e-05	-2.02e-05	-5.571e-06	-2.175e-05	6.611e-05	2.05e-05
-8.844e-06	-1.318e-05	-3.247e-05	-3.131e-05	-1.732e-05	-1.903e-05	-6.938e-06	-2.136e-05	6.155e-05	1.464e-05
-8.649e-06	-1.22e-05	-3.475e-05	-3.196e-05	-1.83e-05	-1.727e-05	-7.524e-06	-2.175e-05	5.699e-05	9.756e-06
-9.43e-06	-1.211e-05	-3.67e-05	-3.131e-05	-1.947e-05	-1.707e-05	-7.524e-06	-2.234e-05	5.016e-05	6.501e-06
-1.011e-05	-1.211e-05	-3.801e-05	-3.001e-05	-2.006e-05	-1.707e-05	-8.696e-06	-2.273e-05	4.332e-05	4.873e-06
-1.05e-05	-1.279e-05	-3.833e-05	-2.74e-05	-1.986e-05	-1.766e-05	-9.672e-06	-2.175e-05	3.713e-05	3.897e-06
-1.09e-05	-1.328e-05	-3.801e-05	-2.382e-05	-1.947e-05	-1.766e-05	-1.123e-05	-2.097e-05	3.095e-05	9.67e-07
-1.002e-05	-1.328e-05	-3.638e-05	-2.317e-05	-1.947e-05	-1.766e-05	-1.455e-05	-2.077e-05	2.542e-05	-3.59e-06
-1.002e-05	-1.308e-05	-3.41e-05	-2.415e-05	-1.947e-05	-1.903e-05	-1.475e-05	-1.96e-05	1.891e-05	-8.799e-06
-1.021e-05	-1.328e-05	-3.117e-05	-2.513e-05	-2.025e-05	-2e-05	-1.436e-05	-1.862e-05	1.207e-05	-1.531e-05
-1.07e-05	-1.279e-05	-2.889e-05	-2.578e-05	-2.123e-05	-1.981e-05	-1.436e-05	-1.823e-05	6.861e-06	-1.954e-05
-1.148e-05	-1.279e-05	-2.759e-05	-2.513e-05	-2.084e-05	-1.981e-05	-1.319e-05	-1.902e-05	2.304e-06	-2.247e-05
-1.197e-05	-1.367e-05	-2.694e-05	-2.447e-05	-2.318e-05	-2.157e-05	-1.475e-05	-1.98e-05	-3.23e-06	-2.41e-05
-1.158e-05	-1.445e-05	-2.694e-05	-2.447e-05	-2.455e-05	-2.235e-05	-1.827e-05	-2.097e-05	-7.462e-06	-2.54e-05
-1.148e-05	-1.425e-05	-2.759e-05	-2.48e-05	-2.553e-05	-2.176e-05	-2.041e-05	-2.234e-05	-1.039e-05	-2.735e-05
-1.168e-05	-1.377e-05	-2.922e-05	-2.545e-05	-2.65e-05	-2.254e-05	-2.295e-05	-2.292e-05	-1.104e-05	-2.963e-05
-1.129e-05	-1.308e-05	-3.182e-05	-2.578e-05	-2.709e-05	-2.235e-05	-2.373e-05	-2.273e-05	-7.462e-06	-3.159e-05
-1.109e-05	-1.347e-05	-3.345e-05	-2.675e-05	-2.689e-05	-2.196e-05	-2.022e-05	-2.116e-05	-1.277e-06	-3.028e-05
-1.09e-05	-1.308e-05	-3.605e-05	-2.773e-05	-2.748e-05	-2.235e-05	-1.416e-05	-1.784e-05	1.142e-05	-2.605e-05
-9.333e-06	-1.201e-05	-3.801e-05	-2.806e-05	-2.787e-05	-2.215e-05	-6.352e-06	-1.374e-05	2.769e-05	-1.824e-05
-8.844e-06	-1.171e-05	-4.028e-05	-2.773e-05	-2.865e-05	-2.157e-05	2.828e-06	-1.023e-05	4.202e-05	-1.205e-05
-8.063e-06	-1.181e-05	-4.159e-05	-2.806e-05	-2.963e-05	-2.098e-05	8.492e-06	-8.468e-06	5.048e-05	-9.124e-06
-7.673e-06	-1.191e-05	-4.126e-05	-2.74e-05	-2.787e-05	-1.981e-05	1.123e-05	-8.664e-06	5.243e-05	-1.01e-05
-8.063e-06	-1.152e-05	-4.093e-05	-2.773e-05	-2.65e-05	-1.981e-05	1.123e-05	-9.445e-06	5.113e-05	-1.27e-05
-8.747e-06	-1.132e-05	-4.126e-05	-2.806e-05	-2.474e-05	-1.766e-05	7.906e-06	-1.12e-05	4.592e-05	-1.401e-05
-9.43e-06	-1.113e-05	-4.028e-05	-2.903e-05	-2.201e-05	-1.649e-05	3.414e-06	-1.374e-05	4.137e-05	-1.368e-05
-9.821e-06	-1.152e-05	-3.833e-05	-2.871e-05	-1.908e-05	-1.434e-05	1.265e-06	-1.472e-05	4.039e-05	-1.14e-05
-1.138e-05	-1.24e-05	-3.605e-05	-2.74e-05	-1.654e-05	-1.297e-05	-1.469e-06	-1.413e-05	4.625e-05	-3.265e-06
-1.207e-05	-1.337e-05	-3.377e-05	-2.773e-05	-1.381e-05	-1.258e-05	4.841e-07	-1.042e-05	5.96e-05	8.128e-06
-1.353e-05	-1.484e-05	-3.28e-05	-2.806e-05	-1.146e-05	-1.18e-05	7.711e-06	-5.148e-06	7.848e-05	1.952e-05
-1.412e-05	-1.621e-05	-3.149e-05	-2.708e-05	-9.119e-06	-1.219e-05	2.021e-05	-6.557e-07	0.0001003	2.799e-05
-1.412e-05	-1.728e-05	-3.149e-05	-2.871e-05	-6.58e-06	-1.375e-05	3.545e-05	2.079e-06	0.0001159	2.994e-05
-1.48e-05	-1.787e-05	-3.215e-05	-3.033e-05	-4.236e-06	-1.492e-05	4.873e-05	1.883e-06	0.0001227	2.636e-05
-1.578e-05	-1.787e-05	-3.345e-05	-3.099e-05	-2.478e-06	-1.434e-05	5.361e-05	-2.414e-06	0.0001172	2.213e-05
-1.636e-05	-1.718e-05	-3.67e-05	-3.196e-05	-3.3e-07	-1.16e-05	5.185e-05	-7.882e-06	0.0001074	2.18e-05
-1.734e-05	-1.718e-05	-3.963e-05	-3.457e-05	1.233e-06	-8.674e-06	4.462e-05	-1.198e-05	9.866e-05	2.571e-05
-1.744e-05	-1.796e-05	-4.321e-05	-3.684e-05	3.772e-06	-5.549e-06	3.545e-05	-1.198e-05	9.41e-05	3.222e-05
-1.715e-05	-1.836e-05	-4.614e-05	-3.847e-05	8.85e-06	-1.643e-06	2.92e-05	-7.687e-06	9.703e-05	4.036e-05
-1.695e-05	-1.865e-05	-4.907e-05	-3.945e-05	1.432e-05	-8.068e-08	2.783e-05	-1.828e-06	0.0001071	4.817e-05
-1.578e-05	-1.757e-05	-5.07e-05	-4.14e-05	1.979e-05	-1.057e-06	3.017e-05	4.813e-06	0.0001247	5.5e-05
-1.539e-05	-1.65e-05	-5.363e-05	-4.335e-05	2.565e-05	-2.62e-06	3.994e-05	9.305e-06	0.0001433	5.956e-05
-1.48e-05	-1.552e-05	-5.493e-05	-4.27e-05	2.994e-05	-3.01e-06	5.283e-05	1.048e-05	0.0001566	6.282e-05
-1.392e-05	-1.484e-05	-5.33e-05	-4.205e-05	3.072e-05	-1.838e-06	6.181e-05	8.915e-06	0.0001651	6.314e-05
-1.324e-05	-1.337e-05	-5.2e-05	-4.238e-05	2.975e-05	1.091e-06	6.689e-05	4.813e-06	0.0001677	6.249e-05
-1.275e-05	-1.308e-05	-5.037e-05	-4.108e-05	2.838e-05	3.435e-06	6.865e-05	-6.98e-08	0.0001631	6.282e-05
-1.236e-05	-1.328e-05	-4.842e-05	-4.043e-05	2.955e-05	6.365e-06	6.591e-05	-3.585e-06	0.0001556	6.575e-05
-1.226e-05	-1.386e-05	-4.614e-05	-3.945e-05	3.229e-05	1.027e-05	6.142e-05	-3.195e-06	0.0001481	7.193e-05
-1.304e-05	-1.474e-05	-4.386e-05	-3.88e-05	3.893e-05	1.34e-05	5.556e-05	5.161e-07	0.0001442	7.974e-05
-1.334e-05	-1.484e-05	-4.191e-05	-3.782e-05	4.674e-05	1.633e-05	5.322e-05	6.766e-06	0.0001494	8.625e-05
-1.412e-05	-1.552e-05	-4.126e-05	-3.88e-05	5.651e-05	1.789e-05	5.693e-05	1.536e-05	0.0001628	9.114e-05
-1.558e-05	-1.65e-05	-3.996e-05	-4.01e-05	6.451e-05	2.082e-05	6.22e-05	2.22e-05	0.0001761	9.309e-05
-1.597e-05	-1.621e-05	-3.866e-05	-4.01e-05	7.057e-05	2.551e-05	6.962e-05	2.571e-05	0.0001895	9.276e-05
-1.695e-05	-1.582e-05	-3.931e-05	-4.043e-05	7.643e-05	2.922e-05	7.822e-05	2.669e-05	0.0001992	9.179e-05
-1.841e-05	-1.67e-05	-3.931e-05	-4.27e-05	7.936e-05	3.156e-05	8.505e-05	2.513e-05	0.0002035	9.016e-05
-1.9e-05	-1.709e-05	-3.996e-05	-4.368e-05	8.092e-05	3.215e-05	9.013e-05	2.317e-05	0.0002025	8.788e-05
-1.929e-05	-1.738e-05	-4.061e-05	-4.466e-05	8.151e-05	3.195e-05	9.345e-05	2.044e-05	0.0001976	8.528e-05
-1.92e-05	-1.806e-05	-4.093e-05	-4.563e-05	8.268e-05	3.176e-05	9.345e-05	1.79e-05	0.0001895	8.202e-05
-1.822e-05	-1.796e-05	-4.159e-05	-4.531e-05	8.463e-05	3.078e-05	8.994e-05	1.536e-05	0.0001817	7.942e-05
-1.734e-05	-1.679e-05	-4.126e-05	-4.498e-05	8.619e-05	3.136e-05	8.525e-05	1.536e-05	0.0001745	7.909e-05
-1.607e-05	-1.65e-05	-4.191e-05	-4.563e-05	8.854e-05	3.312e-05	8.037e-05	1.673e-05	0.0001696	8.039e-05
-1.48e-05	-1.63e-05	-4.159e-05	-4.531e-05	9.127e-05	3.468e-05	7.822e-05	1.946e-05	0.0001703	8.3e-05
-1.431e-05	-1.66e-05	-4.126e-05	-4.433e-05	9.518e-05	3.781e-05	7.88e-05	2.2e-05	0.0001739	8.528e-05
-1.353e-05	-1.699e-05	-4.093e-05	-4.27e-05	9.811e-05	4.191e-05	8.134e-05	2.552e-05	0.0001794	8.821e-05
-1.285e-05	-1.796e-05	-4.028e-05	-4.14e-05	0.0001024	4.465e-05	8.779e-05	2.962e-05	0.0001875	9.081e-05
-1.256e-05	-1.855e-05	-3.833e-05	-3.977e-05	0.0001063	4.601e-05	9.619e-05	3.391e-05	0.000197	9.309e-05
-1.285e-05	-1.943e-05	-3.442e-05	-3.88e-05	0.0001094	4.699e-05	0.000102	3.645e-05	0.0002045	9.439e-05
-1.343e-05	-1.943e-05	-3.019e-05	-3.684e-05	0.0001137	4.758e-05	0.0001075	3.782e-05	0.0002113	9.374e-05
-1.461e-05	-1.953e-05	-2.629e-05	-3.554e-05	0.0001171	4.679e-05	0.0001116	3.782e-05	0.0002139	9.016e-05
-1.529e-05	-1.894e-05	-2.205e-05	-3.391e-05	0.0001192	4.445e-05	0.0001136	3.626e-05	0.0002139	8.69e-05
-1.568e-05	-1.816e-05	-1.75e-05	-3.294e-05	0.0001208	4.367e-05	0.0001147	3.411e-05	0.0002136	8.332e-05
-1.675e-05	-1.845e-05	-1.392e-05	-3.229e-05	0.0001206	4.23e-05	0.0001149	3.177e-05	0.00021	8.072e-05
-1.773e-05	-1.953e-05	-1.066e-05	-3.001e-05	0.0001188	4.093e-05	0.0001138	2.923e-05	0.0002067	8.007e-05
-1.861e-05	-2.041e-05	-8.383e-06	-2.675e-05	0.000118	4.133e-05	0.000114	2.669e-05	0.0002035	8.007e-05
-1.9e-05	-2.031e-05	-5.779e-06	-2.643e-05	0.0001172	4.211e-05	0.0001145	2.552e-05	0.0002005	7.909e-05
-1.91e-05	-1.982e-05	-3.5e-06	-2.643e-05	0.0001178	4.445e-05	0.000113	2.395e-05	0.000197	7.681e-05
-1.91e-05	-1.992e-05	-3.826e-06	-2.513e-05	0.0001188	4.66e-05	0.0001126	2.298e-05	0.0001963	7.616e-05
-1.978e-05	-2.041e-05	-3.5e-06	-2.415e-05	0.0001196	4.797e-05	0.000112	2.298e-05	0.0001953	7.453e-05
-1.959e-05	-2.138e-05	-3.174e-06	-2.415e-05	0.0001212	4.855e-05	0.0001102	2.356e-05	0.000195	7.291e-05
-1.929e-05	-2.226e-05	-3.174e-06	-2.35e-05	0.0001241	4.914e-05	0.0001104	2.434e-05	0.000195	7.193e-05
-1.988e-05	-2.363e-05	-1.872e-06	-2.187e-05	0.0001258	4.836e-05	0.0001104	2.552e-05	0.0001947	7.193e-05
-1.92e-05	-2.314e-05	4.063e-07	-2.155e-05	0.0001278	4.758e-05	0.0001102	2.688e-05	0.000196	7.421e-05
-1.89e-05	-2.275e-05	2.034e-06	-2.089e-05	0.0001288	4.718e-05	0.0001114	2.708e-05	0.0001983	7.649e-05
-1.89e-05	-2.168e-05	3.987e-06	-1.992e-05	0.0001294	4.699e-05	0.000114	2.669e-05	0.0001999	7.812e-05
-1.871e-05	-2.05e-05	5.94e-06	-1.764e-05	0.0001296	4.718e-05	0.0001161	2.61e-05	0.0002015	7.844e-05
-1.793e-05	-1.962e-05	6.266e-06	-1.634e-05	0.0001297	4.66e-05	0.000119	2.688e-05	0.0002048	7.649e-05
-1.734e-05	-2.089e-05	8.544e-06	-1.699e-05	0.0001288	4.523e-05	0.00012	2.688e-05	0.0002064	7.453e-05
-1.666e-05	-2.285e-05	1.147e-05	-1.959e-05	0.000129	4.445e-05	0.0001212	2.571e-05	0.0002093	7.388e-05
-1.636e-05	-2.334e-05	1.343e-05	-2.024e-05	0.0001296	4.406e-05	0.0001231	2.532e-05	0.000211	7.421e-05
-1.588e-05	-2.304e-05	1.343e-05	-1.862e-05	0.0001288	4.308e-05	0.0001247	2.434e-05	0.000211	7.486e-05
-1.461e-05	-2.226e-05	1.538e-05	-1.764e-05	0.0001294	4.23e-05	0.0001255	2.434e-05	0.0002113	7.519e-05
-1.441e-05	-2.099e-05	1.571e-05	-1.731e-05	0.0001297	4.172e-05	0.0001269	2.454e-05	0.00021	7.453e-05
-1.49e-05	-1.972e-05	1.668e-05	-1.666e-05	0.0001307	4.191e-05	0.0001259	2.493e-05	0.0002074	7.291e-05
-1.48e-05	-1.806e-05	1.994e-05	-1.536e-05	0.0001325	4.211e-05	0.0001243	2.454e-05	0.0002045	6.802e-05
-1.519e-05	-1.738e-05	2.157e-05	-1.406e-05	0.000135	4.25e-05	0.0001247	2.454e-05	0.0002025	6.347e-05
-1.509e-05	-1.679e-05	2.547e-05	-1.406e-05	0.000136	4.152e-05	0.0001247	2.298e-05	0.0001986	6.086e-05
-1.382e-05	-1.63e-05	2.808e-05	-1.276e-05	0.0001356	4.172e-05	0.0001243	2.181e-05	0.0001973	6.151e-05
-1.246e-05	-1.621e-05	2.873e-05	-1.145e-05	0.0001348	4.191e-05	0.0001239	2.141e-05	0.0001963	6.379e-05
-1.011e-05	-1.484e-05	2.775e-05	-9.501e-06	0.0001335	4.25e-05	0.0001233	2.161e-05	0.000195	6.542e-05
-7.673e-06	-1.23e-05	2.742e-05	-9.175e-06	0.0001325	4.426e-05	0.0001241	2.239e-05	0.0001931	6.379e-05
-6.501e-06	-9.468e-06	2.71e-05	-8.85e-06	0.0001331	4.621e-05	0.0001249	2.356e-05	0.0001905	6.151e-05
-5.231e-06	-7.808e-06	2.645e-05	-9.175e-06	0.0001337	4.601e-05	0.0001237	2.395e-05	0.0001879	5.858e-05
-3.962e-06	-6.343e-06	2.515e-05	-8.85e-06	0.0001337	4.484e-05	0.0001227	2.434e-05	0.0001869	5.728e-05
-3.376e-06	-5.562e-06	2.58e-05	-7.873e-06	0.000134	4.269e-05	0.0001212	2.376e-05	0.0001852	5.826e-05
-2.399e-06	-4.586e-06	2.71e-05	-8.524e-06	0.0001338	4.152e-05	0.000119	2.239e-05	0.0001852	6.021e-05
-1.227e-06	-4.195e-06	2.775e-05	-8.85e-06	0.0001342	4.035e-05	0.0001173	2.083e-05	0.0001865	6.054e-05
-3.483e-07	-3.804e-06	3.003e-05	-9.501e-06	0.0001325	3.937e-05	0.0001167	1.946e-05	0.0001879	5.989e-05
7.259e-07	-3.121e-06	3.133e-05	-9.826e-06	0.0001307	3.879e-05	0.0001153	1.927e-05	0.0001872	5.891e-05
1.898e-06	-1.168e-06	3.296e-05	-9.175e-06	0.0001296	3.781e-05	0.0001149	2.044e-05	0.0001856	5.696e-05
2.777e-06	-8.747e-07	3.524e-05	-8.524e-06	0.0001292	3.761e-05	0.0001149	2.024e-05	0.0001833	5.5e-05
2.777e-06	-5.817e-07	3.849e-05	-6.246e-06	0.000128	3.742e-05	0.0001134	2.063e-05	0.0001817	5.37e-05
2.874e-06	4.197e-09	4.142e-05	-4.292e-06	0.0001278	3.742e-05	0.0001132	1.985e-05	0.0001794	5.533e-05
2.484e-06	-2.888e-07	4.272e-05	-3.316e-06	0.0001278	3.664e-05	0.0001118	1.848e-05	0.0001758	5.631e-05
3.265e-06	-1.911e-07	4.435e-05	-2.665e-06	0.0001268	3.547e-05	0.0001097	1.556e-05	0.0001722	5.598e-05
4.242e-06	7.854e-07	4.468e-05	-3.641e-06	0.0001272	3.488e-05	0.0001087	1.419e-05	0.0001693	5.24e-05
4.632e-06	2.348e-06	4.5e-05	-5.92e-06	0.0001253	3.312e-05	0.0001075	1.321e-05	0.0001647	4.719e-05
5.902e-06	3.715e-06	4.63e-05	-6.571e-06	0.0001241	3.097e-05	0.0001046	1.282e-05	0.0001589	4.003e-05
5.902e-06	4.789e-06	4.826e-05	-4.944e-06	0.0001231	2.902e-05	0.0001036	1.302e-05	0.0001553	3.482e-05
5.511e-06	4.985e-06	5.054e-05	-2.339e-06	0.0001204	2.57e-05	0.0001022	1.302e-05	0.0001524	3.157e-05
6.097e-06	4.008e-06	5.249e-05	-1.037e-06	0.0001174	2.316e-05	9.97e-05	1.184e-05	0.0001504	3.287e-05
6.292e-06	3.227e-06	5.412e-05	-3.862e-07	0.0001157	2.101e-05	9.873e-05	1.028e-05	0.0001494	3.319e-05
6.39e-06	3.422e-06	5.347e-05	-3.862e-07	0.0001124	1.906e-05	9.638e-05	9.11e-06	0.0001468	3.417e-05
7.464e-06	5.082e-06	5.184e-05	-2.665e-06	0.0001088	1.769e-05	9.384e-05	8.133e-06	0.0001465	3.45e-05
8.441e-06	6.157e-06	4.826e-05	-6.571e-06	0.0001061	1.672e-05	9.189e-05	7.938e-06	0.0001429	3.482e-05
8.538e-06	5.961e-06	4.5e-05	-8.199e-06	0.000102	1.593e-05	8.837e-05	8.329e-06	0.0001397	3.352e-05
9.027e-06	5.473e-06	4.207e-05	-9.501e-06	9.83e-05	1.457e-05	8.545e-05	1.009e-05	0.0001361	3.059e-05
9.027e-06	5.668e-06	3.914e-05	-8.85e-06	9.518e-05	1.32e-05	8.408e-05	1.067e-05	0.0001348	2.799e-05
8.05e-06	5.766e-06	3.947e-05	-6.897e-06	9.244e-05	1.105e-05	8.212e-05	9.11e-06	0.0001332	2.766e-05
6.781e-06	5.668e-06	3.947e-05	-7.222e-06	9.03e-05	1.027e-05	7.998e-05	6.376e-06	0.0001335	2.994e-05
5.511e-06	5.082e-06	4.012e-05	-7.548e-06	8.795e-05	9.685e-06	7.9e-05	4.422e-06	0.0001335	3.319e-05
4.144e-06	4.789e-06	4.11e-05	-8.85e-06	8.365e-05	8.708e-06	7.685e-05	2.86e-06	0.0001322	3.319e-05
4.535e-06	5.766e-06	4.338e-05	-1.145e-05	8.092e-05	7.927e-06	7.47e-05	2.079e-06	0.0001309	3.091e-05
4.144e-06	6.547e-06	4.5e-05	-1.406e-05	7.936e-05	7.341e-06	7.392e-05	2.665e-06	0.0001293	2.733e-05
4.046e-06	6.352e-06	4.663e-05	-1.634e-05	7.74e-05	5.583e-06	7.197e-05	2.469e-06	0.0001273	2.538e-05
4.339e-06	5.766e-06	4.761e-05	-1.601e-05	7.584e-05	5.388e-06	6.982e-05	2.469e-06	0.0001254	2.538e-05
4.535e-06	4.887e-06	4.793e-05	-1.536e-05	7.408e-05	6.169e-06	6.904e-05	1.688e-06	0.0001234	2.701e-05
4.827e-06	4.301e-06	4.923e-05	-1.341e-05	7.135e-05	6.169e-06	6.65e-05	3.208e-07	0.0001188	2.831e-05
5.413e-06	4.399e-06	5.119e-05	-1.21e-05	6.862e-05	6.169e-06	6.357e-05	-2.023e-06	0.000114	2.766e-05
5.511e-06	4.008e-06	5.249e-05	-8.85e-06	6.627e-05	4.607e-06	6.103e-05	-3.976e-06	0.0001094	2.44e-05
5.999e-06	3.422e-06	5.444e-05	-4.618e-06	6.295e-05	3.24e-06	5.634e-05	-7.101e-06	0.0001058	1.985e-05
6.585e-06	3.52e-06	5.477e-05	-1.688e-06	6.08e-05	1.677e-06	5.263e-05	-8.273e-06	0.0001032	1.627e-05
6.488e-06	3.227e-06	5.412e-05	9.158e-07	5.748e-05	1.091e-06	4.97e-05	-8.664e-06	0.0001013	1.529e-05
6.488e-06	2.739e-06	5.444e-05	3.194e-06	5.397e-05	5.053e-07	4.638e-05	-9.249e-06	9.996e-05	1.594e-05
6.39e-06	2.153e-06	5.477e-05	5.473e-06	5.24e-05	-8.068e-08	4.423e-05	-9.835e-06	0.0001003	1.757e-05
5.609e-06	1.274e-06	5.509e-05	7.101e-06	5.084e-05	1.146e-07	4.267e-05	-9.445e-06	9.833e-05	1.789e-05
5.023e-06	1.078e-06	5.607e-05	8.728e-06	4.791e-05	-6.666e-07	4.033e-05	-9.64e-06	9.508e-05	1.789e-05
5.12e-06	1.371e-06	5.77e-05	1.166e-05	4.635e-05	-4.713e-07	3.916e-05	-8.859e-06	9.345e-05	1.627e-05
4.339e-06	2.055e-06	6.128e-05	1.459e-05	4.44e-05	3.099e-07	3.779e-05	-7.687e-06	9.182e-05	1.431e-05
4.339e-06	2.348e-06	6.551e-05	1.687e-05	4.381e-05	1.677e-06	3.447e-05	-6.906e-06	9.117e-05	1.366e-05
3.363e-06	2.348e-06	6.779e-05	1.882e-05	4.303e-05	2.458e-06	3.212e-05	-6.124e-06	9.312e-05	1.627e-05
1.995e-06	1.957e-06	7.039e-05	2.077e-05	4.205e-05	3.435e-06	2.959e-05	-5.539e-06	9.378e-05	2.18e-05
1.507e-06	1.957e-06	7.397e-05	2.37e-05	4.049e-05	4.021e-06	2.724e-05	-5.734e-06	9.378e-05	2.44e-05
1.117e-06	1.664e-06	7.625e-05	2.696e-05	3.99e-05	4.997e-06	2.744e-05	-7.296e-06	9.085e-05	2.701e-05
3.353e-07	2.972e-07	7.853e-05	2.728e-05	3.893e-05	6.365e-06	2.646e-05	-9.054e-06	8.531e-05	2.668e-05
-5.531e-08	-1.363e-06	8.016e-05	2.761e-05	3.854e-05	7.732e-06	2.412e-05	-1.12e-05	8.108e-05	2.375e-05
-1.13e-06	-2.242e-06	8.016e-05	2.598e-05	3.912e-05	8.708e-06	2.451e-05	-1.218e-05	7.88e-05	2.082e-05
-2.79e-06	-3.511e-06	7.886e-05	2.533e-05	3.756e-05	9.099e-06	2.412e-05	-1.159e-05	7.587e-05	1.855e-05
-4.059e-06	-4.195e-06	7.69e-05	2.533e-05	3.795e-05	9.294e-06	2.295e-05	-1.101e-05	7.359e-05	1.757e-05
-4.743e-06	-4.293e-06	7.267e-05	2.533e-05	3.756e-05	1.027e-05	2.138e-05	-1.12e-05	7.327e-05	1.887e-05
-5.622e-06	-4.586e-06	6.877e-05	2.435e-05	3.58e-05	1.027e-05	1.865e-05	-1.198e-05	7.066e-05	1.887e-05
-6.11e-06	-4.781e-06	6.584e-05	2.37e-05	3.444e-05	1.066e-05	1.552e-05	-1.277e-05	6.838e-05	1.887e-05
-5.915e-06	-4.488e-06	6.193e-05	2.207e-05	3.326e-05	1.144e-05	1.396e-05	-1.335e-05	6.513e-05	1.724e-05
-6.305e-06	-4.879e-06	5.737e-05	2.11e-05	3.072e-05	1.105e-05	9.859e-06	-1.316e-05	6.187e-05	1.399e-05
-6.501e-06	-4.586e-06	5.347e-05	2.012e-05	2.799e-05	1.086e-05	6.929e-06	-1.159e-05	6.025e-05	1.106e-05
-7.673e-06	-4.39e-06	5.086e-05	1.915e-05	2.682e-05	1.086e-05	5.172e-06	-1.062e-05	5.927e-05	8.454e-06
-7.868e-06	-4.879e-06	4.923e-05	1.817e-05	2.545e-05	1.047e-05	1.461e-06	-1.14e-05	5.862e-05	7.803e-06
-8.161e-06	-5.074e-06	4.858e-05	1.556e-05	2.447e-05	1.086e-05	-2.25e-06	-1.394e-05	5.829e-05	9.431e-06
-8.258e-06	-5.465e-06	4.696e-05	1.263e-05	2.252e-05	1.164e-05	-5.18e-06	-1.648e-05	5.927e-05	1.236e-05
-8.356e-06	-5.269e-06	4.761e-05	1.231e-05	2.096e-05	1.242e-05	-9.282e-06	-1.999e-05	5.927e-05	1.464e-05
-8.161e-06	-5.66e-06	4.793e-05	1.198e-05	1.862e-05	1.203e-05	-1.377e-05	-2.39e-05	5.96e-05	1.562e-05
-8.356e-06	-6.441e-06	4.761e-05	1.361e-05	1.627e-05	1.125e-05	-1.729e-05	-2.8e-05	5.797e-05	1.529e-05
-9.43e-06	-6.734e-06	4.826e-05	1.687e-05	1.237e-05	9.88e-06	-2.159e-05	-3.132e-05	5.504e-05	1.334e-05
-9.626e-06	-7.32e-06	4.761e-05	2.045e-05	8.459e-06	6.755e-06	-2.51e-05	-3.405e-05	5.276e-05	1.203e-05
-1.09e-05	-7.711e-06	4.63e-05	2.175e-05	5.725e-06	3.24e-06	-2.803e-05	-3.64e-05	4.788e-05	1.073e-05
-1.197e-05	-8.687e-06	4.565e-05	2.207e-05	2.99e-06	3.099e-07	-3.116e-05	-3.933e-05	4.364e-05	1.041e-05
-1.197e-05	-8.883e-06	4.663e-05	1.915e-05	2.56e-07	-1.643e-06	-3.389e-05	-4.089e-05	3.779e-05	9.756e-06
-1.256e-05	-1.025e-05	4.63e-05	1.654e-05	-2.478e-06	-3.401e-06	-3.565e-05	-4.187e-05	3.225e-05	1.008e-05
-1.295e-05	-1.152e-05	4.826e-05	1.719e-05	-6.385e-06	-5.745e-06	-3.916e-05	-4.382e-05	2.607e-05	9.431e-06
-1.304e-05	-1.279e-05	4.826e-05	1.882e-05	-9.314e-06	-7.112e-06	-4.327e-05	-4.558e-05	2.249e-05	7.152e-06
-1.353e-05	-1.347e-05	4.728e-05	2.077e-05	-1.322e-05	-9.26e-06	-4.678e-05	-4.714e-05	1.891e-05	3.571e-06
-1.422e-05	-1.377e-05	4.598e-05	2.045e-05	-1.752e-05	-1.16e-05	-5.225e-05	-5.007e-05	1.598e-05	2.595e-06
-1.509e-05	-1.377e-05	4.338e-05	1.849e-05	-2.103e-05	-1.395e-05	-5.616e-05	-5.183e-05	1.532e-05	4.548e-06
-1.685e-05	-1.435e-05	4.11e-05	1.524e-05	-2.611e-05	-1.649e-05	-5.909e-05	-5.339e-05	1.5e-05	7.152e-06
-1.763e-05	-1.494e-05	3.817e-05	1.329e-05	-3.217e-05	-1.864e-05	-6.221e-05	-5.515e-05	1.5e-05	9.431e-06
-1.822e-05	-1.543e-05	3.393e-05	1.329e-05	-3.627e-05	-2.078e-05	-6.475e-05	-5.632e-05	1.37e-05	1.008e-05
-1.939e-05	-1.582e-05	3.101e-05	1.524e-05	-4.037e-05	-2.371e-05	-6.651e-05	-5.71e-05	1.207e-05	9.105e-06
-1.968e-05	-1.611e-05	2.97e-05	1.752e-05	-4.486e-05	-2.664e-05	-7.022e-05	-5.886e-05	8.814e-06	7.477e-06
-1.89e-05	-1.552e-05	2.873e-05	1.882e-05	-4.76e-05	-2.821e-05	-7.198e-05	-6.023e-05	7.838e-06	5.85e-06
-1.832e-05	-1.572e-05	2.808e-05	1.947e-05	-5.072e-05	-2.996e-05	-7.354e-05	-6.159e-05	5.233e-06	4.873e-06
-1.802e-05	-1.621e-05	2.905e-05	2.012e-05	-5.345e-05	-3.153e-05	-7.569e-05	-6.237e-05	3.931e-06	3.571e-06
-1.783e-05	-1.572e-05	2.97e-05	1.98e-05	-5.482e-05	-3.348e-05	-7.51e-05	-6.237e-05	4.257e-06	3.246e-06
-1.793e-05	-1.591e-05	3.101e-05	2.012e-05	-5.638e-05	-3.485e-05	-7.471e-05	-6.023e-05	2.955e-06	1.944e-06
-1.822e-05	-1.591e-05	3.166e-05	2.142e-05	-5.795e-05	-3.602e-05	-7.452e-05	-5.827e-05	2.304e-06	1.618e-06
-1.929e-05	-1.67e-05	3.101e-05	2.24e-05	-6.01e-05	-3.719e-05	-7.295e-05	-5.612e-05	1.002e-06	6.415e-07
-2.056e-05	-1.709e-05	3.101e-05	2.045e-05	-6.185e-05	-3.778e-05	-7.315e-05	-5.515e-05	-2.254e-06	-1.637e-06
-2.047e-05	-1.757e-05	3.035e-05	1.849e-05	-6.303e-05	-3.797e-05	-7.452e-05	-5.456e-05	-5.183e-06	-4.567e-06
-2.154e-05	-1.836e-05	2.84e-05	1.491e-05	-6.322e-05	-3.836e-05	-7.413e-05	-5.398e-05	-7.136e-06	-5.543e-06
-2.291e-05	-1.904e-05	2.742e-05	1.101e-05	-6.517e-05	-3.797e-05	-7.393e-05	-5.456e-05	-9.089e-06	-4.892e-06
-2.349e-05	-1.875e-05	2.71e-05	8.077e-06	-6.654e-05	-3.758e-05	-7.354e-05	-5.554e-05	-9.415e-06	-4.241e-06
-2.379e-05	-1.826e-05	2.645e-05	6.45e-06	-6.693e-05	-3.797e-05	-7.198e-05	-5.417e-05	-9.741e-06	-2.288e-06
-2.418e-05	-1.738e-05	2.547e-05	7.101e-06	-6.791e-05	-3.914e-05	-7.159e-05	-5.241e-05	-1.137e-05	-2.288e-06
-2.291e-05	-1.621e-05	2.319e-05	7.752e-06	-6.849e-05	-3.934e-05	-7.178e-05	-5.144e-05	-1.3e-05	-3.59e-06
-2.242e-05	-1.494e-05	1.929e-05	1.036e-05	-6.849e-05	-3.895e-05	-7.022e-05	-5.105e-05	-1.625e-05	-4.892e-06
-2.281e-05	-1.357e-05	1.636e-05	1.068e-05	-6.928e-05	-3.856e-05	-6.983e-05	-5.085e-05	-1.886e-05	-6.194e-06
-2.252e-05	-1.22e-05	1.538e-05	9.054e-06	-6.908e-05	-3.739e-05	-6.905e-05	-5.046e-05	-1.983e-05	-5.543e-06
-2.242e-05	-1.191e-05	1.408e-05	8.077e-06	-6.908e-05	-3.641e-05	-6.866e-05	-4.929e-05	-1.951e-05	-3.916e-06
-2.144e-05	-1.23e-05	1.31e-05	7.426e-06	-7.006e-05	-3.563e-05	-7.041e-05	-4.851e-05	-1.82e-05	-1.312e-06
-1.988e-05	-1.152e-05	1.18e-05	7.752e-06	-7.025e-05	-3.446e-05	-7.315e-05	-4.792e-05	-1.69e-05	-9.541e-09
-1.89e-05	-1.22e-05	8.87e-06	7.101e-06	-7.162e-05	-3.407e-05	-7.393e-05	-4.675e-05	-1.625e-05	9.67e-07
-1.822e-05	-1.181e-05	6.591e-06	7.752e-06	-7.26e-05	-3.348e-05	-7.51e-05	-4.577e-05	-1.755e-05	-9.861e-07
-1.773e-05	-1.074e-05	5.289e-06	8.728e-06	-7.162e-05	-3.055e-05	-7.491e-05	-4.538e-05	-1.788e-05	-2.939e-06
-1.763e-05	-9.761e-06	4.313e-06	1.036e-05	-6.888e-05	-2.762e-05	-7.51e-05	-4.675e-05	-1.82e-05	-5.869e-06
-1.773e-05	-8.004e-06	5.289e-06	1.068e-05	-6.83e-05	-2.41e-05	-7.627e-05	-4.948e-05	-1.918e-05	-7.497e-06
-1.666e-05	-6.246e-06	7.242e-06	1.036e-05	-6.576e-05	-2.02e-05	-7.725e-05	-5.163e-05	-1.82e-05	-7.171e-06
-1.636e-05	-5.953e-06	7.568e-06	9.705e-06	-6.342e-05	-1.668e-05	-7.94e-05	-5.261e-05	-1.853e-05	-6.52e-06
-1.636e-05	-5.758e-06	6.917e-06	9.705e-06	-6.166e-05	-1.551e-05	-8.116e-05	-5.261e-05	-1.788e-05	-6.194e-06
-1.519e-05	-5.367e-06	6.591e-06	1.101e-05	-5.853e-05	-1.375e-05	-8.252e-05	-5.163e-05	-1.82e-05	-3.916e-06
-1.519e-05	-6.636e-06	6.917e-06	1.101e-05	-5.521e-05	-1.18e-05	-8.233e-05	-5.027e-05	-1.983e-05	-1.963e-06
-1.519e-05	-7.32e-06	5.615e-06	9.705e-06	-5.092e-05	-9.065e-06	-8.33e-05	-4.89e-05	-2.276e-05	-1.963e-06
-1.656e-05	-6.734e-06	3.01e-06	8.728e-06	-4.603e-05	-5.354e-06	-8.37e-05	-4.675e-05	-2.504e-05	-3.265e-06
-1.871e-05	-6.148e-06	-2.448e-07	6.124e-06	-4.115e-05	-1.253e-06	-8.37e-05	-4.558e-05	-2.797e-05	-3.916e-06
-2.037e-05	-7.027e-06	-4.477e-06	2.869e-06	-3.724e-05	3.435e-06	-8.428e-05	-4.577e-05	-2.927e-05	-5.543e-06
-2.125e-05	-8.394e-06	-8.383e-06	-1.037e-06	-3.236e-05	7.537e-06	-8.467e-05	-4.46e-05	-2.992e-05	-6.52e-06
-2.193e-05	-9.566e-06	-1.359e-05	-3.641e-06	-2.845e-05	1.242e-05	-8.428e-05	-4.206e-05	-3.22e-05	-7.822e-06
-2.174e-05	-9.761e-06	-1.815e-05	-3.641e-06	-2.494e-05	1.789e-05	-8.448e-05	-4.011e-05	-3.318e-05	-8.473e-06
-2.232e-05	-9.273e-06	-2.336e-05	-3.316e-06	-2.181e-05	2.199e-05	-8.311e-05	-3.855e-05	-3.415e-05	-9.124e-06
-2.379e-05	-9.175e-06	-2.726e-05	-3.967e-06	-2.006e-05	2.57e-05	-7.979e-05	-3.659e-05	-3.578e-05	-9.775e-06
-2.437e-05	-1.005e-05	-3.019e-05	-5.269e-06	-1.928e-05	2.863e-05	-7.803e-05	-3.542e-05	-3.741e-05	-1.043e-05
-2.574e-05	-1.064e-05	-3.312e-05	-6.897e-06	-1.869e-05	3.019e-05	-7.627e-05	-3.425e-05	-3.806e-05	-1.075e-05
-2.711e-05	-1.211e-05	-3.28e-05	-7.873e-06	-1.771e-05	3.117e-05	-7.53e-05	-3.23e-05	-3.741e-05	-1.01e-05
-2.818e-05	-1.328e-05	-3.117e-05	-9.501e-06	-1.713e-05	3.234e-05	-7.491e-05	-3.015e-05	-3.578e-05	-9.45e-06
-2.945e-05	-1.425e-05	-3.084e-05	-1.08e-05	-1.556e-05	3.293e-05	-7.276e-05	-2.702e-05	-3.643e-05	-9.45e-06
-3.14e-05	-1.455e-05	-3.182e-05	-1.113e-05	-1.478e-05	3.449e-05	-7.198e-05	-2.37e-05	-3.871e-05	-9.775e-06
-3.238e-05	-1.523e-05	-3.28e-05	-1.08e-05	-1.42e-05	3.664e-05	-7.041e-05	-2.077e-05	-4.034e-05	-1.108e-05
-3.404e-05	-1.67e-05	-3.345e-05	-1.113e-05	-1.322e-05	3.898e-05	-6.748e-05	-1.843e-05	-4.229e-05	-1.303e-05
-3.541e-05	-1.894e-05	-3.149e-05	-1.048e-05	-1.146e-05	4.074e-05	-6.592e-05	-1.804e-05	-4.587e-05	-1.563e-05
-3.58e-05	-1.962e-05	-2.889e-05	-9.826e-06	-1.088e-05	4.172e-05	-6.475e-05	-1.882e-05	-4.62e-05	-1.563e-05
-3.629e-05	-2.05e-05	-2.759e-05	-8.524e-06	-1.049e-05	4.328e-05	-6.299e-05	-1.882e-05	-4.685e-05	-1.531e-05
-3.736e-05	-2.109e-05	-2.596e-05	-7.222e-06	-1.088e-05	4.426e-05	-6.358e-05	-1.98e-05	-4.945e-05	-1.368e-05
-3.756e-05	-2.07e-05	-2.596e-05	-8.524e-06	-1.049e-05	4.406e-05	-6.397e-05	-2.058e-05	-5.303e-05	-1.14e-05
-3.765e-05	-2.08e-05	-2.564e-05	-9.501e-06	-1.068e-05	4.308e-05	-6.338e-05	-2.058e-05	-5.466e-05	-1.043e-05
-3.892e-05	-2.07e-05	-2.596e-05	-9.175e-06	-1.127e-05	4.269e-05	-6.358e-05	-2.155e-05	-5.629e-05	-1.108e-05
-3.873e-05	-2.207e-05	-2.759e-05	-8.85e-06	-1.146e-05	4.25e-05	-6.436e-05	-2.136e-05	-5.727e-05	-1.205e-05
-3.804e-05	-2.441e-05	-2.857e-05	-8.524e-06	-1.205e-05	4.211e-05	-6.514e-05	-1.999e-05	-5.727e-05	-1.205e-05
-3.736e-05	-2.578e-05	-2.824e-05	-8.199e-06	-1.42e-05	4.054e-05	-6.612e-05	-1.804e-05	-5.792e-05	-1.205e-05
-3.57e-05	-2.636e-05	-2.857e-05	-8.199e-06	-1.693e-05	3.879e-05	-6.67e-05	-1.589e-05	-5.727e-05	-1.14e-05
-3.492e-05	-2.675e-05	-2.791e-05	-8.524e-06	-1.947e-05	3.722e-05	-6.592e-05	-1.374e-05	-5.727e-05	-1.108e-05
-3.375e-05	-2.705e-05	-2.791e-05	-7.873e-06	-2.299e-05	3.527e-05	-6.573e-05	-1.355e-05	-5.824e-05	-1.14e-05
-3.267e-05	-2.734e-05	-2.987e-05	-6.571e-06	-2.572e-05	3.41e-05	-6.534e-05	-1.569e-05	-6.052e-05	-1.173e-05
-3.287e-05	-2.89e-05	-2.987e-05	-3.641e-06	-2.904e-05	3.273e-05	-6.299e-05	-1.53e-05	-6.182e-05	-1.205e-05
-3.287e-05	-3.046e-05	-2.791e-05	-1.037e-06	-3.334e-05	3.039e-05	-6.338e-05	-1.452e-05	-6.345e-05	-1.238e-05
-3.287e-05	-3.095e-05	-2.433e-05	5.903e-07	-3.627e-05	2.707e-05	-6.358e-05	-1.394e-05	-6.313e-05	-1.368e-05
-3.326e-05	-3.056e-05	-2.043e-05	3.194e-06	-3.939e-05	2.551e-05	-6.338e-05	-1.472e-05	-6.313e-05	-1.661e-05
-3.365e-05	-2.988e-05	-1.75e-05	4.171e-06	-4.193e-05	2.414e-05	-6.553e-05	-1.491e-05	-6.345e-05	-1.824e-05
-3.267e-05	-2.822e-05	-1.587e-05	3.846e-06	-4.486e-05	2.062e-05	-6.651e-05	-1.628e-05	-6.28e-05	-1.889e-05
-3.17e-05	-2.695e-05	-1.782e-05	2.543e-06	-4.779e-05	1.769e-05	-6.748e-05	-1.804e-05	-6.508e-05	-1.954e-05
-3.121e-05	-2.48e-05	-2.01e-05	2.218e-06	-5.092e-05	1.535e-05	-6.807e-05	-1.921e-05	-6.606e-05	-1.856e-05
-3.15e-05	-2.295e-05	-2.205e-05	2.218e-06	-5.306e-05	1.261e-05	-6.69e-05	-1.921e-05	-6.736e-05	-1.759e-05
-3.238e-05	-2.216e-05	-2.303e-05	1.892e-06	-5.502e-05	1.066e-05	-6.573e-05	-1.882e-05	-6.801e-05	-1.694e-05
-3.267e-05	-2.187e-05	-2.271e-05	4.497e-06	-5.678e-05	9.294e-06	-6.651e-05	-1.862e-05	-6.964e-05	-1.661e-05
-3.189e-05	-2.168e-05	-2.14e-05	6.775e-06	-5.795e-05	7.341e-06	-6.631e-05	-1.804e-05	-6.964e-05	-1.726e-05
-3.14e-05	-2.08e-05	-2.043e-05	7.101e-06	-6.01e-05	4.216e-06	-6.67e-05	-1.765e-05	-7.126e-05	-1.791e-05
-3.033e-05	-2.002e-05	-2.075e-05	6.775e-06	-6.361e-05	1.872e-06	-6.768e-05	-1.823e-05	-7.289e-05	-1.824e-05
-2.965e-05	-2.002e-05	-2.271e-05	5.148e-06	-6.654e-05	1.146e-07	-6.768e-05	-1.882e-05	-7.387e-05	-1.759e-05
-3.004e-05	-1.982e-05	-2.466e-05	4.171e-06	-7.064e-05	-1.448e-06	-6.788e-05	-1.96e-05	-7.517e-05	-1.759e-05
-2.955e-05	-1.855e-05	-2.726e-05	4.171e-06	-7.435e-05	-1.448e-06	-6.846e-05	-2.116e-05	-7.387e-05	-1.596e-05
-2.886e-05	-1.709e-05	-2.922e-05	5.148e-06	-7.611e-05	-1.643e-06	-6.846e-05	-2.234e-05	-7.289e-05	-1.27e-05
-2.789e-05	-1.621e-05	-3.117e-05	4.171e-06	-7.631e-05	-1.643e-06	-7.041e-05	-2.331e-05	-7.094e-05	-1.108e-05
-2.545e-05	-1.474e-05	-3.247e-05	3.194e-06	-7.572e-05	-2.424e-06	-7.334e-05	-2.331e-05	-6.931e-05	-9.124e-06
-2.418e-05	-1.416e-05	-3.41e-05	1.567e-06	-7.474e-05	-3.01e-06	-7.53e-05	-2.292e-05	-6.638e-05	-6.845e-06
-2.32e-05	-1.347e-05	-3.442e-05	5.903e-07	-7.396e-05	-3.01e-06	-7.549e-05	-2.214e-05	-6.41e-05	-5.869e-06
-2.252e-05	-1.24e-05	-3.247e-05	-1.363e-06	-7.435e-05	-3.596e-06	-7.647e-05	-2.175e-05	-6.247e-05	-3.916e-06
-2.222e-05	-1.123e-05	-3.019e-05	-2.014e-06	-7.455e-05	-4.963e-06	-7.549e-05	-2.097e-05	-6.117e-05	-2.614e-06
-2.261e-05	-1.054e-05	-2.824e-05	-7.118e-07	-7.533e-05	-6.917e-06	-7.471e-05	-2.116e-05	-6.085e-05	-9.861e-07
-2.261e-05	-1.054e-05	-2.694e-05	1.892e-06	-7.572e-05	-8.088e-06	-7.354e-05	-2.155e-05	-5.922e-05	1.618e-06
-2.183e-05	-1.005e-05	-2.726e-05	4.822e-06	-7.494e-05	-9.065e-06	-7.178e-05	-2.234e-05	-5.792e-05	2.92e-06
-2.105e-05	-8.98e-06	-2.629e-05	6.124e-06	-7.357e-05	-7.503e-06	-7.159e-05	-2.351e-05	-5.824e-05	2.269e-06
-1.91e-05	-7.125e-06	-2.726e-05	7.101e-06	-7.24e-05	-6.721e-06	-7.217e-05	-2.507e-05	-5.824e-05	1.944e-06
-1.763e-05	-6.636e-06	-2.791e-05	7.101e-06	-7.084e-05	-5.354e-06	-7.1e-05	-2.585e-05	-5.759e-05	2.269e-06
-1.715e-05	-7.515e-06	-2.889e-05	6.124e-06	-7.064e-05	-4.768e-06	-7.198e-05	-2.644e-05	-5.792e-05	2.595e-06
-1.705e-05	-7.32e-06	-2.922e-05	4.822e-06	-6.849e-05	-3.596e-06	-7.295e-05	-2.702e-05	-5.759e-05	2.92e-06
-1.754e-05	-7.125e-06	-2.922e-05	2.869e-06	-6.595e-05	-2.229e-06	-7.139e-05	-2.527e-05	-5.662e-05	3.897e-06
-1.783e-05	-7.613e-06	-2.954e-05	-6.071e-08	-6.517e-05	-6.666e-07	-7.061e-05	-2.429e-05	-5.694e-05	4.548e-06
-1.744e-05	-8.297e-06	-3.019e-05	-7.118e-07	-6.342e-05	1.146e-07	-7.022e-05	-2.312e-05	-5.727e-05	5.85e-06
-1.763e-05	-8.59e-06	-3.149e-05	-2.014e-06	-6.244e-05	8.959e-07	-6.944e-05	-2.194e-05	-5.792e-05	6.501e-06
-1.783e-05	-8.297e-06	-3.41e-05	-2.665e-06	-6.146e-05	-8.068e-08	-7.061e-05	-2.253e-05	-5.727e-05	6.501e-06
-1.754e-05	-8.199e-06	-3.605e-05	-2.665e-06	-6.166e-05	-4.713e-07	-7.12e-05	-2.351e-05	-5.531e-05	5.524e-06
-1.871e-05	-8.394e-06	-3.54e-05	-3.641e-06	-6.166e-05	-6.666e-07	-7.276e-05	-2.39e-05	-5.303e-05	4.548e-06
-1.871e-05	-8.199e-06	-3.605e-05	-5.92e-06	-6.303e-05	-6.666e-07	-7.686e-05	-2.429e-05	-5.141e-05	3.571e-06
-1.871e-05	-7.32e-06	-3.573e-05	-8.199e-06	-6.224e-05	-8.619e-07	-7.92e-05	-2.409e-05	-5.076e-05	3.897e-06
-1.851e-05	-7.027e-06	-3.54e-05	-8.85e-06	-6.263e-05	-4.713e-07	-8.096e-05	-2.312e-05	-4.88e-05	5.199e-06
-1.754e-05	-7.222e-06	-3.67e-05	-7.548e-06	-6.244e-05	-4.713e-07	-8.174e-05	-2.331e-05	-4.848e-05	7.477e-06
-1.509e-05	-7.418e-06	-3.866e-05	-4.944e-06	-5.97e-05	-2.76e-07	-8.135e-05	-2.468e-05	-4.718e-05	9.105e-06
-1.343e-05	-6.929e-06	-3.898e-05	-2.014e-06	-5.638e-05	7.006e-07	-7.881e-05	-2.605e-05	-4.685e-05	9.756e-06
-1.314e-05	-6.734e-06	-3.801e-05	-7.118e-07	-5.443e-05	1.872e-06	-7.842e-05	-2.741e-05	-4.587e-05	9.756e-06
-1.373e-05	-6.734e-06	-3.638e-05	-1.037e-06	-5.15e-05	4.412e-06	-7.666e-05	-2.8e-05	-4.457e-05	7.803e-06
-1.597e-05	-6.832e-06	-3.573e-05	-2.99e-06	-4.955e-05	6.365e-06	-7.686e-05	-2.8e-05	-4.62e-05	7.803e-06
-1.783e-05	-7.027e-06	-3.54e-05	-6.246e-06	-4.857e-05	7.927e-06	-7.842e-05	-2.761e-05	-4.587e-05	8.128e-06
-1.92e-05	-7.906e-06	-3.67e-05	-9.501e-06	-4.76e-05	1.008e-05	-7.862e-05	-2.722e-05	-4.652e-05	9.756e-06
-1.929e-05	-8.883e-06	-4.093e-05	-1.243e-05	-4.76e-05	1.183e-05	-7.745e-05	-2.761e-05	-4.718e-05	9.756e-06
-1.812e-05	-8.492e-06	-4.614e-05	-1.373e-05	-4.662e-05	1.34e-05	-7.784e-05	-2.819e-05	-4.945e-05	1.008e-05
-1.646e-05	-7.222e-06	-5.07e-05	-1.536e-05	-4.584e-05	1.476e-05	-7.608e-05	-2.819e-05	-4.978e-05	1.008e-05
-1.549e-05	-6.539e-06	-5.298e-05	-1.634e-05	-4.506e-05	1.574e-05	-7.588e-05	-2.819e-05	-5.173e-05	8.454e-06
-1.422e-05	-5.172e-06	-5.396e-05	-1.731e-05	-4.428e-05	1.593e-05	-7.725e-05	-2.761e-05	-5.336e-05	6.501e-06
-1.353e-05	-4.586e-06	-5.461e-05	-1.862e-05	-4.388e-05	1.672e-05	-7.823e-05	-2.683e-05	-5.466e-05	5.199e-06
-1.461e-05	-4.488e-06	-5.461e-05	-1.992e-05	-4.408e-05	1.75e-05	-8.213e-05	-2.741e-05	-5.596e-05	6.175e-06
-1.47e-05	-4.097e-06	-5.558e-05	-2.089e-05	-4.467e-05	1.867e-05	-8.487e-05	-2.976e-05	-5.596e-05	8.454e-06
-1.461e-05	-4e-06	-5.689e-05	-2.024e-05	-4.388e-05	1.965e-05	-8.526e-05	-3.269e-05	-5.596e-05	1.008e-05
-1.353e-05	-4.39e-06	-5.689e-05	-1.959e-05	-4.31e-05	1.867e-05	-8.487e-05	-3.484e-05	-5.596e-05	9.431e-06
-1.148e-05	-4.39e-06	-5.591e-05	-1.699e-05	-4.154e-05	1.828e-05	-8.37e-05	-3.484e-05	-5.466e-05	9.431e-06
-1.07e-05	-2.925e-06	-5.461e-05	-1.536e-05	-4.115e-05	1.886e-05	-8.252e-05	-3.425e-05	-5.369e-05	8.454e-06
-1.07e-05	-1.363e-06	-5.233e-05	-1.471e-05	-4.193e-05	1.789e-05	-8.291e-05	-3.249e-05	-5.271e-05	8.454e-06
-1.08e-05	-2.888e-07	-5.135e-05	-1.503e-05	-4.193e-05	1.711e-05	-8.448e-05	-3.054e-05	-5.043e-05	7.477e-06
-1.041e-05	4.925e-07	-5.103e-05	-1.536e-05	-4.291e-05	1.633e-05	-8.409e-05	-2.819e-05	-4.978e-05	6.175e-06
-9.821e-06	1.664e-06	-4.907e-05	-1.341e-05	-4.486e-05	1.574e-05	-8.233e-05	-2.722e-05	-5.238e-05	2.92e-06
-7.673e-06	4.008e-06	-4.745e-05	-1.048e-05	-4.486e-05	1.34e-05	-7.842e-05	-2.624e-05	-5.303e-05	1.618e-06
-5.524e-06	5.668e-06	-4.582e-05	-9.175e-06	-4.486e-05	1.261e-05	-7.334e-05	-2.468e-05	-5.531e-05	3.16e-07
-3.083e-06	5.864e-06	-4.321e-05	-9.501e-06	-4.545e-05	1.203e-05	-7.022e-05	-2.273e-05	-5.694e-05	-9.861e-07
3.353e-07	7.133e-06	-4.159e-05	-1.015e-05	-4.564e-05	1.086e-05	-6.729e-05	-2.077e-05	-5.792e-05	-2.614e-06
2.093e-06	8.891e-06	-4.093e-05	-1.08e-05	-4.642e-05	1.027e-05	-6.573e-05	-1.921e-05	-5.727e-05	-4.892e-06
3.265e-06	1.026e-05	-3.735e-05	-1.113e-05	-4.74e-05	1.047e-05	-6.573e-05	-1.823e-05	-5.792e-05	-5.869e-06
3.753e-06	1.309e-05	-3.54e-05	-1.015e-05	-4.818e-05	1.105e-05	-6.514e-05	-1.784e-05	-5.824e-05	-5.869e-06
3.851e-06	1.592e-05	-3.508e-05	-7.873e-06	-4.857e-05	1.105e-05	-6.338e-05	-1.745e-05	-5.824e-05	-6.52e-06
4.437e-06	1.729e-05	-3.67e-05	-6.571e-06	-5.111e-05	9.88e-06	-6.163e-05	-1.921e-05	-5.889e-05	-6.845e-06
5.902e-06	1.846e-05	-3.833e-05	-3.967e-06	-5.209e-05	9.49e-06	-5.967e-05	-1.941e-05	-5.889e-05	-6.52e-06
7.074e-06	2.041e-05	-3.833e-05	-4.292e-06	-5.345e-05	8.122e-06	-5.928e-05	-1.902e-05	-5.857e-05	-7.171e-06
9.222e-06	2.256e-05	-3.573e-05	-3.316e-06	-5.521e-05	6.951e-06	-6.026e-05	-1.823e-05	-5.857e-05	-6.845e-06
1.059e-05	2.295e-05	-3.508e-05	-4.292e-06	-5.599e-05	5.388e-06	-6.163e-05	-1.628e-05	-5.792e-05	-6.52e-06
1.088e-05	2.178e-05	-3.54e-05	-5.92e-06	-5.814e-05	3.826e-06	-6.26e-05	-1.394e-05	-5.792e-05	-6.194e-06
1.176e-05	2.1e-05	-3.508e-05	-6.897e-06	-6.068e-05	1.287e-06	-6.475e-05	-1.296e-05	-5.857e-05	-7.171e-06
1.215e-05	2.002e-05	-3.573e-05	-7.873e-06	-6.127e-05	-8.619e-07	-6.436e-05	-1.277e-05	-5.987e-05	-9.775e-06
1.244e-05	1.993e-05	-3.508e-05	-6.246e-06	-6.381e-05	-3.01e-06	-6.299e-05	-1.316e-05	-6.15e-05	-1.173e-05
1.303e-05	2.022e-05	-3.182e-05	-3.641e-06	-6.556e-05	-4.963e-06	-6.241e-05	-1.355e-05	-6.345e-05	-1.498e-05
1.313e-05	1.993e-05	-2.759e-05	-2.665e-06	-6.732e-05	-5.745e-06	-6.182e-05	-1.374e-05	-6.443e-05	-1.661e-05
1.244e-05	1.924e-05	-2.433e-05	-1.688e-06	-6.81e-05	-6.331e-06	-6.182e-05	-1.394e-05	-6.573e-05	-1.661e-05
1.225e-05	1.973e-05	-2.075e-05	-7.118e-07	-6.888e-05	-6.721e-06	-6.28e-05	-1.452e-05	-6.703e-05	-1.563e-05
1.176e-05	2.032e-05	-1.88e-05	-1.363e-06	-6.81e-05	-5.354e-06	-6.202e-05	-1.394e-05	-6.638e-05	-1.466e-05
1.02e-05	1.973e-05	-1.847e-05	-1.363e-06	-6.713e-05	-4.378e-06	-6.143e-05	-1.355e-05	-6.833e-05	-1.433e-05
9.417e-06	1.827e-05	-1.847e-05	-3.862e-07	-6.595e-05	-4.182e-06	-6.143e-05	-1.394e-05	-6.996e-05	-1.368e-05
7.464e-06	1.543e-05	-1.88e-05	2.218e-06	-6.303e-05	-4.182e-06	-5.987e-05	-1.296e-05	-7.094e-05	-1.173e-05
6.097e-06	1.289e-05	-1.847e-05	4.497e-06	-6.166e-05	-4.573e-06	-5.909e-05	-1.218e-05	-7.061e-05	-8.799e-06
6.195e-06	1.221e-05	-1.978e-05	7.101e-06	-6.068e-05	-5.549e-06	-5.948e-05	-1.179e-05	-6.964e-05	-7.171e-06
6.195e-06	1.202e-05	-2.303e-05	7.101e-06	-6.068e-05	-5.94e-06	-5.928e-05	-1.12e-05	-6.671e-05	-4.567e-06
5.902e-06	1.182e-05	-2.466e-05	6.124e-06	-6.146e-05	-6.526e-06	-5.967e-05	-1.101e-05	-6.475e-05	-3.59e-06
6.195e-06	1.221e-05	-2.564e-05	4.497e-06	-6.166e-05	-7.112e-06	-6.065e-05	-1.081e-05	-6.215e-05	-2.614e-06
6.39e-06	1.26e-05	-2.694e-05	2.543e-06	-6.049e-05	-6.721e-06	-5.948e-05	-1.062e-05	-5.857e-05	-2.614e-06
7.074e-06	1.221e-05	-2.759e-05	2.869e-06	-6.029e-05	-7.112e-06	-5.889e-05	-1.081e-05	-5.792e-05	-3.265e-06
8.831e-06	1.319e-05	-2.954e-05	4.171e-06	-6.146e-05	-7.698e-06	-5.967e-05	-1.237e-05	-5.596e-05	-3.265e-06
9.808e-06	1.329e-05	-2.954e-05	5.148e-06	-6.263e-05	-8.284e-06	-6.065e-05	-1.472e-05	-5.499e-05	-2.614e-06
1.078e-05	1.397e-05	-2.857e-05	4.822e-06	-6.478e-05	-8.479e-06	-6.241e-05	-1.648e-05	-5.531e-05	-1.312e-06
1.118e-05	1.475e-05	-2.694e-05	1.892e-06	-6.595e-05	-8.674e-06	-6.436e-05	-1.784e-05	-5.564e-05	-1.312e-06
1.078e-05	1.563e-05	-2.498e-05	1.241e-06	-6.791e-05	-8.284e-06	-6.416e-05	-1.882e-05	-5.564e-05	-1.963e-06
1.049e-05	1.631e-05	-2.336e-05	1.567e-06	-6.869e-05	-9.065e-06	-6.475e-05	-2.019e-05	-5.727e-05	-1.963e-06
9.906e-06	1.69e-05	-2.336e-05	4.171e-06	-6.869e-05	-8.674e-06	-6.514e-05	-2.038e-05	-5.857e-05	-4.241e-06
9.124e-06	1.651e-05	-2.433e-05	6.124e-06	-6.908e-05	-9.26e-06	-6.455e-05	-2.019e-05	-6.085e-05	-6.52e-06
8.734e-06	1.612e-05	-2.564e-05	7.426e-06	-7.123e-05	-9.651e-06	-6.495e-05	-2.038e-05	-6.313e-05	-8.799e-06
8.538e-06	1.543e-05	-2.629e-05	7.101e-06	-7.318e-05	-9.846e-06	-6.495e-05	-2.097e-05	-6.378e-05	-1.075e-05
7.855e-06	1.329e-05	-2.726e-05	4.497e-06	-7.435e-05	-1.121e-05	-6.436e-05	-2.116e-05	-6.573e-05	-1.303e-05
7.464e-06	1.163e-05	-2.726e-05	-6.072e-08	-7.513e-05	-1.199e-05	-6.592e-05	-2.234e-05	-6.801e-05	-1.531e-05
7.562e-06	1.143e-05	-2.629e-05	-3.967e-06	-7.513e-05	-1.16e-05	-6.651e-05	-2.312e-05	-6.899e-05	-1.726e-05
6.683e-06	1.202e-05	-2.694e-05	-7.222e-06	-7.494e-05	-1.16e-05	-6.651e-05	-2.37e-05	-6.899e-05	-1.856e-05
5.999e-06	1.309e-05	-2.987e-05	-9.175e-06	-7.513e-05	-1.258e-05	-6.768e-05	-2.448e-05	-7.126e-05	-1.889e-05
6.097e-06	1.475e-05	-3.345e-05	-9.175e-06	-7.474e-05	-1.336e-05	-6.709e-05	-2.468e-05	-7.126e-05	-1.759e-05
6.097e-06	1.563e-05	-3.703e-05	-6.571e-06	-7.572e-05	-1.492e-05	-6.553e-05	-2.527e-05	-7.094e-05	-1.791e-05
5.902e-06	1.573e-05	-3.801e-05	-5.269e-06	-7.787e-05	-1.668e-05	-6.612e-05	-2.663e-05	-6.931e-05	-1.824e-05
5.999e-06	1.563e-05	-3.866e-05	-6.571e-06	-7.787e-05	-1.785e-05	-6.592e-05	-2.761e-05	-6.801e-05	-1.922e-05
6.39e-06	1.563e-05	-3.833e-05	-8.524e-06	-7.787e-05	-1.864e-05	-6.631e-05	-2.761e-05	-6.801e-05	-1.954e-05
7.855e-06	1.553e-05	-3.735e-05	-1.048e-05	-7.631e-05	-1.864e-05	-6.748e-05	-2.722e-05	-6.638e-05	-1.954e-05
9.222e-06	1.602e-05	-3.703e-05	-1.21e-05	-7.396e-05	-1.942e-05	-6.748e-05	-2.624e-05	-6.443e-05	-1.922e-05
9.613e-06	1.641e-05	-3.703e-05	-1.145e-05	-7.279e-05	-1.961e-05	-6.592e-05	-2.546e-05	-6.247e-05	-1.856e-05
9.906e-06	1.719e-05	-3.735e-05	-8.85e-06	-7.357e-05	-2.078e-05	-6.612e-05	-2.624e-05	-6.215e-05	-1.791e-05
1.039e-05	1.768e-05	-3.898e-05	-5.595e-06	-7.338e-05	-2.059e-05	-6.377e-05	-2.78e-05	-5.987e-05	-1.791e-05
9.906e-06	1.67e-05	-3.768e-05	-1.688e-06	-7.435e-05	-2.098e-05	-6.241e-05	-2.78e-05	-5.792e-05	-1.759e-05
9.222e-06	1.622e-05	-3.442e-05	1.567e-06	-7.455e-05	-2.176e-05	-6.221e-05	-2.722e-05	-5.629e-05	-1.661e-05
9.027e-06	1.573e-05	-3.019e-05	2.543e-06	-7.416e-05	-2.137e-05	-6.182e-05	-2.683e-05	-5.499e-05	-1.596e-05
7.757e-06	1.446e-05	-2.629e-05	1.567e-06	-7.318e-05	-2.117e-05	-6.241e-05	-2.605e-05	-5.662e-05	-1.629e-05
6.781e-06	1.329e-05	-2.238e-05	5.903e-07	-7.142e-05	-2.02e-05	-6.26e-05	-2.527e-05	-5.792e-05	-1.563e-05
5.316e-06	1.25e-05	-1.88e-05	9.158e-07	-6.947e-05	-1.785e-05	-6.202e-05	-2.527e-05	-5.857e-05	-1.498e-05
3.753e-06	1.299e-05	-1.554e-05	1.567e-06	-6.869e-05	-1.571e-05	-6.202e-05	-2.644e-05	-6.02e-05	-1.596e-05
3.558e-06	1.387e-05	-1.261e-05	4.497e-06	-6.771e-05	-1.375e-05	-6.182e-05	-2.741e-05	-6.15e-05	-1.791e-05
2.581e-06	1.446e-05	-1.066e-05	8.077e-06	-6.595e-05	-1.356e-05	-5.85e-05	-2.663e-05	-6.28e-05	-1.954e-05
1.8e-06	1.514e-05	-7.081e-06	1.166e-05	-6.537e-05	-1.356e-05	-5.577e-05	-2.585e-05	-6.443e-05	-2.117e-05
1.702e-06	1.407e-05	-4.477e-06	1.394e-05	-6.342e-05	-1.258e-05	-5.44e-05	-2.605e-05	-6.703e-05	-2.182e-05
2.191e-06	1.172e-05	-2.523e-06	1.524e-05	-6.127e-05	-1.004e-05	-5.44e-05	-2.507e-05	-6.931e-05	-2.247e-05
2.972e-06	1.006e-05	-1.221e-06	1.426e-05	-5.99e-05	-7.698e-06	-5.635e-05	-2.468e-05	-7.159e-05	-2.475e-05
4.242e-06	1.036e-05	-5.703e-07	1.296e-05	-5.873e-05	-6.331e-06	-5.85e-05	-2.605e-05	-7.322e-05	-2.735e-05
5.999e-06	1.153e-05	-5.703e-07	1.426e-05	-5.658e-05	-5.94e-06	-5.909e-05	-2.605e-05	-7.257e-05	-2.931e-05
7.171e-06	1.28e-05	-1.547e-06	1.817e-05	-5.599e-05	-5.94e-06	-6.045e-05	-2.78e-05	-7.257e-05	-3.093e-05
7.855e-06	1.485e-05	7.318e-07	2.273e-05	-5.443e-05	-6.526e-06	-6.006e-05	-2.917e-05	-7.126e-05	-3.159e-05
8.441e-06	1.622e-05	3.01e-06	2.598e-05	-5.306e-05	-6.135e-06	-5.772e-05	-2.976e-05	-7.061e-05	-3.061e-05
9.222e-06	1.661e-05	5.615e-06	2.761e-05	-5.209e-05	-4.573e-06	-5.694e-05	-3.015e-05	-6.996e-05	-2.931e-05
1.059e-05	1.592e-05	8.544e-06	2.761e-05	-4.994e-05	-6.666e-07	-5.674e-05	-2.956e-05	-6.899e-05	-2.866e-05
1.108e-05	1.514e-05	1.017e-05	2.728e-05	-4.896e-05	1.872e-06	-5.616e-05	-2.839e-05	-6.931e-05	-2.8e-05
1.166e-05	1.514e-05	1.05e-05	2.826e-05	-4.76e-05	4.412e-06	-5.811e-05	-2.819e-05	-7.094e-05	-2.768e-05
1.176e-05	1.524e-05	1.082e-05	3.119e-05	-4.525e-05	5.779e-06	-5.909e-05	-2.78e-05	-7.159e-05	-2.8e-05
1.166e-05	1.446e-05	1.245e-05	3.542e-05	-4.232e-05	6.365e-06	-5.791e-05	-2.624e-05	-7.322e-05	-2.833e-05
1.118e-05	1.446e-05	1.505e-05	3.998e-05	-4.252e-05	5.583e-06	-5.83e-05	-2.644e-05	-7.452e-05	-2.963e-05
1.078e-05	1.485e-05	1.929e-05	4.291e-05	-4.115e-05	5.388e-06	-5.772e-05	-2.644e-05	-7.419e-05	-3.093e-05
1.01e-05	1.524e-05	2.384e-05	4.388e-05	-3.998e-05	5.583e-06	-5.733e-05	-2.624e-05	-7.452e-05	-3.159e-05
9.906e-06	1.592e-05	2.677e-05	4.421e-05	-4.017e-05	5.193e-06	-5.87e-05	-2.624e-05	-7.484e-05	-3.354e-05
1.049e-05	1.612e-05	2.97e-05	4.323e-05	-3.978e-05	4.412e-06	-6.104e-05	-2.663e-05	-7.615e-05	-3.484e-05
1.108e-05	1.68e-05	3.068e-05	4.356e-05	-4.017e-05	4.802e-06	-6.182e-05	-2.722e-05	-7.843e-05	-3.549e-05
1.244e-05	1.758e-05	3.198e-05	4.584e-05	-4.135e-05	3.826e-06	-6.377e-05	-2.956e-05	-8.103e-05	-3.582e-05
1.371e-05	1.797e-05	3.101e-05	4.812e-05	-4.115e-05	2.263e-06	-6.397e-05	-3.191e-05	-8.298e-05	-3.386e-05
1.381e-05	1.856e-05	2.905e-05	4.877e-05	-4.056e-05	5.053e-07	-6.299e-05	-3.366e-05	-8.591e-05	-3.289e-05
1.479e-05	1.856e-05	2.71e-05	4.714e-05	-3.998e-05	1.146e-07	-6.397e-05	-3.757e-05	-8.721e-05	-3.191e-05
1.518e-05	1.758e-05	2.515e-05	4.291e-05	-4.037e-05	8.959e-07	-6.358e-05	-3.972e-05	-8.754e-05	-3.191e-05
1.479e-05	1.661e-05	2.449e-05	3.998e-05	-4.174e-05	1.482e-06	-6.338e-05	-4.128e-05	-8.721e-05	-3.289e-05
1.547e-05	1.631e-05	2.482e-05	3.933e-05	-4.31e-05	1.677e-06	-6.455e-05	-4.362e-05	-8.396e-05	-3.354e-05
1.528e-05	1.563e-05	2.449e-05	4.063e-05	-4.291e-05	1.287e-06	-6.534e-05	-4.597e-05	-8.07e-05	-3.321e-05
1.42e-05	1.524e-05	2.352e-05	4.193e-05	-4.252e-05	1.146e-07	-6.553e-05	-4.851e-05	-7.94e-05	-3.354e-05
1.401e-05	1.524e-05	2.222e-05	4.323e-05	-4.271e-05	-1.057e-06	-6.709e-05	-5.007e-05	-7.777e-05	-3.386e-05
1.43e-05	1.504e-05	1.864e-05	4.454e-05	-4.271e-05	-1.643e-06	-6.651e-05	-4.987e-05	-7.55e-05	-3.484e-05
1.352e-05	1.387e-05	1.733e-05	4.323e-05	-4.291e-05	-2.62e-06	-6.592e-05	-4.831e-05	-7.452e-05	-3.517e-05
1.235e-05	1.299e-05	1.831e-05	4.193e-05	-4.388e-05	-3.206e-06	-6.553e-05	-4.46e-05	-7.484e-05	-3.354e-05
1.147e-05	1.26e-05	2.059e-05	4.063e-05	-4.486e-05	-3.401e-06	-6.495e-05	-4.03e-05	-7.452e-05	-3.159e-05
1.01e-05	1.27e-05	2.449e-05	3.998e-05	-4.642e-05	-3.987e-06	-6.573e-05	-3.64e-05	-7.484e-05	-2.996e-05
8.831e-06	1.192e-05	2.808e-05	4.128e-05	-4.838e-05	-5.549e-06	-6.534e-05	-3.405e-05	-7.452e-05	-2.931e-05
7.66e-06	1.153e-05	3.035e-05	4.356e-05	-4.994e-05	-7.698e-06	-6.123e-05	-3.366e-05	-7.55e-05	-3.028e-05
5.902e-06	1.123e-05	3.231e-05	4.551e-05	-5.111e-05	-1.043e-05	-5.655e-05	-3.444e-05	-7.647e-05	-3.191e-05
4.827e-06	1.036e-05	3.263e-05	4.812e-05	-5.326e-05	-1.336e-05	-5.245e-05	-3.269e-05	-7.712e-05	-3.191e-05
3.363e-06	9.184e-06	3.328e-05	4.844e-05	-5.482e-05	-1.492e-05	-4.873e-05	-2.898e-05	-7.745e-05	-3.224e-05
2.191e-06	8.403e-06	3.589e-05	4.551e-05	-5.912e-05	-1.746e-05	-4.834e-05	-2.605e-05	-7.908e-05	-3.224e-05
1.214e-06	8.793e-06	3.784e-05	4.356e-05	-6.185e-05	-1.942e-05	-4.873e-05	-2.527e-05	-7.973e-05	-3.289e-05
5.306e-07	8.403e-06	3.784e-05	4.258e-05	-6.498e-05	-2.196e-05	-4.991e-05	-2.507e-05	-7.973e-05	-3.354e-05
5.306e-07	7.231e-06	3.719e-05	4.388e-05	-6.674e-05	-2.547e-05	-5.205e-05	-2.546e-05	-8.136e-05	-3.549e-05
1.117e-06	6.645e-06	3.491e-05	4.584e-05	-6.732e-05	-2.977e-05	-5.303e-05	-2.585e-05	-8.168e-05	-3.679e-05
7.259e-07	5.961e-06	3.068e-05	4.714e-05	-6.654e-05	-3.289e-05	-5.205e-05	-2.585e-05	-8.233e-05	-3.777e-05
1.4e-07	5.375e-06	2.384e-05	4.844e-05	-6.752e-05	-3.426e-05	-5.225e-05	-2.566e-05	-8.201e-05	-3.712e-05
-5.436e-07	5.473e-06	1.929e-05	4.649e-05	-6.81e-05	-3.387e-05	-5.088e-05	-2.507e-05	-7.875e-05	-3.451e-05
-1.52e-06	6.059e-06	1.636e-05	4.128e-05	-6.869e-05	-3.25e-05	-4.952e-05	-2.312e-05	-7.582e-05	-3.354e-05
-1.325e-06	5.961e-06	1.701e-05	3.64e-05	-7.162e-05	-3.172e-05	-4.913e-05	-2.155e-05	-7.419e-05	-3.256e-05
-7.389e-07	6.059e-06	1.864e-05	3.314e-05	-7.318e-05	-3.074e-05	-4.952e-05	-2.136e-05	-7.354e-05	-3.256e-05
-6.413e-07	4.985e-06	1.896e-05	3.314e-05	-7.474e-05	-3.192e-05	-4.873e-05	-2.194e-05	-7.191e-05	-3.224e-05
4.234e-08	3.91e-06	1.766e-05	3.477e-05	-7.631e-05	-3.309e-05	-4.854e-05	-2.194e-05	-7.126e-05	-3.224e-05
1.41e-06	3.813e-06	1.603e-05	3.737e-05	-7.572e-05	-3.407e-05	-4.698e-05	-2.155e-05	-7.029e-05	-3.224e-05
1.507e-06	3.715e-06	1.473e-05	4.128e-05	-7.513e-05	-3.407e-05	-4.307e-05	-1.98e-05	-7.029e-05	-3.061e-05
1.214e-06	3.325e-06	1.538e-05	4.258e-05	-7.513e-05	-3.426e-05	-4.073e-05	-1.804e-05	-6.931e-05	-2.931e-05
5.306e-07	2.836e-06	1.864e-05	4.323e-05	-7.455e-05	-3.367e-05	-3.741e-05	-1.53e-05	-6.833e-05	-2.8e-05
-9.342e-07	2.153e-06	2.189e-05	4.258e-05	-7.553e-05	-3.407e-05	-3.487e-05	-1.277e-05	-6.736e-05	-2.735e-05
-1.325e-06	1.762e-06	2.677e-05	4.323e-05	-7.65e-05	-3.524e-05	-3.33e-05	-1.023e-05	-6.671e-05	-2.8e-05
-2.204e-06	1.664e-06	3.035e-05	4.388e-05	-7.689e-05	-3.68e-05	-3.096e-05	-8.468e-06	-6.671e-05	-2.833e-05
-3.376e-06	1.371e-06	3.198e-05	4.291e-05	-7.67e-05	-3.836e-05	-2.803e-05	-8.078e-06	-6.833e-05	-2.898e-05
-3.473e-06	8.831e-07	3.198e-05	4.258e-05	-7.494e-05	-3.817e-05	-2.705e-05	-7.492e-06	-7.224e-05	-3.028e-05
-2.985e-06	5.901e-07	3.003e-05	4.226e-05	-7.24e-05	-3.739e-05	-2.549e-05	-6.515e-06	-7.354e-05	-3.028e-05
-3.278e-06	4.925e-07	2.775e-05	4.291e-05	-7.123e-05	-3.602e-05	-2.354e-05	-4.562e-06	-7.582e-05	-2.996e-05
-3.376e-06	1.567e-06	2.515e-05	4.226e-05	-7.045e-05	-3.328e-05	-2.393e-05	-2.804e-06	-7.647e-05	-3.028e-05
-2.301e-06	2.153e-06	2.189e-05	3.965e-05	-6.967e-05	-3.035e-05	-2.334e-05	-4.604e-07	-7.647e-05	-3.061e-05
-2.399e-06	2.836e-06	1.929e-05	3.607e-05	-6.967e-05	-2.84e-05	-2.354e-05	1.493e-06	-7.81e-05	-3.093e-05
-1.423e-06	3.422e-06	1.701e-05	3.412e-05	-7.045e-05	-2.918e-05	-2.471e-05	2.469e-06	-7.712e-05	-3.093e-05
-1.13e-06	3.715e-06	1.44e-05	3.347e-05	-7.26e-05	-3.172e-05	-2.608e-05	2.079e-06	-7.484e-05	-2.996e-05
-2.204e-06	3.91e-06	1.278e-05	3.314e-05	-7.416e-05	-3.485e-05	-2.588e-05	1.297e-06	-7.289e-05	-2.931e-05
-3.278e-06	3.52e-06	1.31e-05	3.249e-05	-7.455e-05	-3.758e-05	-2.53e-05	1.255e-07	-7.191e-05	-2.866e-05
-4.352e-06	3.91e-06	1.473e-05	3.119e-05	-7.553e-05	-3.758e-05	-2.315e-05	9.068e-07	-6.996e-05	-2.833e-05
-5.133e-06	3.715e-06	1.733e-05	3.217e-05	-7.631e-05	-3.66e-05	-2.198e-05	9.068e-07	-6.768e-05	-2.898e-05
-5.329e-06	3.032e-06	1.831e-05	3.314e-05	-7.65e-05	-3.504e-05	-2.237e-05	2.469e-06	-6.443e-05	-2.996e-05
-4.84e-06	1.957e-06	1.864e-05	3.217e-05	-7.67e-05	-3.446e-05	-2.178e-05	5.79e-06	-6.085e-05	-3.126e-05
-5.231e-06	1.567e-06	1.798e-05	3.151e-05	-7.689e-05	-3.485e-05	-2.334e-05	8.133e-06	-5.955e-05	-3.191e-05
-4.548e-06	1.371e-06	1.831e-05	3.119e-05	-7.689e-05	-3.504e-05	-2.393e-05	9.696e-06	-5.824e-05	-3.061e-05
-4.938e-06	1.274e-06	1.831e-05	2.924e-05	-7.592e-05	-3.602e-05	-2.315e-05	9.501e-06	-5.889e-05	-2.833e-05
-5.817e-06	6.878e-07	1.798e-05	2.924e-05	-7.553e-05	-3.563e-05	-2.276e-05	7.157e-06	-6.085e-05	-2.54e-05
-6.501e-06	4.196e-09	1.733e-05	2.761e-05	-7.416e-05	-3.504e-05	-2.159e-05	5.008e-06	-6.378e-05	-2.084e-05
-7.087e-06	-9.346e-08	1.538e-05	2.566e-05	-7.181e-05	-3.348e-05	-1.866e-05	4.813e-06	-6.443e-05	-1.824e-05
-7.477e-06	1.995e-07	1.44e-05	2.24e-05	-7.025e-05	-3.289e-05	-1.866e-05	3.836e-06	-6.508e-05	-1.824e-05
-6.989e-06	4.197e-09	1.245e-05	2.077e-05	-6.869e-05	-3.211e-05	-1.885e-05	2.665e-06	-6.28e-05	-1.954e-05
-6.501e-06	-1.07e-06	1.18e-05	2.11e-05	-6.771e-05	-3.231e-05	-1.866e-05	2.079e-06	-6.02e-05	-1.954e-05
-6.208e-06	-1.265e-06	1.115e-05	2.077e-05	-6.791e-05	-3.387e-05	-2.061e-05	1.493e-06	-5.824e-05	-2.052e-05
-5.817e-06	-6.794e-07	8.87e-06	1.947e-05	-6.771e-05	-3.465e-05	-2.315e-05	1.883e-06	-5.564e-05	-2.117e-05
-5.231e-06	-8.747e-07	6.266e-06	1.719e-05	-6.674e-05	-3.387e-05	-2.569e-05	1.688e-06	-5.401e-05	-2.052e-05
-4.352e-06	-4.841e-07	2.685e-06	1.491e-05	-6.654e-05	-3.348e-05	-2.92e-05	1.297e-06	-5.303e-05	-1.954e-05
-3.278e-06	4.196e-09	1.057e-06	1.263e-05	-6.576e-05	-3.211e-05	-3.116e-05	1.255e-07	-5.173e-05	-1.791e-05
-2.399e-06	7.854e-07	-8.958e-07	1.166e-05	-6.459e-05	-3.094e-05	-3.116e-05	-4.604e-07	-5.043e-05	-1.726e-05
-8.366e-07	1.957e-06	-1.872e-06	1.231e-05	-6.459e-05	-2.996e-05	-3.33e-05	-1.046e-06	-4.978e-05	-1.726e-05
3.353e-07	2.348e-06	-2.849e-06	1.133e-05	-6.4e-05	-3.035e-05	-3.506e-05	-1.242e-06	-4.88e-05	-1.791e-05
7.259e-07	1.762e-06	-3.174e-06	8.403e-06	-6.498e-05	-3.074e-05	-3.526e-05	-1.437e-06	-4.652e-05	-1.759e-05
1.019e-06	1.567e-06	-3.826e-06	7.426e-06	-6.693e-05	-3.074e-05	-3.604e-05	-2.023e-06	-4.49e-05	-1.759e-05
1.898e-06	1.371e-06	-4.477e-06	6.124e-06	-6.693e-05	-3.094e-05	-3.565e-05	-2.414e-06	-4.262e-05	-1.629e-05
1.019e-06	8.831e-07	-4.802e-06	5.148e-06	-6.635e-05	-3.114e-05	-3.506e-05	-4.171e-06	-4.229e-05	-1.596e-05
4.33e-07	1.078e-06	-4.151e-06	5.799e-06	-6.498e-05	-3.27e-05	-3.409e-05	-6.71e-06	-4.164e-05	-1.596e-05
3.353e-07	1.078e-06	-3.826e-06	5.799e-06	-6.322e-05	-3.367e-05	-3.174e-05	-8.664e-06	-4.066e-05	-1.531e-05
1.4e-07	2.972e-07	-3.174e-06	5.799e-06	-6.244e-05	-3.465e-05	-2.979e-05	-9.054e-06	-4.132e-05	-1.661e-05
1.4e-07	-9.346e-08	-1.547e-06	4.497e-06	-6.303e-05	-3.66e-05	-2.92e-05	-8.664e-06	-4.164e-05	-1.824e-05
3.353e-07	4.195e-09	8.074e-08	3.52e-06	-6.361e-05	-3.758e-05	-2.842e-05	-7.101e-06	-4.294e-05	-1.954e-05
4.234e-08	4.196e-09	-8.958e-07	9.158e-07	-6.576e-05	-3.836e-05	-2.901e-05	-4.757e-06	-4.327e-05	-2.117e-05
6.283e-07	1.019e-07	-1.221e-06	-1.688e-06	-6.576e-05	-3.856e-05	-3.096e-05	-3.781e-06	-4.294e-05	-2.182e-05
1.214e-06	-9.346e-08	-3.826e-06	-2.99e-06	-6.517e-05	-3.875e-05	-3.174e-05	-3.39e-06	-4.197e-05	-2.052e-05
1.41e-06	1.995e-07	-6.43e-06	-2.99e-06	-6.556e-05	-3.856e-05	-3.33e-05	-4.367e-06	-4.229e-05	-1.922e-05
1.312e-06	9.808e-07	-8.383e-06	-2.665e-06	-6.537e-05	-3.758e-05	-3.448e-05	-6.515e-06	-4.066e-05	-1.824e-05
1.8e-06	1.176e-06	-1.034e-05	-2.99e-06	-6.361e-05	-3.778e-05	-3.487e-05	-8.078e-06	-4.001e-05	-1.759e-05
9.212e-07	1.176e-06	-1.261e-05	-4.292e-06	-6.42e-05	-3.797e-05	-3.506e-05	-9.835e-06	-3.936e-05	-1.791e-05
1.117e-06	2.055e-06	-1.457e-05	-5.92e-06	-6.537e-05	-3.836e-05	-3.565e-05	-1.023e-05	-3.871e-05	-1.759e-05
1.312e-06	2.934e-06	-1.554e-05	-7.222e-06	-6.615e-05	-3.817e-05	-3.584e-05	-8.664e-06	-3.806e-05	-1.661e-05
1.41e-06	2.836e-06	-1.685e-05	-8.199e-06	-6.615e-05	-3.817e-05	-3.663e-05	-7.296e-06	-3.839e-05	-1.629e-05
1.8e-06	3.227e-06	-1.717e-05	-7.873e-06	-6.615e-05	-3.699e-05	-3.741e-05	-5.148e-06	-3.774e-05	-1.596e-05
1.702e-06	3.129e-06	-1.88e-05	-8.199e-06	-6.537e-05	-3.621e-05	-3.604e-05	-3.781e-06	-3.481e-05	-1.661e-05
1.41e-06	2.739e-06	-1.978e-05	-9.175e-06	-6.42e-05	-3.68e-05	-3.526e-05	-2.999e-06	-3.318e-05	-1.726e-05
1.995e-06	3.032e-06	-1.978e-05	-9.501e-06	-6.244e-05	-3.817e-05	-3.448e-05	-3.195e-06	-3.188e-05	-1.759e-05
2.288e-06	2.836e-06	-2.043e-05	-1.015e-05	-6.146e-05	-3.934e-05	-3.272e-05	-3.585e-06	-3.188e-05	-1.759e-05
2.093e-06	1.469e-06	-1.912e-05	-1.08e-05	-6.166e-05	-3.914e-05	-3.389e-05	-2.999e-06	-3.318e-05	-1.791e-05
2.093e-06	9.808e-07	-1.815e-05	-1.178e-05	-6.127e-05	-3.797e-05	-3.506e-05	-2.609e-06	-3.448e-05	-1.856e-05
1.41e-06	-3.864e-07	-1.75e-05	-1.341e-05	-6.127e-05	-3.524e-05	-3.604e-05	-1.437e-06	-3.676e-05	-2.019e-05
6.283e-07	-1.07e-06	-1.782e-05	-1.471e-05	-6.224e-05	-3.309e-05	-3.643e-05	-1.046e-06	-3.969e-05	-2.117e-05
2.377e-07	-1.461e-06	-1.815e-05	-1.569e-05	-6.205e-05	-3.094e-05	-3.78e-05	-8.511e-07	-4.099e-05	-2.084e-05
-9.342e-07	-1.949e-06	-1.88e-05	-1.699e-05	-6.088e-05	-3.016e-05	-3.702e-05	-4.604e-07	-4.099e-05	-2.117e-05
-2.594e-06	-2.34e-06	-1.75e-05	-1.829e-05	-6.01e-05	-3.231e-05	-3.799e-05	-1.632e-06	-4.132e-05	-2.084e-05
-3.083e-06	-2.73e-06	-1.685e-05	-2.024e-05	-5.873e-05	-3.367e-05	-3.78e-05	-3.39e-06	-4.034e-05	-1.987e-05
-3.473e-06	-2.34e-06	-1.75e-05	-2.285e-05	-5.756e-05	-3.387e-05	-3.682e-05	-5.734e-06	-4.034e-05	-1.824e-05
-3.571e-06	-2.242e-06	-1.88e-05	-2.61e-05	-5.697e-05	-3.192e-05	-3.702e-05	-8.273e-06	-4.034e-05	-1.563e-05
-3.278e-06	-2.535e-06	-2.271e-05	-2.643e-05	-5.56e-05	-3.114e-05	-3.663e-05	-9.64e-06	-3.936e-05	-1.433e-05
-3.376e-06	-2.144e-06	-2.694e-05	-2.545e-05	-5.443e-05	-2.996e-05	-3.663e-05	-1.023e-05	-3.839e-05	-1.303e-05
-2.692e-06	-1.754e-06	-2.857e-05	-2.285e-05	-5.267e-05	-2.918e-05	-3.76e-05	-1.101e-05	-3.708e-05	-1.238e-05
-1.813e-06	-2.888e-07	-2.987e-05	-2.155e-05	-5.092e-05	-2.938e-05	-3.838e-05	-1.198e-05	-3.481e-05	-1.075e-05
-9.342e-07	-9.346e-08	-3.084e-05	-1.862e-05	-4.935e-05	-2.938e-05	-3.76e-05	-1.198e-05	-3.285e-05	-1.01e-05
1.4e-07	-5.817e-07	-2.954e-05	-1.569e-05	-5.053e-05	-2.996e-05	-3.76e-05	-1.277e-05	-3.155e-05	-9.124e-06
1.702e-06	-8.747e-07	-3.019e-05	-1.471e-05	-4.955e-05	-2.918e-05	-3.604e-05	-1.277e-05	-2.96e-05	-8.799e-06
2.191e-06	-1.07e-06	-2.889e-05	-1.569e-05	-4.935e-05	-2.84e-05	-3.33e-05	-1.198e-05	-2.764e-05	-7.497e-06
2.874e-06	-4.841e-07	-2.759e-05	-1.862e-05	-4.838e-05	-2.625e-05	-3.389e-05	-1.101e-05	-2.667e-05	-7.497e-06
4.339e-06	-7.771e-07	-2.629e-05	-1.894e-05	-4.603e-05	-2.371e-05	-3.35e-05	-1.081e-05	-2.504e-05	-6.845e-06
4.144e-06	-1.07e-06	-2.596e-05	-1.894e-05	-4.349e-05	-2.137e-05	-3.272e-05	-1.12e-05	-2.406e-05	-6.194e-06
3.949e-06	-1.168e-06	-2.498e-05	-1.959e-05	-4.193e-05	-2.078e-05	-3.174e-05	-1.179e-05	-2.341e-05	-6.52e-06
3.656e-06	-8.747e-07	-2.368e-05	-1.927e-05	-3.998e-05	-1.981e-05	-2.979e-05	-1.159e-05	-2.341e-05	-7.497e-06
2.191e-06	-1.656e-06	-2.368e-05	-1.959e-05	-3.978e-05	-1.883e-05	-2.745e-05	-1.12e-05	-2.537e-05	-9.124e-06
1.898e-06	-2.633e-06	-2.368e-05	-1.927e-05	-3.959e-05	-1.785e-05	-2.686e-05	-1.179e-05	-2.797e-05	-9.124e-06
1.019e-06	-2.828e-06	-2.336e-05	-1.862e-05	-3.959e-05	-1.707e-05	-2.413e-05	-1.062e-05	-3.122e-05	-9.775e-06
3.353e-07	-1.949e-06	-2.271e-05	-1.764e-05	-4.056e-05	-1.707e-05	-2.217e-05	-9.445e-06	-3.513e-05	-1.075e-05
6.283e-07	-1.461e-06	-2.14e-05	-1.601e-05	-3.998e-05	-1.766e-05	-2.1e-05	-9.64e-06	-3.806e-05	-1.173e-05
7.259e-07	-1.265e-06	-2.043e-05	-1.503e-05	-3.705e-05	-1.844e-05	-1.983e-05	-9.64e-06	-3.969e-05	-1.173e-05
3.353e-07	-1.265e-06	-2.108e-05	-1.406e-05	-3.568e-05	-1.961e-05	-2.159e-05	-9.64e-06	-4.164e-05	-1.27e-05
3.353e-07	-1.07e-06	-2.173e-05	-1.243e-05	-3.431e-05	-1.961e-05	-2.256e-05	-9.835e-06	-4.229e-05	-1.401e-05
2.191e-06	-1.168e-06	-2.336e-05	-1.178e-05	-3.217e-05	-1.824e-05	-2.041e-05	-9.249e-06	-4.294e-05	-1.368e-05
3.265e-06	-1.558e-06	-2.498e-05	-1.243e-05	-3.002e-05	-1.649e-05	-1.924e-05	-8.859e-06	-4.262e-05	-1.27e-05
4.144e-06	-8.747e-07	-2.596e-05	-1.243e-05	-2.904e-05	-1.434e-05	-1.807e-05	-7.687e-06	-4.099e-05	-1.108e-05
4.242e-06	4.196e-09	-2.694e-05	-1.178e-05	-2.748e-05	-1.278e-05	-1.612e-05	-6.515e-06	-4.001e-05	-8.799e-06
3.753e-06	6.878e-07	-2.759e-05	-1.178e-05	-2.67e-05	-1.102e-05	-1.651e-05	-5.148e-06	-3.936e-05	-7.822e-06
3.265e-06	9.808e-07	-2.694e-05	-1.178e-05	-2.553e-05	-9.846e-06	-1.651e-05	-3.976e-06	-3.969e-05	-8.799e-06
2.484e-06	1.078e-06	-2.694e-05	-1.145e-05	-2.435e-05	-1.004e-05	-1.534e-05	-1.828e-06	-3.774e-05	-9.775e-06
2.288e-06	2.972e-07	-2.564e-05	-1.145e-05	-2.338e-05	-1.18e-05	-1.416e-05	-8.511e-07	-3.774e-05	-1.14e-05
2.874e-06	-9.346e-08	-2.629e-05	-1.178e-05	-2.24e-05	-1.18e-05	-1.338e-05	5.161e-07	-3.481e-05	-1.14e-05
2.972e-06	-5.817e-07	-2.564e-05	-1.341e-05	-2.22e-05	-9.651e-06	-1.182e-05	2.665e-06	-3.383e-05	-1.075e-05
2.679e-06	-9.346e-08	-2.531e-05	-1.373e-05	-2.357e-05	-7.112e-06	-1.045e-05	4.032e-06	-3.415e-05	-1.173e-05
3.167e-06	1.078e-06	-2.498e-05	-1.438e-05	-2.318e-05	-5.549e-06	-8.696e-06	5.594e-06	-3.415e-05	-1.238e-05
2.874e-06	1.664e-06	-2.466e-05	-1.536e-05	-2.24e-05	-4.378e-06	-6.938e-06	6.961e-06	-3.643e-05	-1.368e-05
2.386e-06	1.176e-06	-2.531e-05	-1.536e-05	-2.045e-05	-3.401e-06	-6.547e-06	7.547e-06	-3.936e-05	-1.498e-05
2.191e-06	8.831e-07	-2.564e-05	-1.601e-05	-1.81e-05	-2.62e-06	-5.961e-06	8.133e-06	-4.164e-05	-1.694e-05
1.214e-06	8.831e-07	-2.726e-05	-1.764e-05	-1.615e-05	-3.206e-06	-4.789e-06	9.11e-06	-4.359e-05	-1.791e-05
1.312e-06	1.274e-06	-2.889e-05	-1.927e-05	-1.556e-05	-4.378e-06	-4.985e-06	8.719e-06	-4.652e-05	-1.889e-05
2.093e-06	1.957e-06	-3.117e-05	-2.155e-05	-1.42e-05	-3.987e-06	-5.18e-06	8.329e-06	-4.815e-05	-1.987e-05
2.093e-06	1.664e-06	-3.41e-05	-2.513e-05	-1.381e-05	-2.815e-06	-3.813e-06	8.524e-06	-4.88e-05	-1.954e-05
1.995e-06	6.878e-07	-3.67e-05	-2.903e-05	-1.342e-05	-2.229e-06	-4.399e-06	8.719e-06	-4.88e-05	-1.922e-05
2.093e-06	4.925e-07	-3.963e-05	-3.164e-05	-1.244e-05	-1.253e-06	-3.227e-06	8.915e-06	-4.88e-05	-1.987e-05
1.507e-06	1.469e-06	-4.256e-05	-3.424e-05	-1.146e-05	-1.253e-06	-2.25e-06	1.009e-05	-4.88e-05	-2.117e-05
1.41e-06	2.153e-06	-4.484e-05	-3.489e-05	-1.068e-05	-2.034e-06	-2.641e-06	1.067e-05	-4.815e-05	-2.182e-05
1.702e-06	1.957e-06	-4.875e-05	-3.522e-05	-9.705e-06	-3.01e-06	-1.664e-06	1.126e-05	-4.652e-05	-2.019e-05
1.117e-06	1.86e-06	-5.2e-05	-3.652e-05	-9.119e-06	-2.62e-06	-8.831e-07	1.087e-05	-4.425e-05	-1.922e-05
9.212e-07	1.567e-06	-5.363e-05	-3.782e-05	-9.51e-06	-2.62e-06	-1.469e-06	1.067e-05	-4.327e-05	-1.889e-05
2.377e-07	4.197e-09	-5.493e-05	-3.815e-05	-8.728e-06	-2.034e-06	-1.86e-06	1.087e-05	-4.099e-05	-1.824e-05
-1.325e-06	-1.656e-06	-5.428e-05	-3.717e-05	-8.924e-06	-2.62e-06	-2.836e-06	1.184e-05	-3.936e-05	-1.791e-05
-2.887e-06	-3.121e-06	-5.135e-05	-3.522e-05	-9.119e-06	-3.596e-06	-4.985e-06	1.204e-05	-3.839e-05	-1.759e-05
-3.669e-06	-3.511e-06	-4.907e-05	-3.131e-05	-8.142e-06	-4.378e-06	-6.547e-06	1.204e-05	-3.774e-05	-1.661e-05
-4.255e-06	-3.511e-06	-4.517e-05	-2.806e-05	-6.775e-06	-3.596e-06	-6.352e-06	1.087e-05	-3.774e-05	-1.531e-05
-3.962e-06	-2.242e-06	-4.159e-05	-2.545e-05	-5.799e-06	-3.792e-06	-7.719e-06	1.067e-05	-3.741e-05	-1.531e-05
-4.157e-06	-1.754e-06	-3.638e-05	-2.447e-05	-4.236e-06	-3.596e-06	-6.352e-06	1.126e-05	-3.676e-05	-1.563e-05
-4.645e-06	-2.144e-06	-3.215e-05	-2.317e-05	-3.846e-06	-3.596e-06	-5.571e-06	1.048e-05	-3.774e-05	-1.759e-05
-3.962e-06	-3.023e-06	-2.759e-05	-2.187e-05	-3.65e-06	-2.62e-06	-4.203e-06	9.501e-06	-3.774e-05	-1.889e-05
-3.766e-06	-3.902e-06	-2.466e-05	-2.22e-05	-3.846e-06	-2.034e-06	-1.469e-06	9.891e-06	-3.806e-05	-2.019e-05
-3.571e-06	-4.586e-06	-2.238e-05	-2.122e-05	-4.627e-06	-2.424e-06	9.345e-08	1.067e-05	-3.871e-05	-2.182e-05
-3.18e-06	-3.707e-06	-2.271e-05	-1.992e-05	-3.846e-06	-3.401e-06	-6.878e-07	1.087e-05	-3.904e-05	-2.28e-05
-3.278e-06	-3.121e-06	-2.368e-05	-1.959e-05	-3.26e-06	-3.01e-06	-8.831e-07	1.106e-05	-3.969e-05	-2.214e-05
-3.278e-06	-2.144e-06	-2.531e-05	-2.024e-05	-3.455e-06	-2.424e-06	-2.055e-06	1.048e-05	-4.066e-05	-2.019e-05
-3.278e-06	-1.168e-06	-2.564e-05	-2.057e-05	-3.26e-06	-8.619e-07	-3.422e-06	9.11e-06	-4.164e-05	-1.629e-05
-3.669e-06	-4.841e-07	-2.694e-05	-2.122e-05	-2.478e-06	5.053e-07	-4.008e-06	8.524e-06	-4.229e-05	-1.433e-05
-4.255e-06	-7.771e-07	-2.824e-05	-2.122e-05	-3.064e-06	1.146e-07	-6.742e-06	7.743e-06	-4.327e-05	-1.368e-05
-3.864e-06	-7.771e-07	-2.791e-05	-1.992e-05	-3.846e-06	3.099e-07	-9.282e-06	6.376e-06	-4.197e-05	-1.401e-05
-3.864e-06	-5.817e-07	-2.694e-05	-1.829e-05	-3.846e-06	-2.76e-07	-9.477e-06	6.18e-06	-4.066e-05	-1.368e-05
-2.692e-06	-3.864e-07	-2.596e-05	-1.634e-05	-4.627e-06	-2.76e-07	-1.182e-05	4.032e-06	-3.969e-05	-1.238e-05
-1.032e-06	1.078e-06	-2.564e-05	-1.406e-05	-4.236e-06	1.091e-06	-1.299e-05	1.493e-06	-3.969e-05	-1.27e-05
4.33e-07	1.371e-06	-2.531e-05	-1.341e-05	-3.65e-06	2.654e-06	-1.221e-05	-6.981e-08	-3.708e-05	-1.173e-05
1.41e-06	9.808e-07	-2.433e-05	-1.145e-05	-2.283e-06	2.458e-06	-1.299e-05	-1.828e-06	-3.643e-05	-1.14e-05
2.386e-06	6.878e-07	-2.303e-05	-1.048e-05	-1.111e-06	1.677e-06	-1.455e-05	-3.976e-06	-3.546e-05	-1.043e-05
2.288e-06	-9.346e-08	-2.043e-05	-9.501e-06	4.513e-07	1.287e-06	-1.436e-05	-4.562e-06	-3.578e-05	-8.799e-06
1.8e-06	-4.841e-07	-1.652e-05	-8.85e-06	1.428e-06	1.482e-06	-1.495e-05	-4.757e-06	-3.643e-05	-8.148e-06
2.288e-06	-5.817e-07	-1.196e-05	-7.222e-06	2.99e-06	2.654e-06	-1.514e-05	-2.804e-06	-3.643e-05	-8.473e-06
1.605e-06	-1.265e-06	-9.685e-06	-4.944e-06	3.381e-06	3.826e-06	-1.495e-05	-4.604e-07	-3.708e-05	-8.148e-06
1.214e-06	-1.07e-06	-8.057e-06	-4.944e-06	3.381e-06	5.779e-06	-1.592e-05	-8.511e-07	-3.676e-05	-8.473e-06
1.019e-06	-7.771e-07	-7.406e-06	-5.595e-06	3.576e-06	8.122e-06	-1.495e-05	-3.39e-06	-3.611e-05	-9.45e-06
9.212e-07	4.198e-09	-7.406e-06	-6.897e-06	3.772e-06	8.708e-06	-1.338e-05	-5.343e-06	-3.578e-05	-9.775e-06
1.312e-06	1.995e-07	-6.755e-06	-7.222e-06	4.162e-06	7.732e-06	-1.455e-05	-6.906e-06	-3.611e-05	-9.775e-06
1.41e-06	1.019e-07	-7.732e-06	-7.548e-06	4.943e-06	6.365e-06	-1.553e-05	-7.687e-06	-3.741e-05	-1.043e-05
1.605e-06	-4.841e-07	-8.383e-06	-7.222e-06	5.334e-06	5.779e-06	-1.631e-05	-8.468e-06	-3.969e-05	-1.14e-05
1.8e-06	-7.771e-07	-1.001e-05	-6.897e-06	5.334e-06	5.583e-06	-1.885e-05	-9.835e-06	-4.099e-05	-1.336e-05
2.484e-06	-1.911e-07	-1.196e-05	-7.873e-06	6.311e-06	6.365e-06	-1.983e-05	-1.042e-05	-4.359e-05	-1.433e-05
2.679e-06	-9.346e-08	-1.294e-05	-7.873e-06	7.092e-06	7.537e-06	-2.022e-05	-1.12e-05	-4.62e-05	-1.629e-05
3.851e-06	1.995e-07	-1.229e-05	-8.199e-06	7.678e-06	9.294e-06	-2.198e-05	-1.14e-05	-4.685e-05	-1.759e-05
5.316e-06	4.925e-07	-1.099e-05	-7.873e-06	9.631e-06	1.125e-05	-2.217e-05	-1.159e-05	-4.75e-05	-1.694e-05
6.39e-06	6.878e-07	-9.359e-06	-7.873e-06	1.119e-05	1.301e-05	-2.198e-05	-1.296e-05	-4.848e-05	-1.726e-05
6.683e-06	6.878e-07	-6.755e-06	-8.524e-06	1.237e-05	1.32e-05	-2.159e-05	-1.355e-05	-5.043e-05	-1.726e-05
6.488e-06	4.925e-07	-5.779e-06	-6.897e-06	1.432e-05	1.34e-05	-1.944e-05	-1.355e-05	-5.043e-05	-1.726e-05
5.511e-06	4.195e-09	-4.802e-06	-4.944e-06	1.432e-05	1.281e-05	-1.768e-05	-1.433e-05	-5.011e-05	-1.889e-05
4.437e-06	-4.841e-07	-5.128e-06	-1.688e-06	1.334e-05	1.203e-05	-1.729e-05	-1.374e-05	-5.076e-05	-2.117e-05
3.167e-06	-2.888e-07	-5.453e-06	1.241e-06	1.412e-05	1.222e-05	-1.651e-05	-1.394e-05	-4.978e-05	-2.28e-05
1.995e-06	-9.346e-08	-5.779e-06	2.218e-06	1.373e-05	1.457e-05	-1.67e-05	-1.394e-05	-4.945e-05	-2.475e-05
3.0457e-06	7.37028e-06	-4.151e-06	1.567e-06	1.412e-05	1.769e-05	-1.768e-05	-1.355e-05	-4.848e-05	-2.638e-05
3.07479e-06	7.40436e-06	-3.5e-06	1.892e-06	1.471e-05	2.004e-05	-1.768e-05	-1.355e-05	-4.913e-05	-2.735e-05
3.10389e-06	7.43844e-06	-2.198e-06	1.241e-06	1.53e-05	2.004e-05	-1.768e-05	-1.413e-05	-5.076e-05	-2.996e-05
3.13298e-06	7.47252e-06	-2.523e-06	1.241e-06	1.51e-05	1.906e-05	-1.807e-05	-1.472e-05	-5.173e-05	-3.093e-05
3.16207e-06	7.50659e-06	-3.174e-06	5.903e-07	1.725e-05	1.906e-05	-1.729e-05	-1.569e-05	-5.173e-05	-3.321e-05
3.19116e-06	7.54067e-06	-2.523e-06	2.648e-07	1.725e-05	1.906e-05	-1.729e-05	-1.609e-05	-5.238e-05	-3.419e-05
3.22025e-06	7.57475e-06	-2.849e-06	-6.072e-08	1.803e-05	1.906e-05	-1.827e-05	-1.667e-05	-5.238e-05	-3.386e-05
3.24934e-06	7.60883e-06	-2.849e-06	-1.037e-06	1.783e-05	1.886e-05	-1.768e-05	-1.687e-05	-5.206e-05	-3.354e-05
3.27843e-06	7.6429e-06	-3.826e-06	-2.339e-06	1.803e-05	1.828e-05	-1.748e-05	-1.687e-05	-5.238e-05	-3.256e-05
3.30752e-06	7.67698e-06	-6.104e-06	-3.641e-06	1.783e-05	1.75e-05	-1.67e-05	-1.609e-05	-5.076e-05	-3.061e-05
3.33662e-06	7.71106e-06	-8.057e-06	-5.269e-06	1.803e-05	1.711e-05	-1.495e-05	-1.452e-05	-4.945e-05	-2.8e-05
3.36571e-06	7.74514e-06	-9.034e-06	-6.897e-06	1.705e-05	1.691e-05	-1.514e-05	-1.374e-05	-4.718e-05	-2.638e-05
3.3948e-06	7.77921e-06	-1.034e-05	-6.897e-06	1.647e-05	1.711e-05	-1.475e-05	-1.335e-05	-4.359e-05	-2.475e-05
3.42389e-06	7.81329e-06	-1.196e-05	-7.222e-06	1.549e-05	1.574e-05	-1.319e-05	-1.218e-05	-4.001e-05	-2.247e-05
3.45298e-06	7.84737e-06	-1.327e-05	-7.222e-06	1.373e-05	1.457e-05	-1.338e-05	-1.198e-05	-3.643e-05	-1.987e-05
3.48207e-06	7.88145e-06	-1.392e-05	-7.548e-06	1.256e-05	1.418e-05	-1.377e-05	-1.218e-05	-3.35e-05	-1.726e-05
3.51116e-06	7.91552e-06	-1.522e-05	-8.524e-06	1.119e-05	1.34e-05	-1.26e-05	-1.218e-05	-2.96e-05	-1.531e-05
3.54025e-06	7.9496e-06	-1.62e-05	-8.524e-06	1.022e-05	1.34e-05	-1.202e-05	-1.159e-05	-2.569e-05	-1.303e-05
3.56935e-06	7.98368e-06	-1.782e-05	-9.826e-06	9.24e-06	1.301e-05	-1.045e-05	-9.64e-06	-2.113e-05	-1.14e-05
3.59844e-06	8.01776e-06	-1.815e-05	-1.048e-05	8.264e-06	1.32e-05	-1.084e-05	-1.023e-05	-1.755e-05	-1.075e-05
3.62753e-06	8.05184e-06	-1.88e-05	-1.08e-05	6.311e-06	1.261e-05	-1.202e-05	-1.042e-05	-1.462e-05	-9.124e-06
3.65662e-06	8.08591e-06	-1.847e-05	-1.08e-05	5.139e-06	1.183e-05	-1.143e-05	-9.64e-06	-1.202e-05	-7.822e-06
3.68571e-06	8.11999e-06	-1.782e-05	-1.21e-05	4.748e-06	1.047e-05	-1.065e-05	-8.468e-06	-1.202e-05	-7.497e-06
3.7148e-06	8.15407e-06	-1.62e-05	-1.243e-05	4.162e-06	9.49e-06	-1.026e-05	-7.101e-06	-1.267e-05	-7.497e-06
3.74389e-06	8.18815e-06	-1.392e-05	-1.276e-05	3.576e-06	8.513e-06	-1.006e-05	-5.734e-06	-1.527e-05	-4.567e-06
3.77298e-06	8.22222e-06	-1.489e-05	-1.308e-05	2.014e-06	7.146e-06	-1.026e-05	-5.343e-06	-1.658e-05	-6.606e-07
3.80208e-06	8.2563e-06	-1.424e-05	-1.276e-05	4.513e-07	4.802e-06	-1.084e-05	-5.539e-06	-1.788e-05	3.571e-06
3.83117e-06	8.29038e-06	-1.489e-05	-1.406e-05	-1.697e-06	1.872e-06	-1.143e-05	-5.929e-06	-1.69e-05	5.85e-06
3.86026e-06	8.32446e-06	-1.522e-05	-1.373e-05	-3.26e-06	-6.666e-07	-1.26e-05	-7.492e-06	-1.658e-05	5.199e-06
3.88935e-06	8.35853e-06	-1.489e-05	-1.243e-05	-4.627e-06	-2.62e-06	-1.416e-05	-9.445e-06	-1.462e-05	5.199e-06
3.91844e-06	8.39261e-06	-1.554e-05	-1.145e-05	-5.408e-06	-3.987e-06	-1.319e-05	-9.249e-06	-1.267e-05	5.199e-06
3.94753e-06	8.42669e-06	-1.652e-05	-1.113e-05	-6.385e-06	-4.182e-06	-1.338e-05	-9.445e-06	-1.234e-05	5.85e-06
3.97662e-06	8.46077e-06	-1.652e-05	-1.015e-05	-7.166e-06	-3.206e-06	-1.436e-05	-9.64e-06	-1.332e-05	6.826e-06
4.00571e-06	8.49484e-06	-1.717e-05	-8.85e-06	-7.947e-06	-2.62e-06	-1.436e-05	-1.062e-05	-1.267e-05	7.152e-06
4.03481e-06	8.52892e-06	-1.717e-05	-7.873e-06	-8.728e-06	-2.424e-06	-1.612e-05	-1.12e-05	-1.104e-05	7.803e-06
4.0639e-06	8.563e-06	-1.587e-05	-6.571e-06	-9.705e-06	-3.01e-06	-1.709e-05	-1.237e-05	-9.741e-06	8.78e-06
4.09299e-06	8.59708e-06	-1.457e-05	-6.571e-06	-9.119e-06	-3.596e-06	-1.69e-05	-1.237e-05	-7.462e-06	1.073e-05
4.12208e-06	8.63116e-06	-1.229e-05	-5.595e-06	-8.533e-06	-4.182e-06	-1.748e-05	-1.257e-05	-5.834e-06	1.171e-05
4.15117e-06	8.66523e-06	-9.359e-06	-4.618e-06	-7.361e-06	-4.378e-06	-1.729e-05	-1.296e-05	-3.881e-06	1.236e-05
4.18026e-06	8.69931e-06	-6.755e-06	-2.339e-06	-6.385e-06	-4.963e-06	-1.67e-05	-1.335e-05	-2.579e-06	1.269e-05
4.20935e-06	8.73339e-06	-3.174e-06	-3.862e-07	-7.361e-06	-5.549e-06	-1.631e-05	-1.355e-05	-1.928e-06	1.269e-05
4.23844e-06	8.76747e-06	1.057e-06	2.648e-07	-8.142e-06	-6.135e-06	-1.67e-05	-1.277e-05	-1.602e-06	1.269e-05
4.26753e-06	8.80154e-06	3.01e-06	5.903e-07	-9.705e-06	-5.745e-06	-1.495e-05	-1.159e-05	-2.579e-06	1.203e-05
4.29663e-06	8.83562e-06	3.336e-06	2.648e-07	-1.01e-05	-5.94e-06	-1.455e-05	-1.14e-05	-3.881e-06	1.041e-05
4.32572e-06	8.8697e-06	4.638e-06	5.903e-07	-1.01e-05	-6.331e-06	-1.416e-05	-1.062e-05	-5.183e-06	9.105e-06
4.35481e-06	8.90378e-06	5.289e-06	1.241e-06	-8.728e-06	-6.721e-06	-1.104e-05	-1.003e-05	-5.509e-06	8.454e-06
4.3839e-06	8.93785e-06	7.568e-06	2.218e-06	-8.728e-06	-8.088e-06	-8.5e-06	-9.249e-06	-7.787e-06	7.477e-06
4.41299e-06	8.97193e-06	8.87e-06	2.869e-06	-7.947e-06	-8.674e-06	-4.985e-06	-7.687e-06	-9.741e-06	6.175e-06
4.44208e-06	9.00601e-06	7.893e-06	2.543e-06	-8.338e-06	-8.284e-06	-1.078e-06	-7.101e-06	-1.007e-05	5.524e-06
4.47117e-06	9.04009e-06	7.893e-06	1.567e-06	-9.314e-06	-7.503e-06	-8.831e-07	-7.492e-06	-1.104e-05	4.873e-06
4.50026e-06	9.07416e-06	7.893e-06	5.903e-07	-1.068e-05	-6.917e-06	-1.019e-07	-9.054e-06	-1.234e-05	4.873e-06
4.52936e-06	9.10824e-06	6.917e-06	5.903e-07	-1.068e-05	-6.135e-06	2.633e-06	-8.468e-06	-1.3e-05	4.222e-06
4.55845e-06	9.14232e-06	6.266e-06	1.241e-06	-1.107e-05	-6.526e-06	4.195e-06	-7.296e-06	-1.267e-05	3.246e-06
4.58754e-06	9.1764e-06	5.94e-06	3.846e-06	-1.107e-05	-7.112e-06	7.125e-06	-5.343e-06	-1.072e-05	3.571e-06
4.61663e-06	9.21048e-06	6.591e-06	5.799e-06	-1.107e-05	-8.088e-06	9.078e-06	-2.414e-06	-9.741e-06	3.897e-06
4.64572e-06	9.24455e-06	7.893e-06	8.403e-06	-1.205e-05	-8.674e-06	9.859e-06	-4.604e-07	-9.415e-06	3.571e-06
4.67481e-06	9.27863e-06	9.521e-06	9.379e-06	-1.068e-05	-9.065e-06	1.005e-05	-2.651e-07	-1.007e-05	2.595e-06
4.7039e-06	9.31271e-06	1.147e-05	1.036e-05	-1.107e-05	-8.87e-06	7.906e-06	5.161e-07	-1.039e-05	6.415e-07
4.73299e-06	9.34679e-06	1.375e-05	1.198e-05	-1.224e-05	-8.674e-06	4.195e-06	1.102e-06	-1.169e-05	-9.861e-07
4.76209e-06	9.38086e-06	1.571e-05	1.263e-05	-1.166e-05	-1.004e-05	3.414e-06	1.883e-06	-1.267e-05	-1.637e-06
4.79118e-06	9.41494e-06	1.766e-05	1.491e-05	-1.068e-05	-1.18e-05	3.218e-06	2.274e-06	-1.332e-05	-9.861e-07
4.82027e-06	9.44902e-06	1.929e-05	1.654e-05	-1.107e-05	-1.239e-05	3.023e-06	1.688e-06	-1.397e-05	-6.606e-07
4.84936e-06	9.4831e-06	2.157e-05	1.654e-05	-1.088e-05	-1.18e-05	4e-06	1.883e-06	-1.365e-05	3.16e-07
4.87845e-06	9.51717e-06	2.254e-05	1.654e-05	-1.049e-05	-1.16e-05	4.781e-06	1.688e-06	-1.495e-05	-9.541e-09
4.90754e-06	9.55125e-06	2.417e-05	1.752e-05	-1.107e-05	-1.141e-05	4e-06	2.274e-06	-1.593e-05	-9.861e-07
4.93663e-06	9.58533e-06	2.645e-05	1.849e-05	-9.9e-06	-1.063e-05	5.562e-06	2.86e-06	-1.69e-05	-1.637e-06
4.96572e-06	9.61941e-06	2.677e-05	1.849e-05	-9.705e-06	-1.141e-05	7.32e-06	3.836e-06	-1.788e-05	-2.614e-06
4.99482e-06	9.65348e-06	2.873e-05	1.915e-05	-9.314e-06	-1.121e-05	6.539e-06	4.227e-06	-2.081e-05	-3.59e-06
5.02391e-06	9.68756e-06	2.873e-05	1.849e-05	-1.029e-05	-1.063e-05	8.883e-06	5.204e-06	-2.309e-05	-4.567e-06
5.053e-06	9.72164e-06	2.84e-05	1.882e-05	-1.029e-05	-1.121e-05	1.162e-05	7.352e-06	-2.537e-05	-4.892e-06
5.08209e-06	9.75572e-06	2.71e-05	1.849e-05	-1.205e-05	-1.297e-05	1.357e-05	7.352e-06	-2.569e-05	-4.892e-06
5.11118e-06	9.7898e-06	2.645e-05	1.687e-05	-1.185e-05	-1.317e-05	1.63e-05	7.743e-06	-2.439e-05	-5.218e-06
5.14027e-06	9.82387e-06	2.677e-05	1.394e-05	-1.263e-05	-1.414e-05	1.709e-05	8.524e-06	-2.406e-05	-4.892e-06
5.16936e-06	9.85795e-06	2.677e-05	1.231e-05	-1.303e-05	-1.571e-05	1.63e-05	8.719e-06	-2.341e-05	-4.892e-06
5.19845e-06	9.89203e-06	2.515e-05	1.133e-05	-1.303e-05	-1.785e-05	1.748e-05	9.891e-06	-2.276e-05	-5.218e-06
5.22755e-06	9.92611e-06	2.189e-05	1.361e-05	-1.263e-05	-1.864e-05	1.65e-05	1.106e-05	-2.276e-05	-3.59e-06
5.25664e-06	9.96018e-06	1.994e-05	1.459e-05	-1.224e-05	-1.922e-05	1.416e-05	1.106e-05	-2.406e-05	-1.963e-06
5.28573e-06	9.99426e-06	1.733e-05	1.589e-05	-1.322e-05	-1.922e-05	1.513e-05	1.106e-05	-2.341e-05	-6.606e-07
5.31482e-06	1.00283e-05	1.668e-05	1.784e-05	-1.42e-05	-1.844e-05	1.396e-05	1.087e-05	-2.276e-05	-6.606e-07
5.34391e-06	1.00624e-05	1.766e-05	1.98e-05	-1.517e-05	-1.805e-05	1.181e-05	9.696e-06	-2.276e-05	-1.312e-06
5.373e-06	1.00965e-05	1.864e-05	2.012e-05	-1.576e-05	-1.766e-05	1.201e-05	8.329e-06	-2.178e-05	-1.637e-06
5.40209e-06	1.01306e-05	2.189e-05	1.849e-05	-1.615e-05	-1.824e-05	1.181e-05	7.938e-06	-2.211e-05	-1.963e-06
5.43118e-06	1.01646e-05	2.547e-05	1.719e-05	-1.615e-05	-1.864e-05	1.318e-05	8.719e-06	-2.146e-05	-1.312e-06
5.46028e-06	1.01987e-05	2.775e-05	1.719e-05	-1.615e-05	-1.922e-05	1.748e-05	9.891e-06	-2.113e-05	-1.637e-06
5.48937e-06	1.02328e-05	2.873e-05	1.784e-05	-1.615e-05	-2.02e-05	2.041e-05	1.009e-05	-2.178e-05	-3.265e-06
5.51846e-06	1.02669e-05	2.873e-05	1.849e-05	-1.615e-05	-2.157e-05	2.158e-05	1.126e-05	-2.276e-05	-3.916e-06
5.54755e-06	1.0301e-05	2.808e-05	1.784e-05	-1.556e-05	-2.196e-05	2.334e-05	1.282e-05	-2.374e-05	-3.916e-06
5.57664e-06	1.0335e-05	2.677e-05	1.849e-05	-1.615e-05	-2.313e-05	2.334e-05	1.184e-05	-2.439e-05	-3.265e-06
5.60573e-06	1.03691e-05	2.58e-05	1.849e-05	-1.439e-05	-2.215e-05	2.334e-05	1.282e-05	-2.537e-05	-2.614e-06
5.63482e-06	1.04032e-05	2.515e-05	1.784e-05	-1.303e-05	-2.059e-05	2.314e-05	1.321e-05	-2.699e-05	-3.916e-06
5.66391e-06	1.04373e-05	2.287e-05	1.622e-05	-1.205e-05	-1.981e-05	2.177e-05	1.263e-05	-2.797e-05	-4.892e-06
5.69301e-06	1.04713e-05	1.994e-05	1.556e-05	-1.049e-05	-1.942e-05	2.177e-05	1.223e-05	-2.764e-05	-4.892e-06
5.7221e-06	1.05054e-05	1.603e-05	1.426e-05	-9.705e-06	-1.824e-05	2.353e-05	1.341e-05	-2.732e-05	-5.218e-06
5.75119e-06	1.05395e-05	1.18e-05	1.166e-05	-1.01e-05	-1.727e-05	2.158e-05	1.497e-05	-2.699e-05	-4.241e-06
5.78028e-06	1.05736e-05	8.544e-06	9.054e-06	-9.9e-06	-1.688e-05	2.138e-05	1.614e-05	-2.537e-05	-3.59e-06
5.80937e-06	1.06077e-05	5.94e-06	7.101e-06	-9.119e-06	-1.766e-05	2.334e-05	1.731e-05	-2.374e-05	-3.59e-06
5.83846e-06	1.06417e-05	4.638e-06	4.497e-06	-9.705e-06	-1.922e-05	2.216e-05	1.673e-05	-2.309e-05	-2.614e-06
5.86755e-06	1.06758e-05	3.01e-06	2.543e-06	-9.119e-06	-1.981e-05	2.138e-05	1.595e-05	-2.211e-05	-1.963e-06
5.89664e-06	1.07099e-05	2.359e-06	1.892e-06	-9.314e-06	-2.059e-05	2.099e-05	1.556e-05	-2.113e-05	-1.312e-06
5.92574e-06	1.0744e-05	3.01e-06	2.543e-06	-9.9e-06	-2.254e-05	2.08e-05	1.575e-05	-1.983e-05	-1.312e-06
5.95483e-06	1.0778e-05	4.638e-06	3.52e-06	-1.029e-05	-2.313e-05	2.314e-05	1.848e-05	-1.755e-05	-1.312e-06
5.98392e-06	1.08121e-05	6.591e-06	3.52e-06	-1.049e-05	-2.352e-05	2.548e-05	2.161e-05	-1.56e-05	-9.539e-09
6.01301e-06	1.08462e-05	9.846e-06	4.822e-06	-1.049e-05	-2.293e-05	2.529e-05	2.376e-05	-1.43e-05	1.944e-06
6.0421e-06	1.08803e-05	1.278e-05	5.799e-06	-1.068e-05	-2.059e-05	2.724e-05	2.63e-05	-1.332e-05	2.595e-06
6.07119e-06	1.09144e-05	1.473e-05	6.124e-06	-9.51e-06	-1.805e-05	2.705e-05	2.669e-05	-1.462e-05	2.269e-06
6.10028e-06	1.09484e-05	1.636e-05	6.45e-06	-8.533e-06	-1.746e-05	2.587e-05	2.61e-05	-1.495e-05	9.67e-07
6.12937e-06	1.09825e-05	1.701e-05	8.077e-06	-6.385e-06	-1.492e-05	2.763e-05	2.434e-05	-1.397e-05	9.67e-07
6.15847e-06	1.10166e-05	1.864e-05	9.054e-06	-5.994e-06	-1.297e-05	2.861e-05	2.415e-05	-1.332e-05	2.595e-06
6.18756e-06	1.10507e-05	1.864e-05	9.379e-06	-4.822e-06	-1.082e-05	2.92e-05	2.395e-05	-1.495e-05	3.571e-06
6.21665e-06	1.10847e-05	1.766e-05	8.403e-06	-3.064e-06	-9.846e-06	3.212e-05	2.493e-05	-1.495e-05	4.873e-06
6.24574e-06	1.11188e-05	1.603e-05	6.45e-06	-1.111e-06	-8.284e-06	3.369e-05	2.61e-05	-1.56e-05	4.873e-06
6.27483e-06	1.11529e-05	1.408e-05	2.869e-06	2.56e-07	-6.331e-06	3.31e-05	2.727e-05	-1.527e-05	5.524e-06
6.30392e-06	1.1187e-05	1.147e-05	-6.071e-08	2.404e-06	-3.206e-06	3.232e-05	2.806e-05	-1.365e-05	6.501e-06
6.33301e-06	1.12211e-05	8.544e-06	-1.688e-06	4.358e-06	-1.838e-06	3.017e-05	2.727e-05	-1.169e-05	7.477e-06
6.3621e-06	1.12551e-05	5.615e-06	-2.014e-06	5.334e-06	-4.713e-07	2.802e-05	2.591e-05	-9.415e-06	8.78e-06
6.3912e-06	1.12892e-05	3.01e-06	-1.037e-06	5.529e-06	-8.068e-08	2.841e-05	2.649e-05	-9.089e-06	9.756e-06
6.42029e-06	1.13233e-05	4.063e-07	-1.037e-06	5.529e-06	-1.448e-06	2.959e-05	2.649e-05	-7.787e-06	1.041e-05
6.44938e-06	1.13574e-05	-2.448e-07	-1.037e-06	6.897e-06	-2.62e-06	3.154e-05	2.669e-05	-9.415e-06	8.78e-06
6.47847e-06	1.13914e-05	-1.547e-06	-2.339e-06	7.483e-06	-4.182e-06	3.466e-05	2.571e-05	-1.007e-05	7.803e-06
6.50756e-06	1.14255e-05	-1.872e-06	-3.967e-06	7.287e-06	-5.745e-06	3.545e-05	2.727e-05	-1.3e-05	5.524e-06
6.53665e-06	1.14596e-05	-1.872e-06	-4.944e-06	6.701e-06	-6.526e-06	3.505e-05	3.001e-05	-1.56e-05	2.92e-06
6.56574e-06	1.14937e-05	-2.198e-06	-5.269e-06	6.701e-06	-8.284e-06	3.505e-05	3.294e-05	-1.918e-05	-3.351e-07
6.59483e-06	1.15278e-05	-1.221e-06	-5.595e-06	5.529e-06	-9.651e-06	3.252e-05	3.391e-05	-2.439e-05	-3.916e-06
6.62393e-06	1.15618e-05	-2.448e-07	-5.595e-06	4.748e-06	-1.004e-05	3.076e-05	3.352e-05	-2.797e-05	-8.148e-06
6.65302e-06	1.15959e-05	1.057e-06	-5.269e-06	2.6e-06	-1.199e-05	3.154e-05	3.196e-05	-3.285e-05	-1.401e-05
6.68211e-06	1.163e-05	3.01e-06	-4.292e-06	4.513e-07	-1.375e-05	3.232e-05	3.079e-05	-3.936e-05	-1.987e-05
6.7112e-06	1.16641e-05	4.313e-06	-2.99e-06	-1.502e-06	-1.532e-05	3.427e-05	3.059e-05	-4.49e-05	-2.67e-05
6.74029e-06	1.16981e-05	4.313e-06	-3.316e-06	-3.26e-06	-1.649e-05	3.584e-05	3.098e-05	-4.848e-05	-3.289e-05
6.76938e-06	1.17322e-05	5.615e-06	-2.014e-06	-5.994e-06	-1.864e-05	3.388e-05	2.962e-05	-5.141e-05	-3.744e-05
6.79847e-06	1.17663e-05	6.266e-06	-7.118e-07	-8.338e-06	-2.039e-05	3.134e-05	2.825e-05	-5.303e-05	-4.07e-05
6.82756e-06	1.18004e-05	6.266e-06	-3.862e-07	-1.088e-05	-2.215e-05	2.861e-05	2.63e-05	-5.499e-05	-4.298e-05
6.85666e-06	1.18345e-05	6.266e-06	1.567e-06	-1.322e-05	-2.449e-05	2.431e-05	2.473e-05	-5.662e-05	-4.428e-05
6.88575e-06	1.18685e-05	5.94e-06	2.543e-06	-1.42e-05	-2.625e-05	2.275e-05	2.337e-05	-5.596e-05	-4.461e-05
6.91484e-06	1.19026e-05	5.615e-06	3.194e-06	-1.498e-05	-2.84e-05	2.295e-05	2.083e-05	-5.727e-05	-4.233e-05
6.94393e-06	1.19367e-05	5.94e-06	2.543e-06	-1.654e-05	-3.035e-05	2.314e-05	1.751e-05	-5.629e-05	-3.907e-05
6.97302e-06	1.19708e-05	4.313e-06	1.567e-06	-1.713e-05	-3.172e-05	2.295e-05	1.536e-05	-5.336e-05	-3.582e-05
7.00211e-06	1.20048e-05	2.359e-06	9.158e-07	-1.83e-05	-3.25e-05	2.119e-05	1.399e-05	-4.945e-05	-3.451e-05
7.0312e-06	1.20389e-05	1.708e-06	5.903e-07	-1.986e-05	-3.426e-05	1.767e-05	1.282e-05	-4.555e-05	-3.224e-05
7.06029e-06	1.2073e-05	2.034e-06	9.158e-07	-1.849e-05	-3.504e-05	1.591e-05	1.263e-05	-4.164e-05	-2.898e-05
7.08939e-06	1.21071e-05	2.685e-06	2.543e-06	-1.693e-05	-3.485e-05	1.513e-05	1.36e-05	-3.839e-05	-2.67e-05
7.11848e-06	1.21412e-05	3.661e-06	2.869e-06	-1.537e-05	-3.387e-05	1.513e-05	1.38e-05	-3.611e-05	-2.475e-05
7.14757e-06	1.21752e-05	4.638e-06	3.846e-06	-1.342e-05	-3.289e-05	1.748e-05	1.38e-05	-3.318e-05	-2.182e-05
7.17666e-06	1.22093e-05	5.289e-06	4.822e-06	-1.088e-05	-3.25e-05	1.904e-05	1.282e-05	-3.285e-05	-1.922e-05
7.20575e-06	1.22434e-05	6.266e-06	6.45e-06	-8.924e-06	-3.211e-05	1.767e-05	1.223e-05	-3.253e-05	-1.856e-05
7.23484e-06	1.22775e-05	7.568e-06	7.426e-06	-5.603e-06	-3.094e-05	1.728e-05	1.263e-05	-3.155e-05	-1.759e-05
7.26393e-06	1.23115e-05	9.195e-06	7.101e-06	-2.478e-06	-2.918e-05	1.396e-05	1.458e-05	-3.122e-05	-1.791e-05
7.29302e-06	1.23456e-05	1.05e-05	6.775e-06	-3.3e-07	-2.645e-05	1.142e-05	1.595e-05	-2.96e-05	-1.856e-05
7.32212e-06	1.23797e-05	1.115e-05	7.426e-06	1.428e-06	-2.489e-05	1.181e-05	1.653e-05	-2.96e-05	-1.824e-05
7.35121e-06	1.24138e-05	1.147e-05	7.101e-06	1.818e-06	-2.352e-05	1.259e-05	1.556e-05	-2.927e-05	-1.856e-05
7.3803e-06	1.24479e-05	1.05e-05	7.101e-06	3.967e-06	-2.254e-05	1.377e-05	1.458e-05	-2.927e-05	-1.726e-05
7.40939e-06	1.24819e-05	9.846e-06	6.45e-06	6.506e-06	-2e-05	1.63e-05	1.458e-05	-2.83e-05	-1.596e-05
7.43848e-06	1.2516e-05	9.195e-06	5.799e-06	7.092e-06	-1.844e-05	1.63e-05	1.38e-05	-2.764e-05	-1.498e-05
7.46757e-06	1.25501e-05	8.544e-06	6.45e-06	7.287e-06	-1.727e-05	1.396e-05	1.282e-05	-2.634e-05	-1.368e-05
7.49666e-06	1.25842e-05	7.568e-06	8.077e-06	8.264e-06	-1.571e-05	1.22e-05	1.302e-05	-2.471e-05	-1.238e-05
7.52575e-06	1.26182e-05	6.591e-06	9.054e-06	8.85e-06	-1.492e-05	8.492e-06	1.223e-05	-2.276e-05	-1.205e-05
7.55485e-06	1.26523e-05	7.568e-06	8.728e-06	1.002e-05	-1.434e-05	6.343e-06	1.126e-05	-1.886e-05	-9.124e-06
7.58394e-06	1.26864e-05	7.893e-06	8.403e-06	1.178e-05	-1.239e-05	6.148e-06	1.028e-05	-1.593e-05	-6.194e-06
7.61303e-06	1.27205e-05	6.266e-06	7.752e-06	1.334e-05	-1.043e-05	7.125e-06	9.11e-06	-1.137e-05	-3.59e-06
7.64212e-06	1.27546e-05	5.289e-06	7.752e-06	1.432e-05	-9.456e-06	7.711e-06	7.938e-06	-7.462e-06	-9.861e-07
7.67121e-06	1.27886e-05	4.313e-06	6.124e-06	1.51e-05	-8.87e-06	9.664e-06	8.133e-06	-2.579e-06	1.618e-06
7.7003e-06	1.28227e-05	3.987e-06	3.194e-06	1.647e-05	-8.479e-06	1.005e-05	8.915e-06	6.762e-07	2.269e-06
7.72939e-06	1.28568e-05	2.685e-06	-3.862e-07	1.92e-05	-8.479e-06	1.142e-05	9.501e-06	4.582e-06	3.246e-06
7.75848e-06	1.28909e-05	4.063e-07	-2.014e-06	2.272e-05	-7.698e-06	1.201e-05	1.087e-05	7.512e-06	4.222e-06
7.78758e-06	1.29249e-05	-1.547e-06	-2.99e-06	2.389e-05	-6.331e-06	1.045e-05	9.891e-06	9.465e-06	6.501e-06
7.81667e-06	1.2959e-05	-4.477e-06	-4.292e-06	2.584e-05	-3.987e-06	1.005e-05	8.719e-06	1.207e-05	8.128e-06
7.84576e-06	1.29931e-05	-9.359e-06	-6.571e-06	2.701e-05	-8.619e-07	1.142e-05	8.524e-06	1.305e-05	1.008e-05
7.87485e-06	1.30272e-05	-1.457e-05	-9.175e-06	2.858e-05	2.458e-06	1.201e-05	9.305e-06	1.467e-05	1.073e-05
7.90394e-06	1.30612e-05	-1.912e-05	-1.308e-05	3.092e-05	5.974e-06	1.416e-05	1.048e-05	1.598e-05	1.106e-05
7.93303e-06	1.30953e-05	-2.336e-05	-1.796e-05	3.346e-05	8.513e-06	1.611e-05	1.263e-05	1.598e-05	1.236e-05
7.96212e-06	1.31294e-05	-2.401e-05	-2.22e-05	3.483e-05	9.294e-06	1.572e-05	1.419e-05	1.532e-05	1.431e-05
7.99121e-06	1.31635e-05	-2.466e-05	-2.708e-05	3.815e-05	9.49e-06	1.533e-05	1.536e-05	1.565e-05	1.659e-05
8.02031e-06	1.31976e-05	-2.401e-05	-2.968e-05	4.186e-05	1.125e-05	1.435e-05	1.536e-05	1.467e-05	1.789e-05
8.0494e-06	1.32316e-05	-2.205e-05	-3.164e-05	4.459e-05	1.281e-05	1.279e-05	1.458e-05	1.467e-05	1.822e-05
8.07849e-06	1.32657e-05	-2.01e-05	-3.261e-05	4.615e-05	1.652e-05	1.416e-05	1.321e-05	1.532e-05	1.887e-05
8.10758e-06	1.32998e-05	-1.815e-05	-3.424e-05	4.694e-05	2.004e-05	1.513e-05	1.165e-05	1.532e-05	2.05e-05
8.13667e-06	1.33339e-05	-1.62e-05	-3.522e-05	4.869e-05	2.14e-05	1.474e-05	1.048e-05	1.63e-05	2.115e-05
8.16576e-06	1.33679e-05	-1.489e-05	-3.652e-05	5.201e-05	2.238e-05	1.552e-05	1.145e-05	1.825e-05	2.147e-05
8.19485e-06	1.3402e-05	-1.229e-05	-3.457e-05	5.494e-05	2.218e-05	1.591e-05	1.341e-05	1.793e-05	2.082e-05
8.22394e-06	1.34361e-05	-8.383e-06	-3.196e-05	5.651e-05	2.14e-05	1.455e-05	1.458e-05	1.598e-05	2.082e-05
8.25304e-06	1.34702e-05	-5.128e-06	-2.838e-05	5.787e-05	2.258e-05	1.474e-05	1.419e-05	1.598e-05	2.017e-05
8.28213e-06	1.35043e-05	-1.872e-06	-2.48e-05	5.787e-05	2.297e-05	1.337e-05	1.36e-05	1.663e-05	2.017e-05
8.31122e-06	1.35383e-05	2.685e-06	-2.089e-05	5.768e-05	2.511e-05	1.22e-05	1.243e-05	1.663e-05	1.985e-05
8.34031e-06	1.35724e-05	6.591e-06	-1.731e-05	5.807e-05	2.765e-05	1.416e-05	1.184e-05	1.76e-05	2.017e-05
8.3694e-06	1.36065e-05	1.115e-05	-1.341e-05	5.807e-05	2.961e-05	1.65e-05	1.223e-05	1.891e-05	1.92e-05
8.39849e-06	1.36406e-05	1.668e-05	-8.524e-06	5.846e-05	3.097e-05	1.826e-05	1.38e-05	1.956e-05	1.757e-05
8.42758e-06	1.36746e-05	2.157e-05	-3.316e-06	5.905e-05	3.195e-05	2.099e-05	1.634e-05	1.891e-05	1.562e-05
8.45667e-06	1.37087e-05	2.58e-05	-7.118e-07	5.963e-05	3.234e-05	2.119e-05	1.809e-05	1.598e-05	1.334e-05
8.48577e-06	1.37428e-05	2.938e-05	1.892e-06	6.041e-05	3.176e-05	2.021e-05	1.907e-05	1.402e-05	1.106e-05
8.51486e-06	1.37769e-05	3.231e-05	4.497e-06	6.315e-05	3.195e-05	2.002e-05	1.946e-05	1.174e-05	9.431e-06
8.54395e-06	1.3811e-05	3.686e-05	7.752e-06	6.393e-05	3.176e-05	2.021e-05	1.888e-05	9.14e-06	1.138e-05
8.57304e-06	1.3845e-05	3.882e-05	1.133e-05	6.51e-05	3.117e-05	2.021e-05	1.731e-05	6.861e-06	1.301e-05
8.60213e-06	1.38791e-05	3.947e-05	1.394e-05	6.53e-05	3.058e-05	2.216e-05	1.653e-05	5.559e-06	1.464e-05
8.63122e-06	1.39132e-05	4.012e-05	1.622e-05	6.471e-05	2.883e-05	2.314e-05	1.712e-05	3.606e-06	1.496e-05
8.66031e-06	1.39473e-05	4.045e-05	1.849e-05	6.334e-05	2.746e-05	2.373e-05	1.809e-05	3.28e-06	1.496e-05
8.6894e-06	1.39813e-05	4.077e-05	2.077e-05	6.197e-05	2.804e-05	2.49e-05	1.966e-05	3.931e-06	1.301e-05
8.7185e-06	1.40154e-05	4.175e-05	2.273e-05	6.08e-05	2.922e-05	2.236e-05	1.868e-05	4.582e-06	1.269e-05
8.74759e-06	1.40495e-05	4.272e-05	2.533e-05	5.963e-05	3.058e-05	2.099e-05	1.809e-05	7.187e-06	1.594e-05
8.77668e-06	1.40836e-05	4.338e-05	2.761e-05	5.905e-05	3.176e-05	1.982e-05	1.79e-05	8.814e-06	1.724e-05
8.80577e-06	1.41177e-05	4.435e-05	3.086e-05	5.826e-05	3.117e-05	1.787e-05	1.79e-05	1.077e-05	1.952e-05
8.83486e-06	1.41517e-05	4.663e-05	3.379e-05	5.787e-05	2.843e-05	1.826e-05	1.77e-05	1.239e-05	1.985e-05
8.86395e-06	1.41858e-05	4.858e-05	3.542e-05	5.69e-05	2.57e-05	2.06e-05	1.829e-05	1.435e-05	1.985e-05
8.89304e-06	1.42199e-05	5.216e-05	3.705e-05	5.397e-05	2.375e-05	2.158e-05	1.888e-05	1.695e-05	2.017e-05
8.92213e-06	1.4254e-05	5.574e-05	4.03e-05	5.182e-05	2.277e-05	2.236e-05	2.044e-05	2.086e-05	2.278e-05
8.95123e-06	1.4288e-05	5.965e-05	4.323e-05	5.084e-05	2.277e-05	2.353e-05	2.161e-05	2.249e-05	2.44e-05
8.98032e-06	1.43221e-05	6.356e-05	4.584e-05	4.947e-05	2.277e-05	2.295e-05	2.122e-05	2.314e-05	2.571e-05
9.00941e-06	1.43562e-05	6.714e-05	4.747e-05	5.026e-05	2.277e-05	2.314e-05	2.102e-05	2.346e-05	2.571e-05
9.0385e-06	1.43903e-05	7.072e-05	4.714e-05	5.143e-05	2.199e-05	2.431e-05	2.083e-05	2.249e-05	2.571e-05
9.06759e-06	1.44244e-05	7.267e-05	4.812e-05	5.182e-05	2.121e-05	2.568e-05	2.141e-05	2.184e-05	2.506e-05
9.09668e-06	1.44584e-05	7.365e-05	4.942e-05	5.123e-05	1.965e-05	2.959e-05	2.298e-05	2.053e-05	2.473e-05
9.12577e-06	1.44925e-05	7.3e-05	5.007e-05	5.045e-05	1.926e-05	3.349e-05	2.473e-05	1.923e-05	2.31e-05
9.15486e-06	1.45266e-05	7.17e-05	4.942e-05	5.006e-05	1.867e-05	3.486e-05	2.669e-05	1.63e-05	2.05e-05
9.18396e-06	1.45607e-05	6.974e-05	4.877e-05	5.026e-05	1.886e-05	3.584e-05	2.864e-05	1.435e-05	1.855e-05
9.21305e-06	1.45947e-05	6.844e-05	4.877e-05	5.045e-05	1.926e-05	3.564e-05	2.864e-05	1.207e-05	1.789e-05
9.24214e-06	1.46288e-05	6.681e-05	4.812e-05	5.006e-05	1.984e-05	3.349e-05	2.708e-05	1.109e-05	1.822e-05
9.27123e-06	1.46629e-05	6.453e-05	4.681e-05	5.084e-05	1.906e-05	3.212e-05	2.552e-05	1.109e-05	1.789e-05
9.30032e-06	1.4697e-05	6.258e-05	4.616e-05	4.947e-05	1.808e-05	3.056e-05	2.415e-05	1.012e-05	1.562e-05
9.32941e-06	1.47311e-05	6.226e-05	4.584e-05	4.772e-05	1.691e-05	2.939e-05	2.337e-05	8.814e-06	1.464e-05
9.3585e-06	1.47651e-05	6.16e-05	4.616e-05	4.655e-05	1.613e-05	2.998e-05	2.317e-05	7.512e-06	1.366e-05
9.38759e-06	1.47992e-05	6.03e-05	4.616e-05	4.655e-05	1.574e-05	2.998e-05	2.317e-05	7.187e-06	1.236e-05
9.41669e-06	1.48333e-05	5.998e-05	4.519e-05	4.674e-05	1.554e-05	2.92e-05	2.161e-05	6.861e-06	9.105e-06
9.44578e-06	1.48674e-05	5.867e-05	4.323e-05	4.733e-05	1.476e-05	2.959e-05	2.141e-05	7.838e-06	6.501e-06
9.47487e-06	1.49014e-05	5.835e-05	4.095e-05	4.752e-05	1.379e-05	2.959e-05	2.161e-05	6.536e-06	4.873e-06
9.50396e-06	1.49355e-05	5.705e-05	3.998e-05	4.772e-05	1.398e-05	2.978e-05	2.239e-05	5.233e-06	6.175e-06
9.53305e-06	1.49696e-05	5.607e-05	3.868e-05	4.83e-05	1.379e-05	3.017e-05	2.434e-05	6.21e-06	7.152e-06
9.56214e-06	1.50037e-05	5.574e-05	3.868e-05	4.733e-05	1.301e-05	3.095e-05	2.649e-05	5.233e-06	6.826e-06
9.59123e-06	1.50378e-05	5.574e-05	3.933e-05	4.752e-05	1.34e-05	3.173e-05	2.727e-05	4.257e-06	5.524e-06
9.62032e-06	1.50718e-05	5.509e-05	3.9e-05	4.889e-05	1.457e-05	3.291e-05	2.688e-05	1.327e-06	3.897e-06
9.64941e-06	1.51059e-05	5.444e-05	3.77e-05	4.987e-05	1.711e-05	3.447e-05	2.591e-05	-1.277e-06	1.618e-06
9.67851e-06	1.514e-05	5.347e-05	3.542e-05	5.162e-05	2.004e-05	3.603e-05	2.532e-05	-2.579e-06	1.293e-06
9.7076e-06	1.51741e-05	5.216e-05	3.282e-05	5.455e-05	2.199e-05	3.798e-05	2.493e-05	-2.579e-06	-9.539e-09
9.73669e-06	1.52081e-05	5.119e-05	3.021e-05	5.475e-05	2.16e-05	3.955e-05	2.454e-05	-3.881e-06	-9.539e-09
9.76578e-06	1.52422e-05	4.923e-05	2.891e-05	5.553e-05	2.062e-05	4.072e-05	2.571e-05	-6.16e-06	-2.614e-06
9.79487e-06	1.52763e-05	4.598e-05	2.696e-05	5.67e-05	1.984e-05	4.209e-05	2.688e-05	-8.764e-06	-3.59e-06
9.82396e-06	1.53104e-05	4.207e-05	2.5e-05	5.69e-05	1.906e-05	4.228e-05	2.727e-05	-1.202e-05	-4.567e-06
9.85305e-06	1.53445e-05	3.849e-05	2.24e-05	5.768e-05	1.828e-05	4.209e-05	2.766e-05	-1.365e-05	-4.241e-06
9.88214e-06	1.53785e-05	3.524e-05	2.045e-05	5.846e-05	1.886e-05	4.306e-05	2.884e-05	-1.365e-05	-4.241e-06
9.91124e-06	1.54126e-05	3.133e-05	1.915e-05	5.885e-05	1.926e-05	4.209e-05	3.001e-05	-1.234e-05	-3.59e-06
9.94033e-06	1.54467e-05	2.97e-05	1.752e-05	5.963e-05	1.886e-05	4.111e-05	3.059e-05	-1.072e-05	-2.614e-06
9.96942e-06	1.54808e-05	2.742e-05	1.589e-05	6.022e-05	1.789e-05	4.13e-05	3.118e-05	-1.169e-05	-3.59e-06
9.99851e-06	1.55148e-05	2.645e-05	1.394e-05	5.865e-05	1.769e-05	3.896e-05	3.138e-05	-1.137e-05	-6.52e-06
1.00276e-05	1.55489e-05	2.417e-05	1.263e-05	5.729e-05	1.847e-05	3.837e-05	3.157e-05	-1.202e-05	-1.043e-05
1.00567e-05	1.5583e-05	2.091e-05	1.068e-05	5.592e-05	1.984e-05	3.994e-05	3.118e-05	-1.234e-05	-1.401e-05
1.00858e-05	1.56171e-05	1.896e-05	8.403e-06	5.494e-05	2.082e-05	4.072e-05	3.098e-05	-1.332e-05	-1.694e-05
1.01149e-05	1.56512e-05	1.701e-05	7.101e-06	5.553e-05	2.218e-05	4.384e-05	3.157e-05	-1.3e-05	-1.954e-05
1.0144e-05	1.56852e-05	1.505e-05	7.101e-06	5.67e-05	2.375e-05	4.677e-05	3.333e-05	-1.234e-05	-2.117e-05
1.01731e-05	1.57193e-05	1.408e-05	7.426e-06	5.709e-05	2.414e-05	4.795e-05	3.489e-05	-1.3e-05	-2.345e-05
1.02021e-05	1.57534e-05	1.343e-05	8.077e-06	5.768e-05	2.433e-05	4.99e-05	3.723e-05	-1.332e-05	-2.507e-05
1.02312e-05	1.57875e-05	1.31e-05	8.728e-06	5.651e-05	2.316e-05	5.146e-05	3.88e-05	-1.625e-05	-2.768e-05
1.02603e-05	1.58215e-05	1.408e-05	1.036e-05	5.455e-05	2.238e-05	5.224e-05	3.997e-05	-1.918e-05	-3.126e-05
1.02894e-05	1.58556e-05	1.603e-05	1.198e-05	5.416e-05	2.238e-05	5.439e-05	4.134e-05	-2.374e-05	-3.386e-05
1.03185e-05	1.58897e-05	1.603e-05	1.329e-05	5.377e-05	2.258e-05	5.498e-05	4.212e-05	-2.732e-05	-3.354e-05
1.03476e-05	1.59238e-05	1.798e-05	1.231e-05	5.377e-05	2.179e-05	5.537e-05	4.251e-05	-2.96e-05	-3.191e-05
1.03767e-05	1.59579e-05	1.831e-05	1.101e-05	5.338e-05	2.14e-05	5.654e-05	4.114e-05	-2.992e-05	-2.931e-05
1.04058e-05	1.59919e-05	1.831e-05	1.036e-05	5.319e-05	2.043e-05	5.634e-05	4.036e-05	-3.025e-05	-2.8e-05
1.04349e-05	1.6026e-05	1.864e-05	8.728e-06	5.28e-05	1.945e-05	5.498e-05	3.919e-05	-2.862e-05	-2.67e-05
1.0464e-05	1.60601e-05	1.603e-05	8.077e-06	5.28e-05	1.847e-05	5.4e-05	3.919e-05	-2.699e-05	-2.638e-05
1.04931e-05	1.60942e-05	1.571e-05	9.054e-06	5.065e-05	1.789e-05	5.244e-05	3.802e-05	-2.602e-05	-2.638e-05
1.05222e-05	1.61282e-05	1.571e-05	9.379e-06	4.908e-05	1.75e-05	5.009e-05	3.684e-05	-2.309e-05	-2.507e-05
1.05512e-05	1.61623e-05	1.571e-05	1.068e-05	4.772e-05	1.691e-05	4.834e-05	3.645e-05	-2.048e-05	-2.214e-05
1.05803e-05	1.61964e-05	1.636e-05	1.166e-05	4.694e-05	1.613e-05	4.716e-05	3.587e-05	-1.853e-05	-1.824e-05
1.06094e-05	1.62305e-05	1.668e-05	1.263e-05	4.694e-05	1.633e-05	4.521e-05	3.372e-05	-1.658e-05	-1.629e-05
1.06385e-05	1.62645e-05	1.603e-05	1.263e-05	4.85e-05	1.554e-05	4.502e-05	3.216e-05	-1.202e-05	-1.401e-05
1.06676e-05	1.62986e-05	1.603e-05	1.394e-05	4.908e-05	1.437e-05	4.423e-05	3.001e-05	-9.089e-06	-1.173e-05
1.06967e-05	1.63327e-05	1.701e-05	1.491e-05	4.987e-05	1.242e-05	4.423e-05	2.903e-05	-6.485e-06	-1.173e-05
1.07258e-05	1.63668e-05	1.896e-05	1.622e-05	5.065e-05	1.086e-05	4.502e-05	2.962e-05	-4.858e-06	-1.205e-05
1.07549e-05	1.64009e-05	2.124e-05	1.752e-05	4.908e-05	8.904e-06	4.384e-05	3.079e-05	-2.905e-06	-1.14e-05
1.0784e-05	1.64349e-05	2.319e-05	1.947e-05	4.791e-05	8.708e-06	4.209e-05	3.079e-05	3.506e-07	-8.473e-06
1.08131e-05	1.6469e-05	2.515e-05	1.98e-05	4.694e-05	8.513e-06	4.189e-05	3.157e-05	3.606e-06	-5.543e-06
1.08422e-05	1.65031e-05	2.808e-05	1.947e-05	4.498e-05	8.904e-06	4.209e-05	3.098e-05	3.931e-06	-2.288e-06
1.08712e-05	1.65372e-05	3.101e-05	1.849e-05	4.342e-05	9.099e-06	4.13e-05	3.001e-05	3.28e-06	-9.861e-07
1.09003e-05	1.65712e-05	3.263e-05	1.882e-05	4.264e-05	1.047e-05	4.209e-05	3.079e-05	1.002e-06	-2.288e-06
1.09294e-05	1.66053e-05	3.459e-05	1.915e-05	4.166e-05	1.086e-05	4.111e-05	3.079e-05	-1.928e-06	-4.241e-06
1.09585e-05	1.66394e-05	3.491e-05	2.045e-05	4.147e-05	1.144e-05	4.072e-05	3.079e-05	-4.532e-06	-6.52e-06
1.09876e-05	1.66735e-05	3.426e-05	2.045e-05	4.205e-05	1.144e-05	4.111e-05	3.02e-05	-3.881e-06	-6.194e-06
1.10167e-05	1.67076e-05	3.263e-05	1.882e-05	4.166e-05	9.685e-06	3.955e-05	3.001e-05	-2.905e-06	-4.567e-06
1.10458e-05	1.67416e-05	3.101e-05	1.784e-05	4.244e-05	8.904e-06	3.916e-05	3.02e-05	-6.259e-07	-1.963e-06
1.10749e-05	1.67757e-05	3.035e-05	1.687e-05	4.342e-05	7.927e-06	4.091e-05	3.216e-05	1.327e-06	-3.351e-07
1.1104e-05	1.68098e-05	2.97e-05	1.784e-05	4.381e-05	6.951e-06	4.17e-05	3.333e-05	6.762e-07	-3.351e-07
1.11331e-05	1.68439e-05	2.873e-05	1.915e-05	4.459e-05	6.951e-06	4.267e-05	3.391e-05	1.002e-06	-9.861e-07
1.11622e-05	1.68779e-05	2.742e-05	2.045e-05	4.401e-05	6.951e-06	4.404e-05	3.391e-05	-6.259e-07	-2.288e-06
1.11913e-05	1.6912e-05	2.71e-05	2.175e-05	4.264e-05	7.341e-06	4.384e-05	3.333e-05	-6.259e-07	-2.939e-06
1.12203e-05	1.69461e-05	2.612e-05	2.207e-05	4.283e-05	8.122e-06	4.502e-05	3.274e-05	6.762e-07	-3.265e-06
1.12494e-05	1.69802e-05	2.612e-05	2.175e-05	4.186e-05	8.513e-06	4.716e-05	3.196e-05	4.582e-06	-1.637e-06
1.12785e-05	1.70143e-05	2.742e-05	2.207e-05	4.108e-05	8.904e-06	4.834e-05	3.196e-05	5.884e-06	1.944e-06
1.13076e-05	1.70483e-05	2.775e-05	2.175e-05	4.03e-05	9.294e-06	4.97e-05	3.294e-05	8.814e-06	4.222e-06
1.13367e-05	1.70824e-05	2.905e-05	2.077e-05	4.01e-05	1.008e-05	5.127e-05	3.372e-05	8.814e-06	3.897e-06
1.13658e-05	1.71165e-05	3.101e-05	2.207e-05	3.99e-05	9.685e-06	5.068e-05	3.45e-05	8.163e-06	1.944e-06
1.13949e-05	1.71506e-05	3.328e-05	2.273e-05	4.069e-05	1.008e-05	5.127e-05	3.645e-05	7.838e-06	-9.861e-07
1.1424e-05	1.71846e-05	3.328e-05	2.37e-05	4.088e-05	9.685e-06	5.146e-05	3.704e-05	4.582e-06	-4.241e-06
1.14531e-05	1.72187e-05	3.328e-05	2.338e-05	4.186e-05	1.066e-05	5.068e-05	3.743e-05	3.606e-06	-5.869e-06
1.14822e-05	1.72528e-05	3.166e-05	2.24e-05	4.342e-05	1.047e-05	5.341e-05	3.802e-05	2.629e-06	-6.194e-06
1.15113e-05	1.72869e-05	3.035e-05	2.142e-05	4.264e-05	1.008e-05	5.537e-05	3.86e-05	1.653e-06	-4.567e-06
1.15403e-05	1.7321e-05	2.97e-05	2.11e-05	4.127e-05	1.027e-05	5.634e-05	4.016e-05	-3.004e-07	-4.241e-06
1.15694e-05	1.7355e-05	2.905e-05	2.012e-05	4.049e-05	1.066e-05	5.732e-05	4.134e-05	-9.514e-07	-5.218e-06
1.15985e-05	1.73891e-05	2.742e-05	1.98e-05	3.99e-05	1.164e-05	5.654e-05	4.153e-05	-1.928e-06	-8.473e-06
1.16276e-05	1.74232e-05	2.547e-05	1.882e-05	4.01e-05	1.34e-05	5.498e-05	4.114e-05	-1.928e-06	-1.238e-05
1.16567e-05	1.74573e-05	2.287e-05	1.752e-05	4.088e-05	1.535e-05	5.537e-05	4.056e-05	-1.928e-06	-1.401e-05
1.16858e-05	1.74913e-05	1.994e-05	1.556e-05	4.01e-05	1.633e-05	5.517e-05	3.958e-05	-2.905e-06	-1.27e-05
1.17149e-05	1.75254e-05	1.766e-05	1.329e-05	4.01e-05	1.593e-05	5.537e-05	3.899e-05	-1.277e-06	-8.148e-06
1.1744e-05	1.75595e-05	1.473e-05	1.068e-05	3.971e-05	1.437e-05	5.615e-05	3.899e-05	-6.259e-07	-2.288e-06
1.17731e-05	1.75936e-05	1.213e-05	9.054e-06	4.01e-05	1.34e-05	5.654e-05	3.938e-05	1.327e-06	1.293e-06
1.18022e-05	1.76277e-05	1.18e-05	6.45e-06	4.108e-05	1.261e-05	5.595e-05	3.938e-05	3.606e-06	6.415e-07
1.18313e-05	1.76617e-05	1.017e-05	5.473e-06	4.186e-05	1.32e-05	5.712e-05	3.997e-05	5.884e-06	-1.637e-06
1.18603e-05	1.76958e-05	1.05e-05	4.822e-06	4.147e-05	1.398e-05	5.732e-05	3.977e-05	7.838e-06	-3.265e-06
1.18894e-05	1.77299e-05	1.017e-05	4.822e-06	4.205e-05	1.496e-05	5.752e-05	3.841e-05	9.14e-06	-3.265e-06
1.19185e-05	1.7764e-05	9.846e-06	2.218e-06	4.342e-05	1.613e-05	5.81e-05	3.587e-05	1.012e-05	-4.567e-06
1.19476e-05	1.7798e-05	1.05e-05	5.903e-07	4.401e-05	1.75e-05	5.654e-05	3.255e-05	1.044e-05	-5.218e-06
1.19767e-05	1.78321e-05	1.18e-05	2.648e-07	4.498e-05	1.808e-05	5.595e-05	3.059e-05	1.239e-05	-5.218e-06
1.20058e-05	1.78662e-05	1.213e-05	1.241e-06	4.596e-05	1.828e-05	5.595e-05	2.845e-05	1.305e-05	-5.543e-06
1.20349e-05	1.79003e-05	1.245e-05	1.892e-06	4.635e-05	1.867e-05	5.537e-05	2.845e-05	1.207e-05	-6.194e-06
1.2064e-05	1.79344e-05	1.213e-05	5.903e-07	4.694e-05	1.906e-05	5.38e-05	2.962e-05	1.142e-05	-6.52e-06
1.20931e-05	1.79684e-05	1.082e-05	-6.071e-08	4.85e-05	2.004e-05	5.341e-05	3.157e-05	1.142e-05	-6.845e-06
1.21222e-05	1.80025e-05	1.017e-05	2.648e-07	4.889e-05	2.082e-05	5.185e-05	3.118e-05	1.044e-05	-6.52e-06
1.21513e-05	1.80366e-05	8.87e-06	-3.862e-07	4.987e-05	2.199e-05	5.068e-05	3.118e-05	9.791e-06	-5.869e-06
1.21804e-05	1.80707e-05	7.242e-06	-1.363e-06	4.967e-05	2.277e-05	5.107e-05	3.079e-05	9.14e-06	-5.543e-06
1.22094e-05	1.81047e-05	6.917e-06	-2.99e-06	4.869e-05	2.297e-05	4.951e-05	2.981e-05	9.465e-06	-4.892e-06
1.22385e-05	1.81388e-05	4.313e-06	-5.595e-06	4.85e-05	2.297e-05	4.931e-05	2.962e-05	9.465e-06	-3.916e-06
1.22676e-05	1.81729e-05	2.685e-06	-6.897e-06	4.733e-05	2.199e-05	5.009e-05	3.118e-05	9.791e-06	-2.288e-06
1.22967e-05	1.8207e-05	7.318e-07	-7.548e-06	4.674e-05	2.14e-05	4.97e-05	3.274e-05	1.012e-05	-9.541e-09
1.23258e-05	1.82411e-05	-2.198e-06	-8.199e-06	4.615e-05	2.121e-05	4.951e-05	3.352e-05	1.142e-05	2.595e-06
1.23549e-05	1.82751e-05	-5.453e-06	-8.199e-06	4.459e-05	2.082e-05	4.853e-05	3.372e-05	1.337e-05	3.571e-06
1.2384e-05	1.83092e-05	-7.406e-06	-9.175e-06	4.362e-05	2.062e-05	4.638e-05	3.313e-05	1.532e-05	3.246e-06
1.24131e-05	1.83433e-05	-9.034e-06	-9.501e-06	4.381e-05	2.121e-05	4.658e-05	3.274e-05	1.532e-05	1.293e-06
1.24422e-05	1.83774e-05	-1.001e-05	-9.501e-06	4.322e-05	2.062e-05	4.716e-05	3.313e-05	1.532e-05	-3.351e-07
1.24713e-05	1.84114e-05	-9.359e-06	-8.85e-06	4.322e-05	1.965e-05	4.697e-05	3.372e-05	1.402e-05	-1.312e-06
1.25004e-05	1.84455e-05	-9.359e-06	-8.524e-06	4.401e-05	1.847e-05	4.834e-05	3.431e-05	1.402e-05	-1.963e-06
1.25294e-05	1.84796e-05	-7.406e-06	-8.524e-06	4.537e-05	1.886e-05	4.834e-05	3.431e-05	1.402e-05	-1.312e-06
1.25585e-05	1.85137e-05	-4.802e-06	-7.873e-06	4.596e-05	1.867e-05	4.814e-05	3.431e-05	1.305e-05	-6.606e-07
1.25876e-05	1.85478e-05	-3.5e-06	-8.524e-06	4.615e-05	2.004e-05	5.068e-05	3.45e-05	1.174e-05	-1.637e-06
1.26167e-05	1.85818e-05	-3.174e-06	-9.501e-06	4.537e-05	2.062e-05	5.283e-05	3.47e-05	1.012e-05	-3.265e-06
1.26458e-05	1.86159e-05	-3.5e-06	-1.048e-05	4.459e-05	2.082e-05	5.302e-05	3.489e-05	9.465e-06	-5.869e-06
1.26749e-05	1.865e-05	-4.477e-06	-1.048e-05	4.459e-05	2.16e-05	5.4e-05	3.489e-05	8.814e-06	-7.822e-06
1.2704e-05	1.86841e-05	-5.779e-06	-8.85e-06	4.381e-05	2.179e-05	5.478e-05	3.509e-05	8.489e-06	-8.473e-06
1.27331e-05	1.87181e-05	-8.708e-06	-7.222e-06	4.479e-05	2.14e-05	5.478e-05	3.45e-05	6.536e-06	-8.148e-06
1.27622e-05	1.87522e-05	-1.066e-05	-7.222e-06	4.596e-05	2.004e-05	5.595e-05	3.431e-05	5.233e-06	-7.822e-06
1.27913e-05	1.87863e-05	-1.294e-05	-7.873e-06	4.479e-05	1.906e-05	5.498e-05	3.411e-05	1.978e-06	-8.799e-06
1.28204e-05	1.88204e-05	-1.457e-05	-1.015e-05	4.362e-05	1.828e-05	5.459e-05	3.352e-05	-1.277e-06	-1.043e-05
1.28495e-05	1.88545e-05	-1.522e-05	-1.276e-05	4.225e-05	1.789e-05	5.498e-05	3.411e-05	-3.556e-06	-1.27e-05
1.28785e-05	1.88885e-05	-1.62e-05	-1.503e-05	4.108e-05	1.691e-05	5.283e-05	3.45e-05	-6.16e-06	-1.466e-05
1.29076e-05	1.89226e-05	-1.717e-05	-1.666e-05	4.03e-05	1.535e-05	5.205e-05	3.509e-05	-5.834e-06	-1.401e-05
1.29367e-05	1.89567e-05	-1.912e-05	-1.829e-05	4.147e-05	1.32e-05	5.283e-05	3.587e-05	-6.811e-06	-1.401e-05
1.29658e-05	1.89908e-05	-2.14e-05	-1.992e-05	4.205e-05	1.281e-05	5.263e-05	3.606e-05	-8.113e-06	-1.303e-05
1.29949e-05	1.90248e-05	-2.238e-05	-1.959e-05	4.264e-05	1.301e-05	5.166e-05	3.665e-05	-1.007e-05	-1.205e-05
1.3024e-05	1.90589e-05	-2.271e-05	-2.024e-05	4.127e-05	1.379e-05	5.166e-05	3.684e-05	-9.741e-06	-1.075e-05
1.30531e-05	1.9093e-05	-2.205e-05	-2.089e-05	4.01e-05	1.34e-05	5.127e-05	3.723e-05	-9.415e-06	-1.108e-05
1.30822e-05	1.91271e-05	-2.108e-05	-2.122e-05	3.873e-05	1.301e-05	5.322e-05	3.782e-05	-6.485e-06	-1.238e-05
1.31113e-05	1.91611e-05	-2.043e-05	-2.122e-05	3.834e-05	1.222e-05	5.615e-05	3.86e-05	-5.183e-06	-1.498e-05
1.31404e-05	1.91952e-05	-1.978e-05	-2.285e-05	3.737e-05	9.88e-06	5.673e-05	3.88e-05	-4.207e-06	-1.856e-05
1.31695e-05	1.92293e-05	-1.782e-05	-2.382e-05	3.737e-05	6.951e-06	5.654e-05	3.977e-05	-3.881e-06	-2.117e-05
1.31985e-05	1.92634e-05	-1.685e-05	-2.317e-05	3.737e-05	4.607e-06	5.693e-05	4.095e-05	-5.509e-06	-2.377e-05
1.32276e-05	1.92975e-05	-1.62e-05	-2.252e-05	3.619e-05	4.021e-06	5.654e-05	4.095e-05	-8.764e-06	-2.67e-05
1.32567e-05	1.93315e-05	-1.457e-05	-2.285e-05	3.522e-05	4.021e-06	5.673e-05	4.056e-05	-1.072e-05	-2.703e-05
1.32858e-05	1.93656e-05	-1.392e-05	-2.382e-05	3.405e-05	5.388e-06	5.791e-05	4.134e-05	-1.169e-05	-2.768e-05
1.33149e-05	1.93997e-05	-1.294e-05	-2.447e-05	3.209e-05	6.56e-06	5.752e-05	4.075e-05	-1.43e-05	-2.768e-05
1.3344e-05	1.94338e-05	-1.327e-05	-2.447e-05	3.112e-05	5.193e-06	5.673e-05	4.056e-05	-1.527e-05	-2.54e-05
1.33731e-05	1.94678e-05	-1.489e-05	-2.48e-05	3.131e-05	2.654e-06	5.615e-05	4.075e-05	-1.527e-05	-2.312e-05
1.34022e-05	1.95019e-05	-1.685e-05	-2.61e-05	3.209e-05	5.053e-07	5.517e-05	4.056e-05	-1.56e-05	-2.247e-05
1.34313e-05	1.9536e-05	-1.88e-05	-2.643e-05	3.248e-05	-8.068e-08	5.38e-05	4.114e-05	-1.365e-05	-2.019e-05
1.34604e-05	1.95701e-05	-2.075e-05	-2.708e-05	3.17e-05	1.146e-07	5.263e-05	4.173e-05	-1.169e-05	-1.694e-05
1.34895e-05	1.96042e-05	-2.238e-05	-2.708e-05	3.014e-05	1.091e-06	5.029e-05	4.134e-05	-9.089e-06	-1.563e-05
1.35186e-05	1.96382e-05	-2.433e-05	-2.838e-05	2.897e-05	2.458e-06	4.99e-05	4.075e-05	-5.509e-06	-1.498e-05
1.35476e-05	1.96723e-05	-2.433e-05	-2.903e-05	2.76e-05	2.849e-06	4.951e-05	3.958e-05	-1.277e-06	-1.368e-05
1.35767e-05	1.97064e-05	-2.433e-05	-2.838e-05	2.721e-05	2.654e-06	4.775e-05	3.821e-05	2.304e-06	-1.238e-05
1.36058e-05	1.97405e-05	-2.433e-05	-2.643e-05	2.877e-05	2.654e-06	4.716e-05	3.763e-05	6.21e-06	-1.173e-05
1.36349e-05	1.97745e-05	-2.336e-05	-2.675e-05	2.994e-05	2.263e-06	4.58e-05	3.723e-05	9.14e-06	-1.173e-05
1.3664e-05	1.98086e-05	-2.01e-05	-2.61e-05	2.994e-05	2.263e-06	4.326e-05	3.509e-05	1.109e-05	-1.01e-05
1.36931e-05	1.98427e-05	-1.75e-05	-2.317e-05	3.17e-05	3.24e-06	4.189e-05	3.391e-05	1.207e-05	-8.148e-06
1.37222e-05	1.98768e-05	-1.489e-05	-2.024e-05	3.17e-05	4.997e-06	4.033e-05	3.157e-05	1.077e-05	-6.845e-06
1.37513e-05	1.99109e-05	-1.131e-05	-1.764e-05	3.19e-05	5.974e-06	3.916e-05	2.981e-05	1.044e-05	-6.194e-06
1.37804e-05	1.99449e-05	-8.057e-06	-1.569e-05	3.209e-05	6.365e-06	3.935e-05	2.903e-05	1.077e-05	-6.194e-06
1.38095e-05	1.9979e-05	-5.128e-06	-1.471e-05	3.424e-05	5.388e-06	3.877e-05	2.806e-05	9.465e-06	-5.869e-06
1.38386e-05	2.00131e-05	-3.174e-06	-1.308e-05	3.561e-05	3.24e-06	3.779e-05	2.806e-05	9.465e-06	-5.869e-06
1.38676e-05	2.00472e-05	-1.547e-06	-1.243e-05	3.795e-05	3.63e-06	3.896e-05	2.884e-05	8.814e-06	-4.567e-06
1.38967e-05	2.00812e-05	8.074e-08	-1.048e-05	3.854e-05	4.802e-06	3.798e-05	2.884e-05	1.044e-05	-4.567e-06
1.39258e-05	2.01153e-05	7.318e-07	-8.524e-06	3.815e-05	5.388e-06	3.662e-05	2.786e-05	1.142e-05	-3.265e-06
1.39549e-05	2.01494e-05	7.318e-07	-7.873e-06	3.717e-05	5.974e-06	3.623e-05	2.63e-05	1.337e-05	-1.963e-06
1.3984e-05	2.01835e-05	-5.703e-07	-6.571e-06	3.502e-05	5.583e-06	3.466e-05	2.513e-05	1.37e-05	-6.606e-07
1.40131e-05	2.02176e-05	-3.174e-06	-7.873e-06	3.248e-05	3.435e-06	3.369e-05	2.356e-05	1.467e-05	-3.351e-07
1.40422e-05	2.02516e-05	-4.477e-06	-8.85e-06	3.131e-05	1.287e-06	3.349e-05	2.298e-05	1.565e-05	-9.861e-07
1.40713e-05	2.02857e-05	-4.802e-06	-8.524e-06	2.955e-05	-8.619e-07	3.291e-05	2.161e-05	1.63e-05	-2.614e-06
1.41004e-05	2.03198e-05	-3.174e-06	-6.571e-06	2.78e-05	-2.424e-06	3.212e-05	2.141e-05	1.858e-05	-3.265e-06
1.41295e-05	2.03539e-05	-2.523e-06	-6.246e-06	2.545e-05	-2.815e-06	3.232e-05	2.181e-05	2.021e-05	-3.59e-06
1.41586e-05	2.03879e-05	-3.5e-06	-4.292e-06	2.252e-05	-2.229e-06	3.115e-05	2.063e-05	2.151e-05	-3.265e-06
1.41876e-05	2.0422e-05	-2.849e-06	-2.339e-06	2.037e-05	-2.424e-06	3.154e-05	1.966e-05	2.249e-05	-1.963e-06
1.42167e-05	2.04561e-05	-2.849e-06	-2.014e-06	1.881e-05	-2.62e-06	3.173e-05	1.888e-05	2.411e-05	-9.541e-09
1.42458e-05	2.04902e-05	-2.448e-07	-1.363e-06	1.842e-05	-3.987e-06	3.056e-05	1.751e-05	2.509e-05	1.944e-06
1.42749e-05	2.05243e-05	2.685e-06	-7.118e-07	1.901e-05	-6.526e-06	2.9e-05	1.634e-05	2.672e-05	2.269e-06
1.4304e-05	2.05583e-05	4.638e-06	1.241e-06	1.979e-05	-8.87e-06	2.763e-05	1.614e-05	2.672e-05	9.67e-07
1.43331e-05	2.05924e-05	5.94e-06	1.892e-06	1.842e-05	-1.082e-05	2.509e-05	1.614e-05	2.639e-05	3.16e-07
1.43622e-05	2.06265e-05	7.893e-06	2.543e-06	1.862e-05	-1.063e-05	2.334e-05	1.731e-05	2.607e-05	3.16e-07
1.43913e-05	2.06606e-05	9.195e-06	3.846e-06	1.881e-05	-9.651e-06	2.314e-05	1.79e-05	2.411e-05	1.293e-06
1.44204e-05	2.06946e-05	9.521e-06	4.497e-06	1.842e-05	-8.87e-06	2.216e-05	1.731e-05	2.249e-05	1.944e-06
1.44495e-05	2.07287e-05	9.846e-06	3.194e-06	1.822e-05	-8.87e-06	2.216e-05	1.595e-05	2.281e-05	3.246e-06
1.44786e-05	2.07628e-05	9.195e-06	2.543e-06	1.822e-05	-1.024e-05	2.197e-05	1.341e-05	2.249e-05	3.571e-06
1.45077e-05	2.07969e-05	9.846e-06	3.194e-06	1.92e-05	-1.199e-05	2.119e-05	1.087e-05	2.151e-05	4.222e-06
1.45367e-05	2.0831e-05	8.87e-06	2.543e-06	2.135e-05	-1.258e-05	2.197e-05	9.696e-06	2.216e-05	3.897e-06
1.45658e-05	2.0865e-05	6.917e-06	1.567e-06	2.252e-05	-1.375e-05	2.158e-05	9.696e-06	2.184e-05	2.92e-06
1.45949e-05	2.08991e-05	3.987e-06	-6.072e-08	2.233e-05	-1.395e-05	1.962e-05	1.028e-05	2.118e-05	6.415e-07
1.4624e-05	2.09332e-05	4.063e-07	-1.363e-06	2.194e-05	-1.317e-05	2.06e-05	1.067e-05	2.053e-05	-9.544e-09

## Sheet: figure5D
	RPE injection	RPE injection	RPE injection	medium injection	medium injection	medium injection
0.0002	33.2	15.18	39.1	5.76	5.57	10.1
0.0063	80.4	119	104	29.3	65.8	53.4
0.2	166	168	241	71.7	97.1	113
2	151	166	219	60.7	45.7	127
6.3	225	227	236	126	118	94.9

## Sheet: figure5G
	RPE-injection	RPE-injection	RPE-injection	non-injection	non-injection	non-injection
All retina layers	179.048	189.524	190.476	136.19	140.952	145.714
ONL	33.6579	29.0322	35.514	14.0498	11.2149	11.2149

## Sheet: figure5H
	total length			RPE injection
length	7438.11	7563.65	7113.11	1274.97	1666.32	1237.18
