# Supplementary material for: Human Amniotic Epithelial Stem Cell-Derived Retinal Pigment Epithelium Cells Repair Retinal Degeneration
Source: Frontiers journal article supplement (doi:10.3389/fcell.2021.737242), 2021-09-28
Supplement: Data_Sheet_2.ZIP [file Data_Sheet_2.ZIP]

|                                     | Sample Name                     | Subset Name | Count |
|-------------------------------------|---------------------------------|-------------|-------|
| <span style="color: cyan;">□</span> | lijinying 20170920 00015602.LMD | Lymphocytes |       |
| <span style="color: red;">□</span>  | lijinying 20170920 00015603.LMD | Lymphocytes |       |

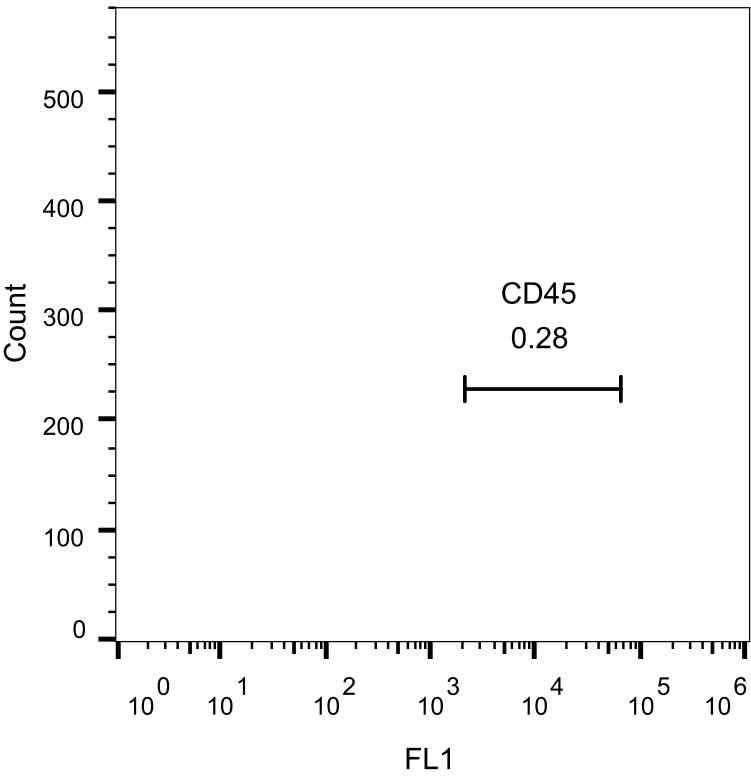

|  | Sample Name                                           | Subset Name | Cour |
|--|-------------------------------------------------------|-------------|------|
|  | <div><div></div>lijinying 20170920 00015614.LMD</div> | Lymphocytes |      |
|  | <div><div></div>lijinying 20170920 00015615.LMD</div> | Lymphocytes |      |

8970

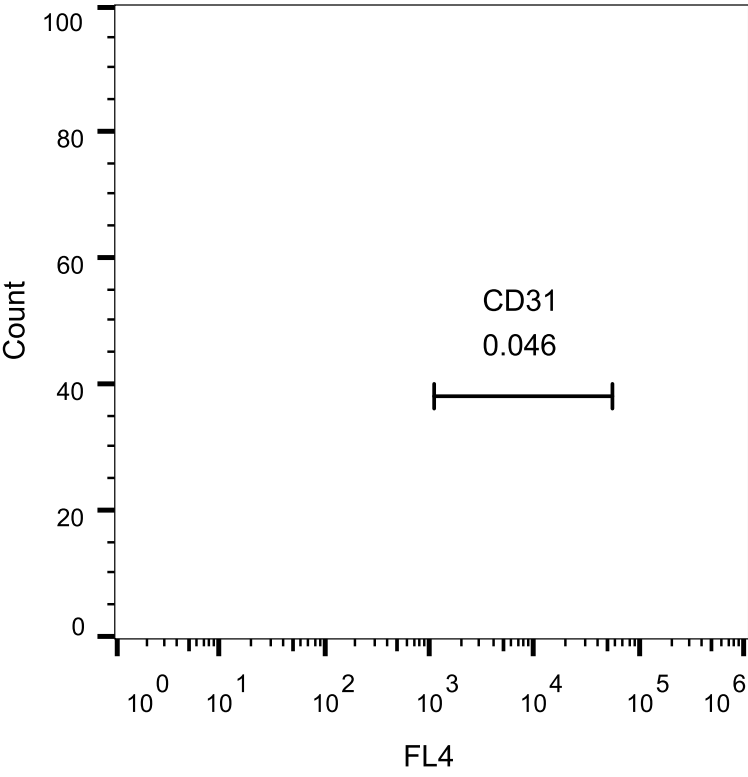

| Count |
|-------|
| 8660  |
| 8734  |

|                        | Sample Name                     | Subset Name |  |
|------------------------|---------------------------------|-------------|--|
| <div><div></div></div> | lijinying 20170920 00015602.LMD | Lymphocytes |  |
| <div><div></div></div> | lijinying 20170920 00015604.LMD | Lymphocytes |  |

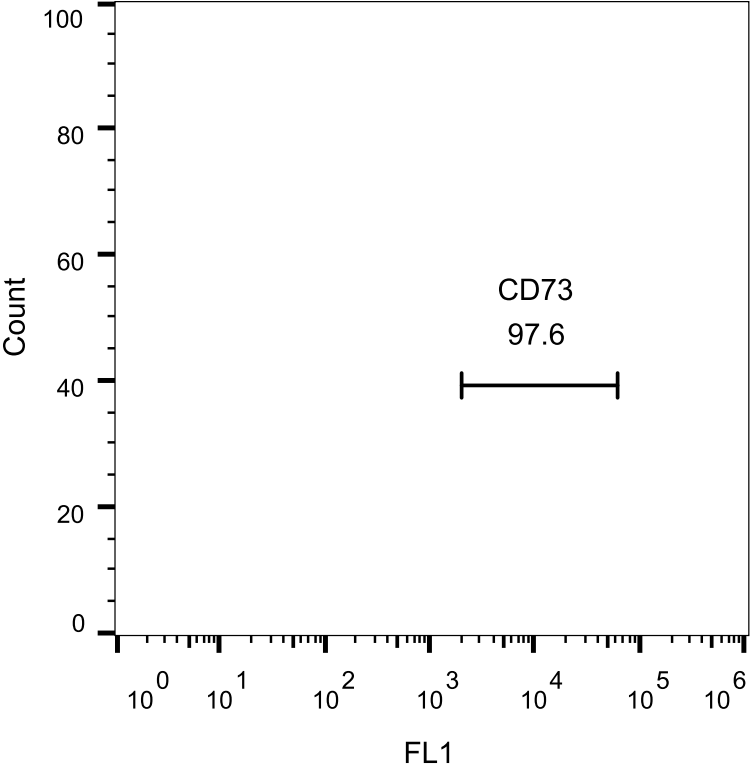

| Count |                                  |             |
|-------|----------------------------------|-------------|
|       | Sample Name                      | Subset Name |
|       | yuanweixin 20150519 00045050.LMD | Lymphocytes |
|       | yuanweixin 20150519 00045052.LMD | Lymphocytes |

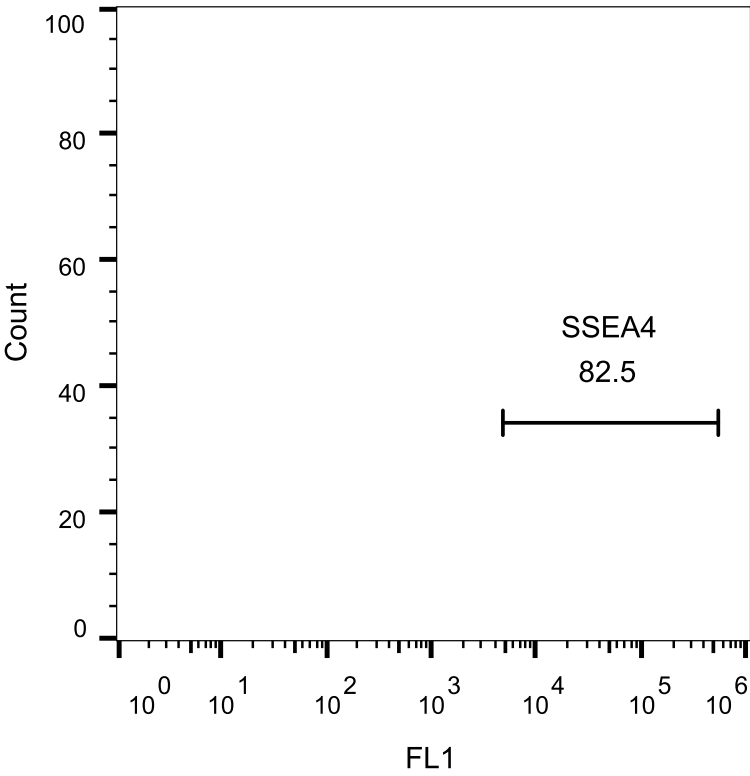

|  | Count |
|--|-------|
|  | 7309  |
|  | 6654  |

| Sample Name                 | Subset Name | Count |
|-----------------------------|-------------|-------|
| nying 20170920 00015611.LMD | Lymphocytes | 89    |
| nying 20170920 00015612.LMD | Lymphocytes | 91    |

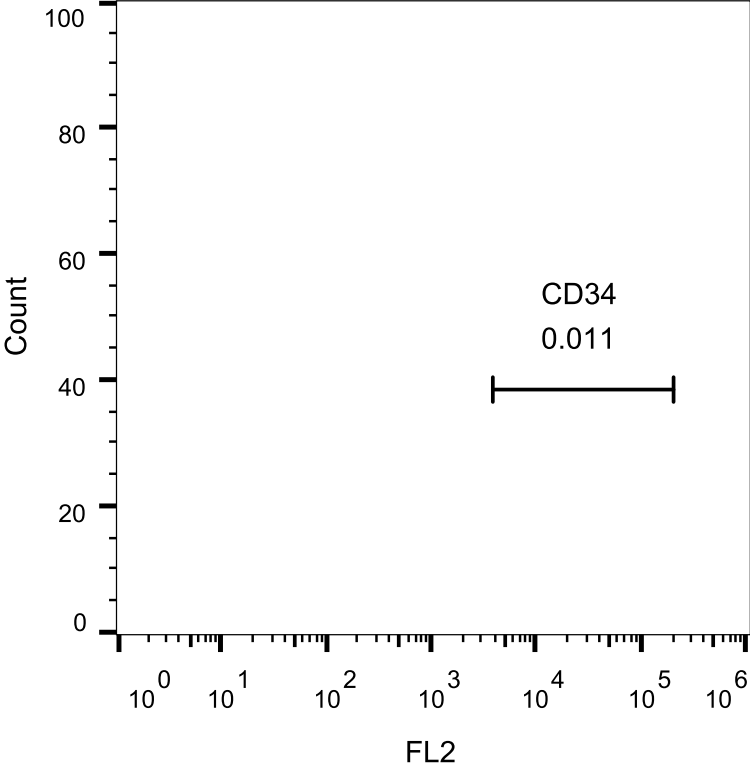

|    |
|----|
|    |
| 94 |
| 89 |
