# Supplementary material for: Human Amniotic Epithelial Stem Cell-Derived Retinal Pigment Epithelium Cells Repair Retinal Degeneration
Source: Frontiers journal article supplement (doi:10.3389/fcell.2021.737242), 2021-09-28
Supplement: Data_Sheet_2.ZIP [file Data_Sheet_2.ZIP]

|                        | Sample Name                  | Subset Name | Cou |
|------------------------|------------------------------|-------------|-----|
| <div><div></div></div> | A06 SHYAH0098C0 IgG1 PE .fcs | Lymphocytes |     |
| <div><div></div></div> | A07 SHYAH0098C0 CD90.fcs     | Lymphocytes |     |

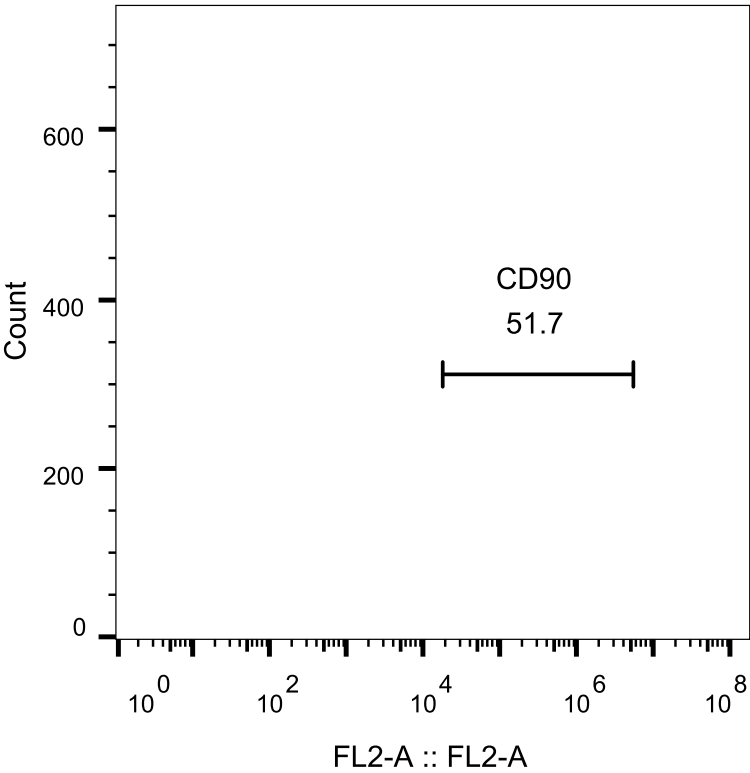

| int   |
|-------|
| 14824 |
| 14869 |

|                        | Sample Name                  | Subset Name |  |
|------------------------|------------------------------|-------------|--|
| <div><div></div></div> | A06 SHYAH0098C0 IgG1 PE .fcs | Lymphocytes |  |
| <div><div></div></div> | A08 SHYAH0098C0 CD105.fcs    | Lymphocytes |  |

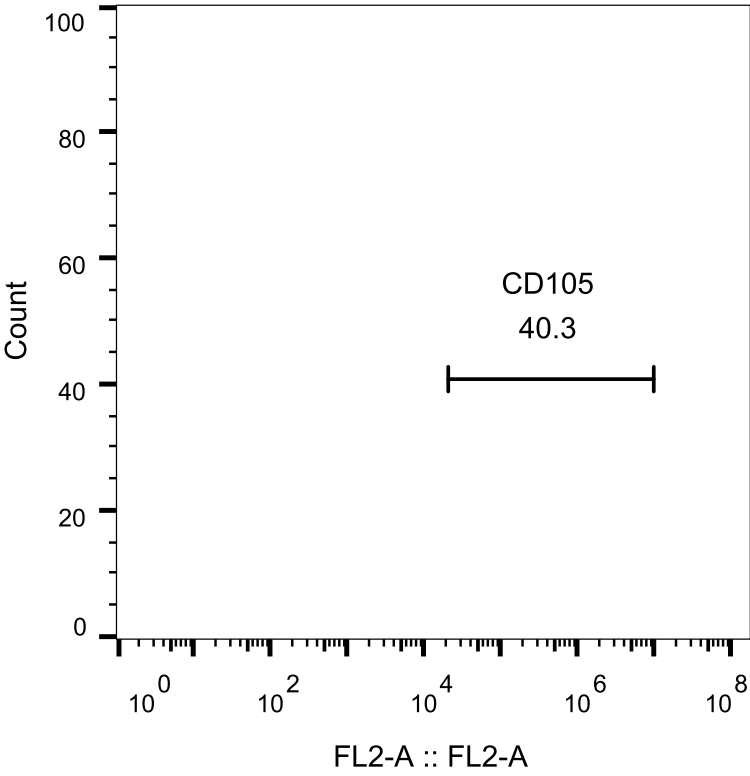

| Count |
|-------|
| 14824 |
| 13922 |
