# Supplementary material for: Human Amniotic Epithelial Stem Cell-Derived Retinal Pigment Epithelium Cells Repair Retinal Degeneration
Source: Frontiers journal article supplement (doi:10.3389/fcell.2021.737242), 2021-09-28
Supplement: Data_Sheet_2.ZIP [file Data_Sheet_2.ZIP]

## Sheet: figure2A
	hfRPE			500nM			1uM			2uM			4uM
MITF	1	1	1	0.174342	0.150276	0.137234	0.186856	0.281265	0.237613	0.196146	0.295248	0.252143	1.50525	0.913832	0.807094
PMEL	1	1	1	16.6794	10.7779	23.4562	66.7178	59.3016	95.0095	159.786	46.8507	77.1717	58.4852	37.8899	44.0075
OTX-2	1	1	1	0.169312	0.1471	0.2	0.185312	0.1681	0.22	0.179812	0.2581	0.233157	0.274571	0.481265	0.35

## Sheet: figure2B
	control	control	control	NIC	NIC	NIC	TSA(0.5μM)	TSA(0.5μM)	TSA(0.5μM)	TSA(1μM)	TSA(1μM)	TSA(1μM)	TSA(2μM)	TSA(2μM)	TSA(2μM)	TSA(3μM)	TSA(3μM)	TSA(3μM)	TSA(4μM)	TSA(4μM)	TSA(4μM)	NIC TSA(0.5μM)	NIC TSA(0.5μM)	NIC TSA(0.5μM)	NIC TSA(1μM)	NIC TSA(1μM)	NIC TSA(1μM)	NIC TSA(2μM)	NIC TSA(2μM)	NIC TSA(2μM)	NIC TSA(3μM)	NIC TSA(3μM)	NIC TSA(3μM)	NIC TSA(4μM)	NIC TSA(4μM)	NIC TSA(4μM)
dead cells(%)	2.46	3.65	3.94	2.39	3.75	4.75	7.58	12.3	14.15	9.28	14.95	17.26	18.7	32.47	36.51	27.15	32.67	39.12	39.3	35.15	55.62	3.62	4.53	5.02	4.56	6.98	6.66	11.86	19.6	18.69	20.28	20.5	16.71	25.51	21.29	24.74

## Sheet: figure2C
	hfRPE			NIC			TSA			NIC+TSA
MITF	1	1	1	0.036906	0.058631	0.0687213	0.186856	0.188156	0.2552	0.2	0.170755	0.317813
PMEL	1	1	1	11.7127	3.07375	8.13452	66.7178	116.97	77.1717	116.97	75.5835	73.5167
OTX2	1	1	1	0.034321	0.058631	0.0687213	0.185312	0.1681	0.22	0.312351	0.27	0.394123
