# Supplementary figures and images for: Human Amniotic Epithelial Stem Cell-Derived Retinal Pigment Epithelium Cells Repair Retinal Degeneration
Source: Frontiers journal article supplement (doi:10.3389/fcell.2021.737242), 2021-09-28

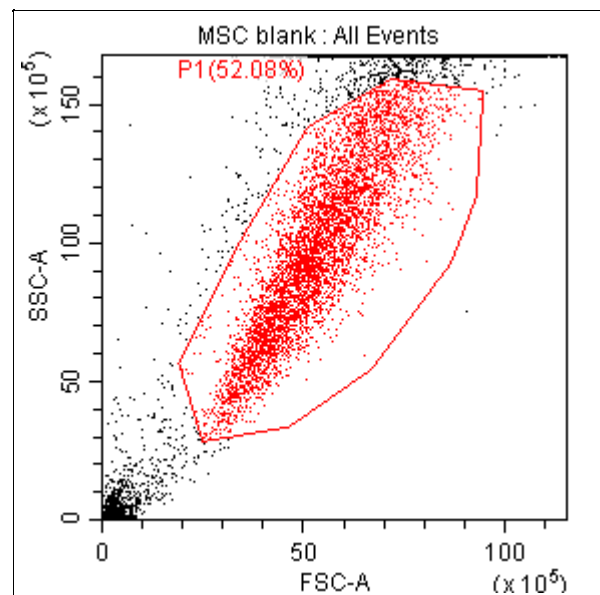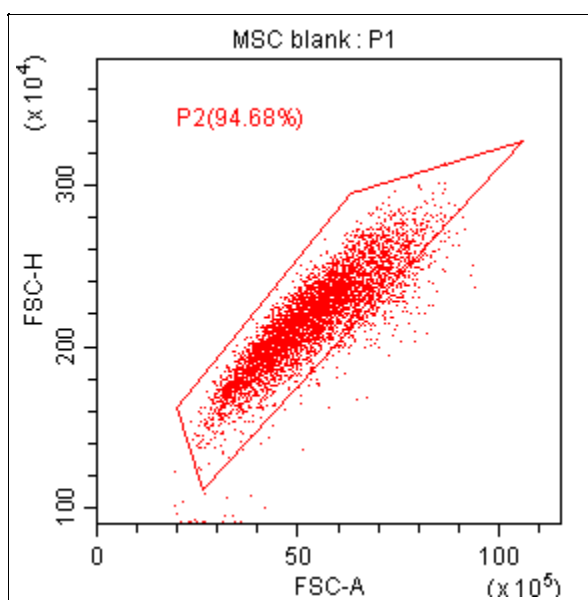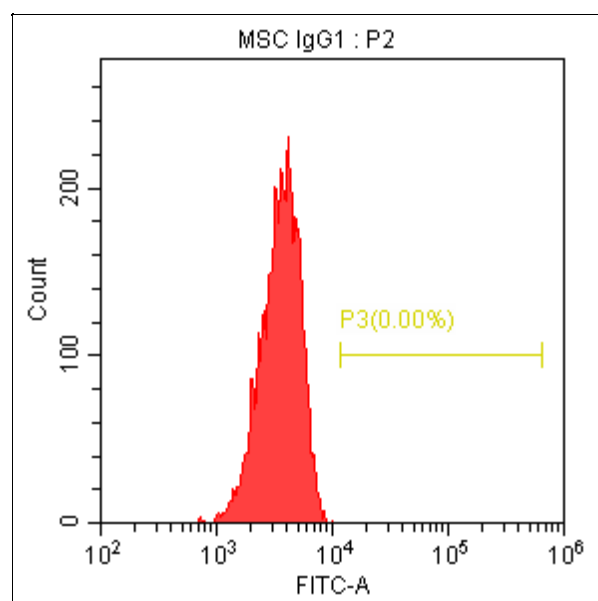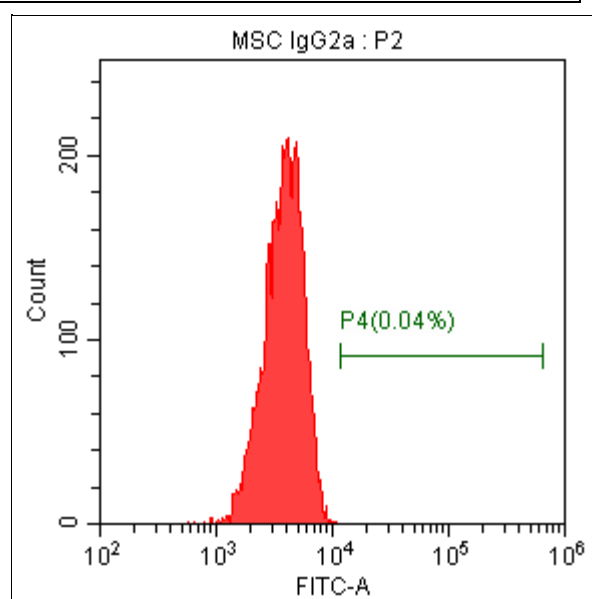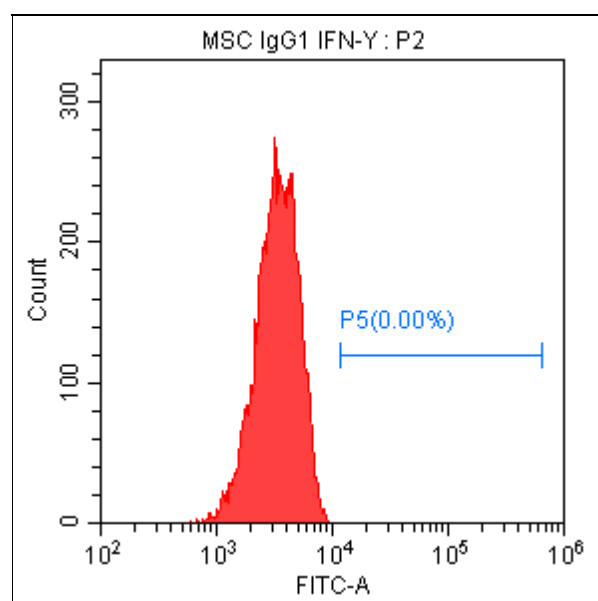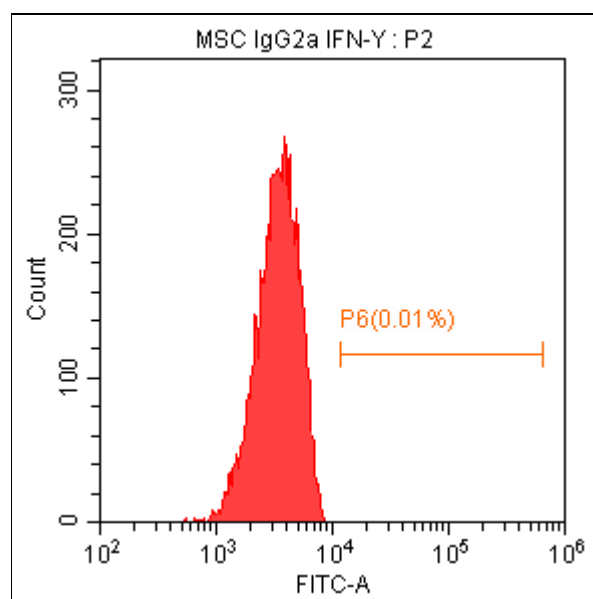

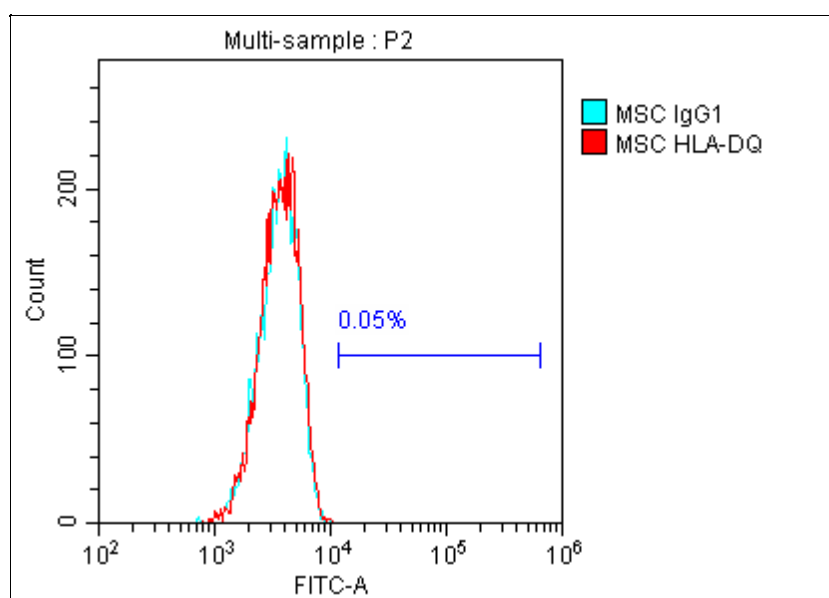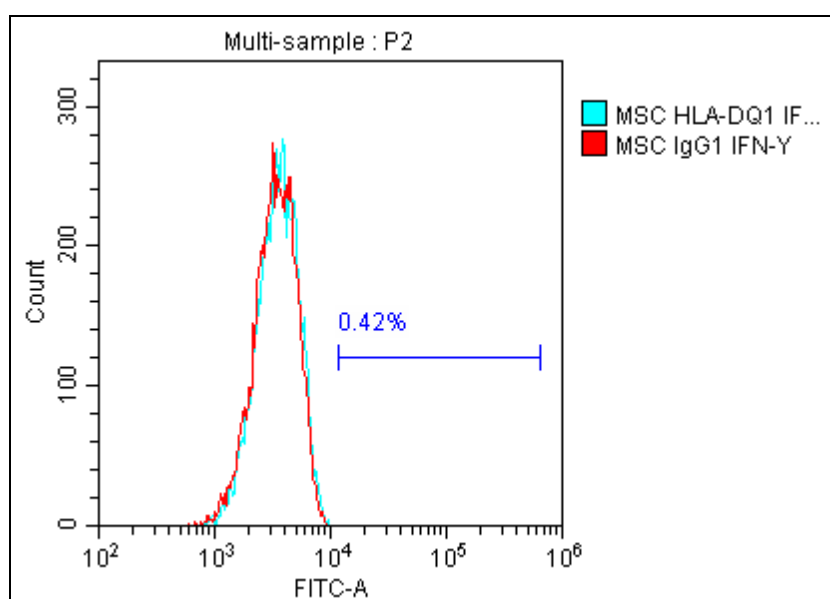

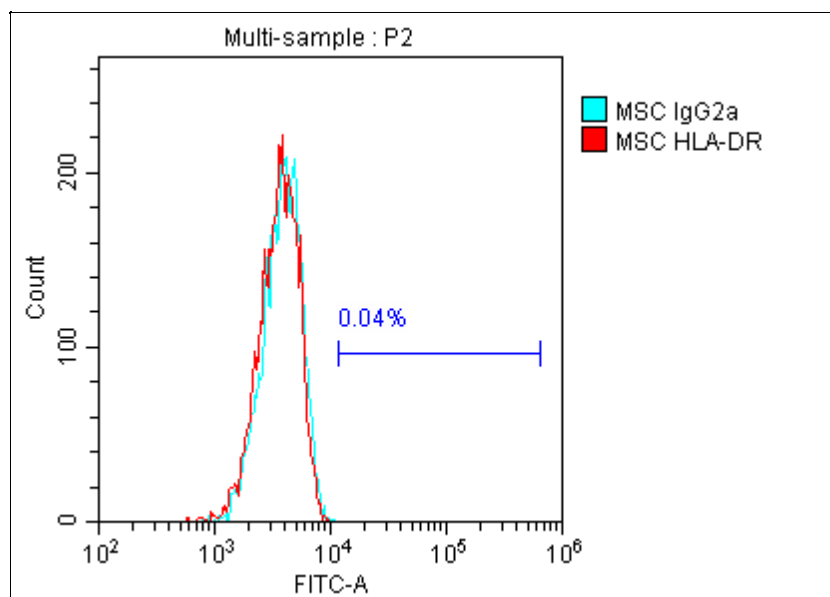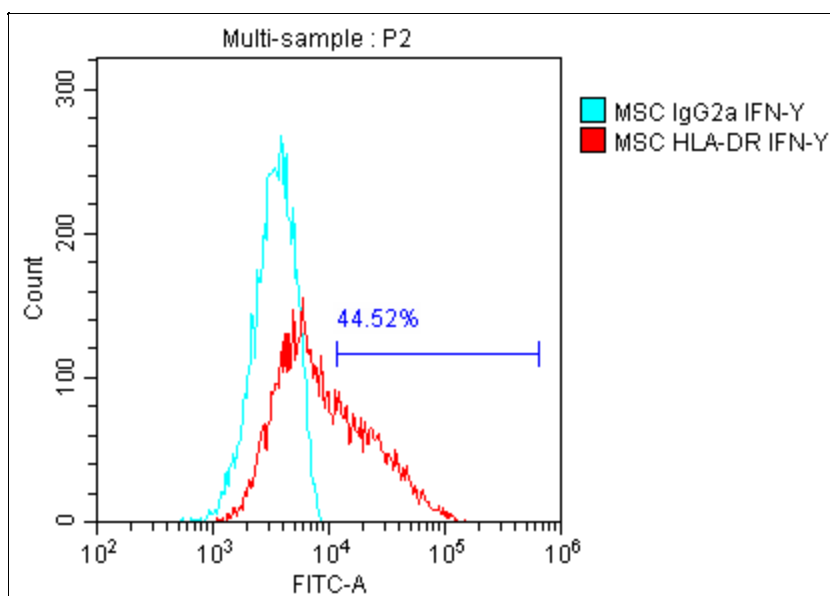

Supplement: Data_Sheet_2.ZIP [file Data_Sheet_2.ZIP]

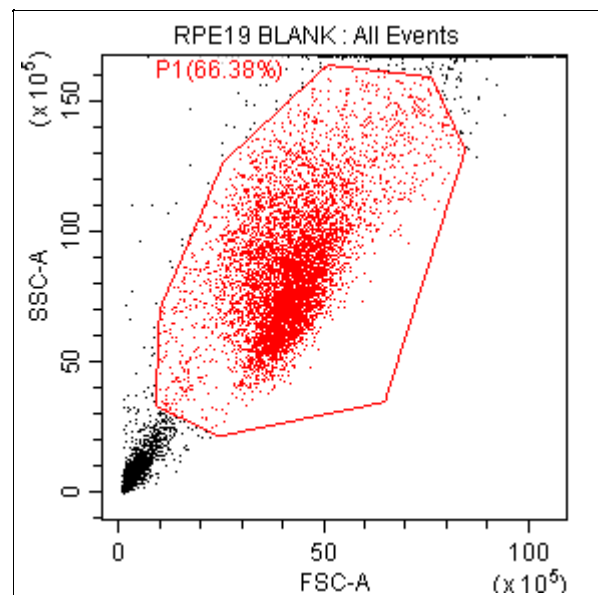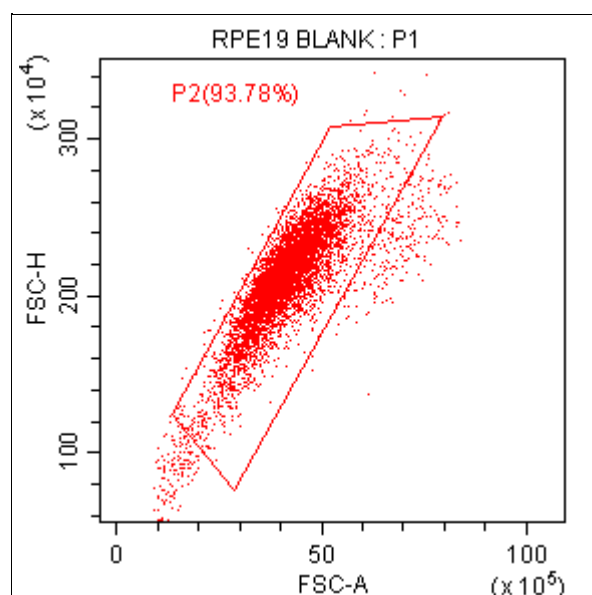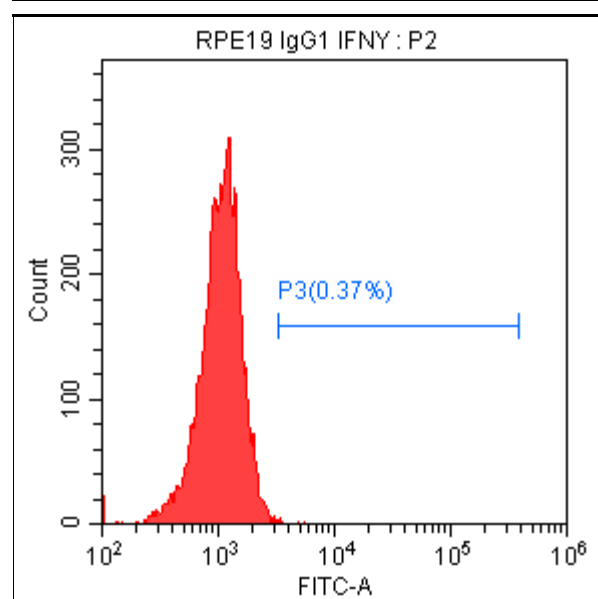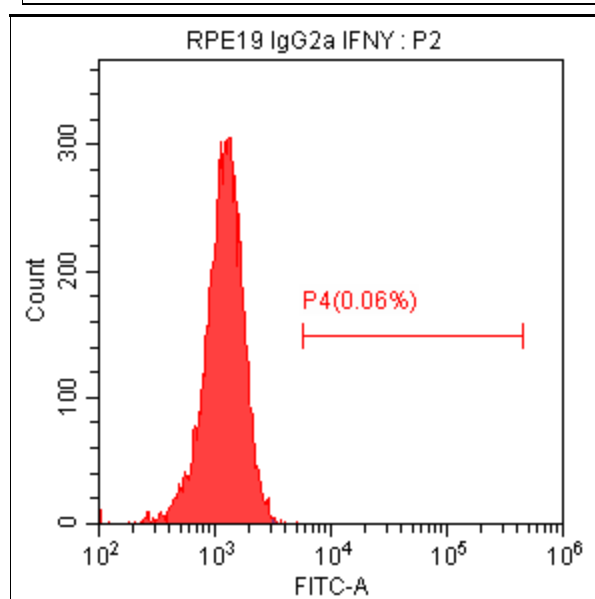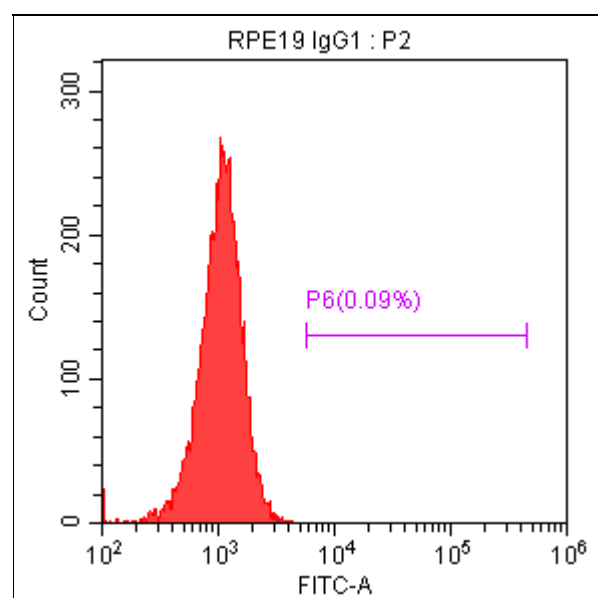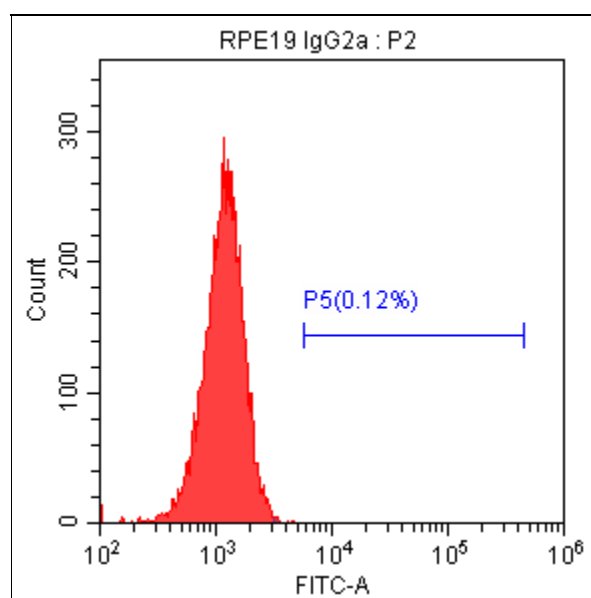

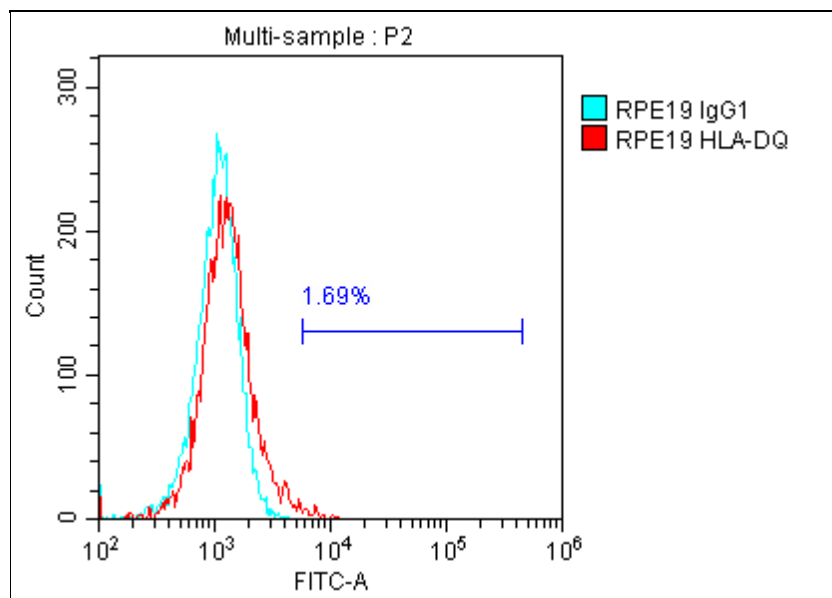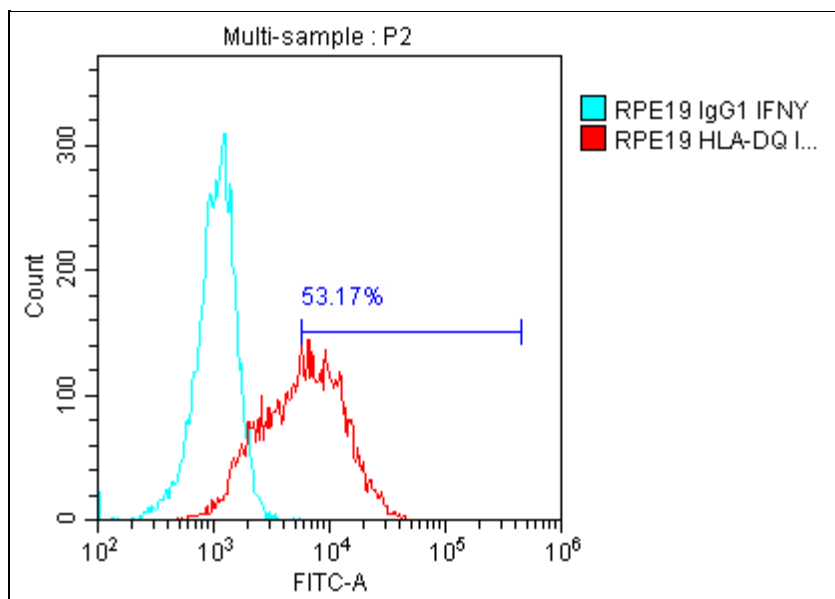

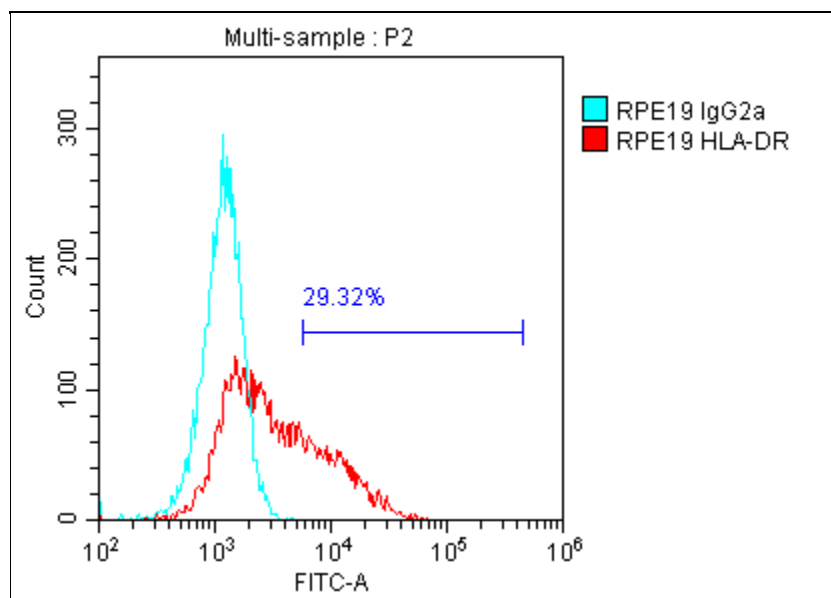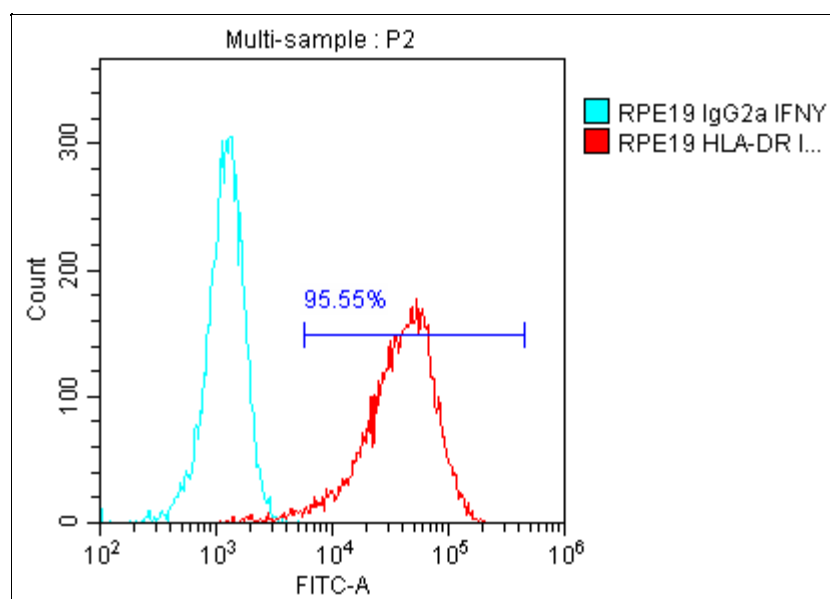

Supplement: Data_Sheet_2.ZIP [file Data_Sheet_2.ZIP]

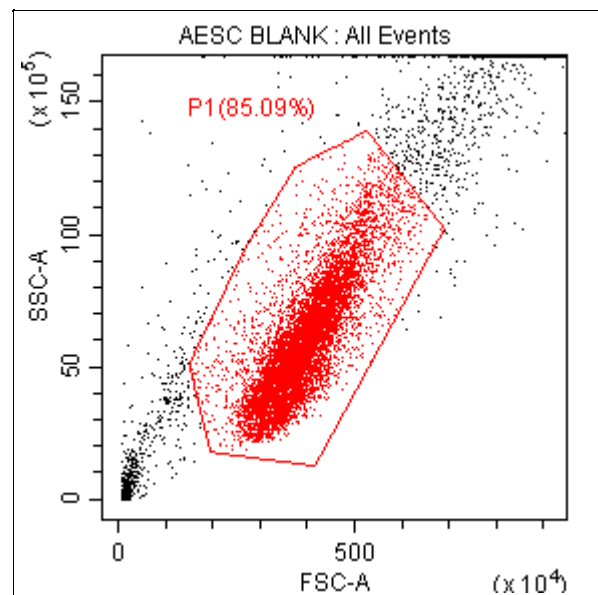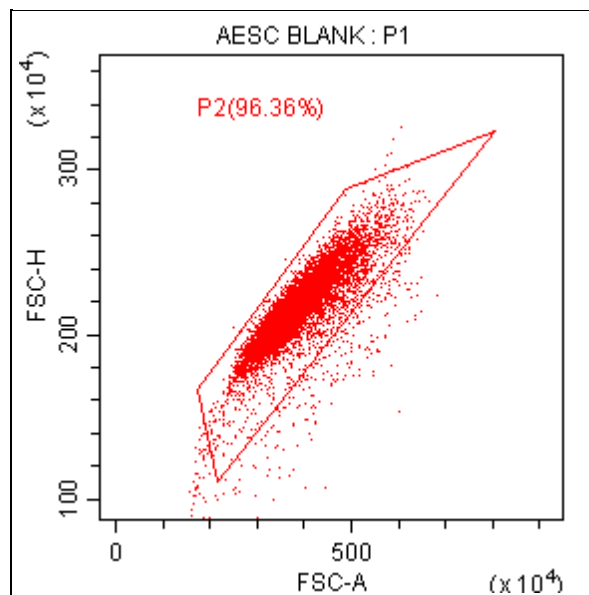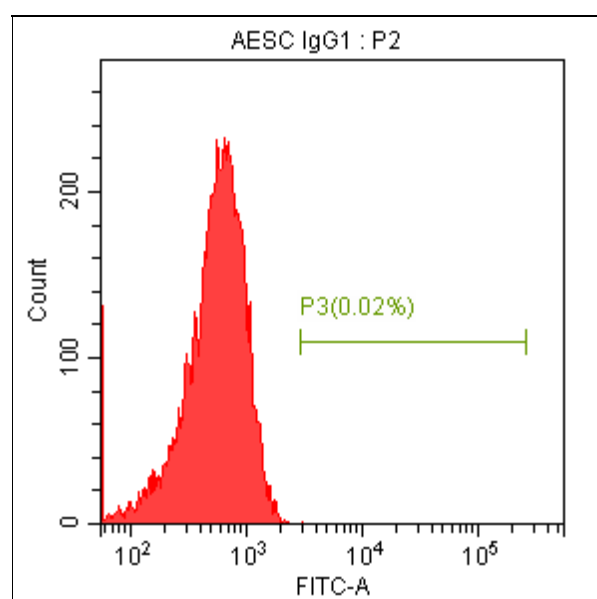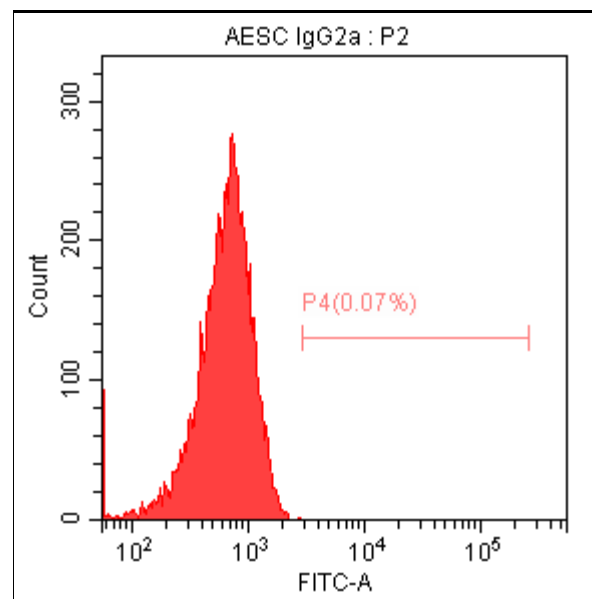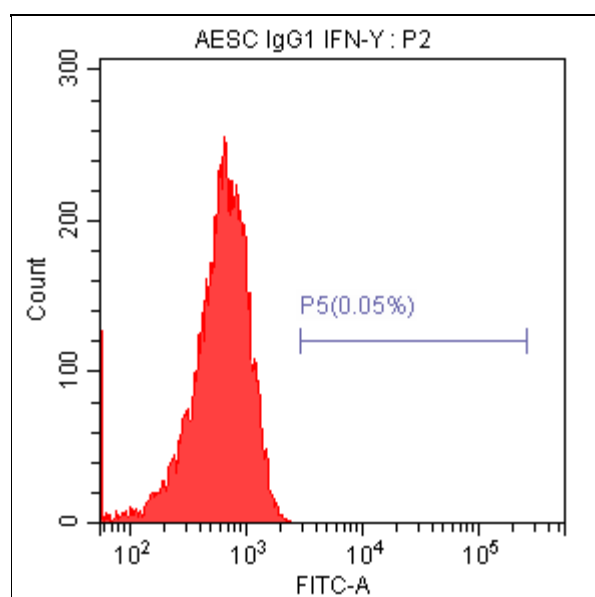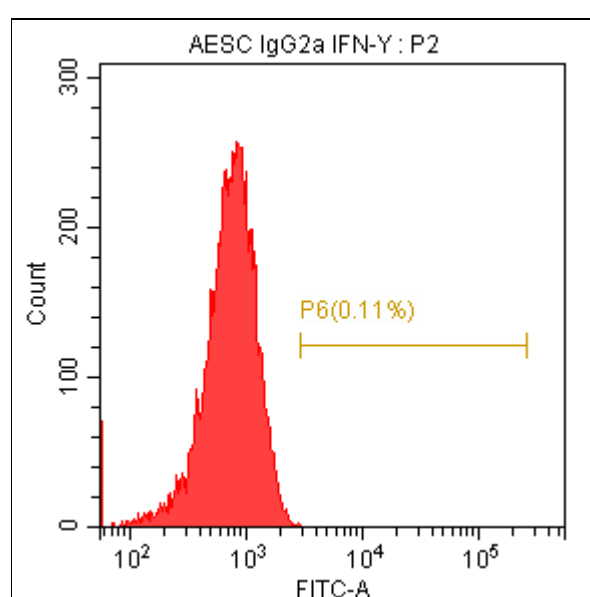

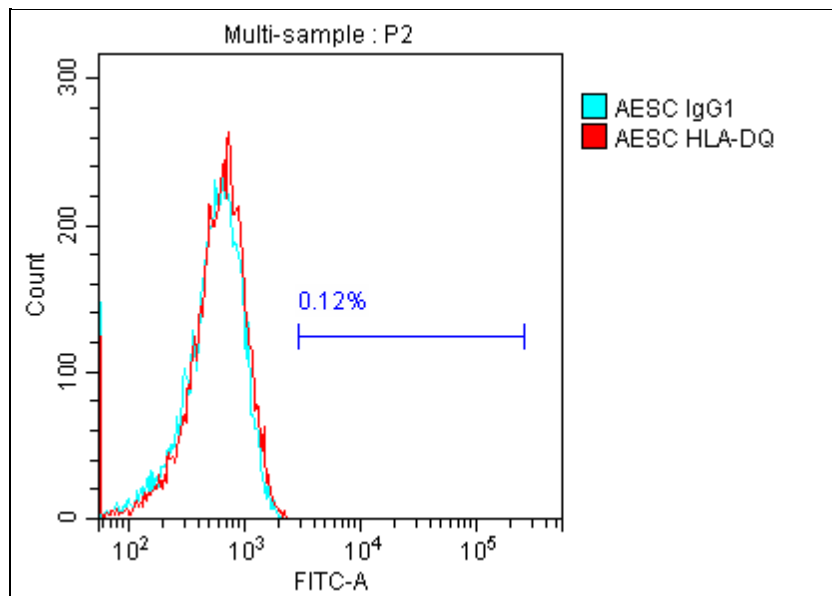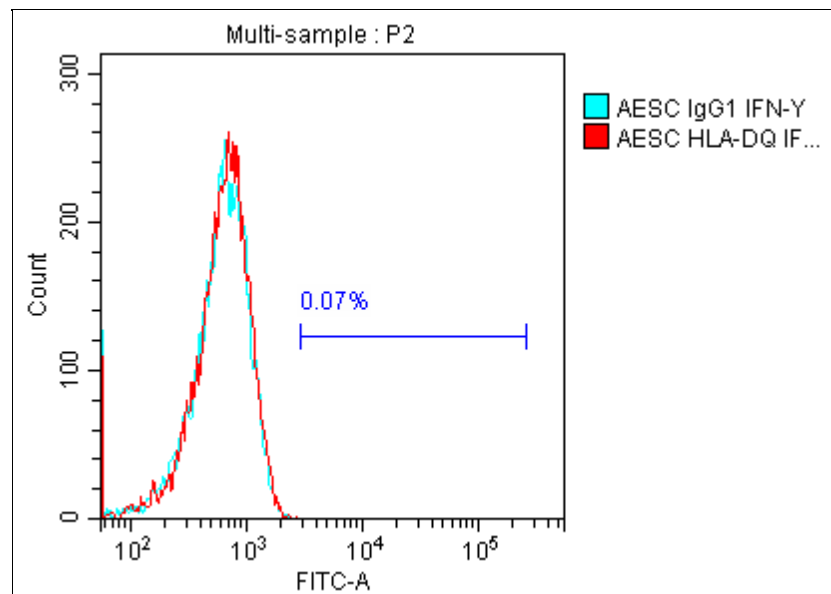

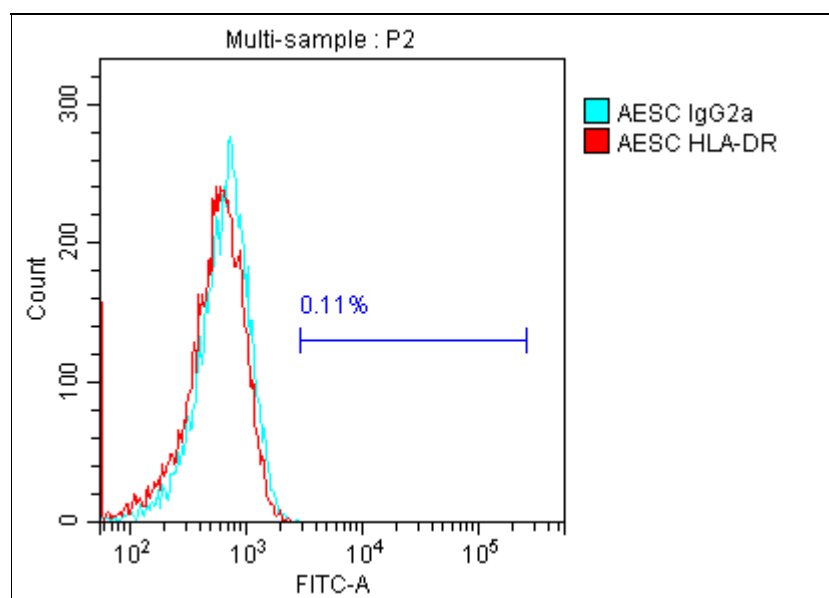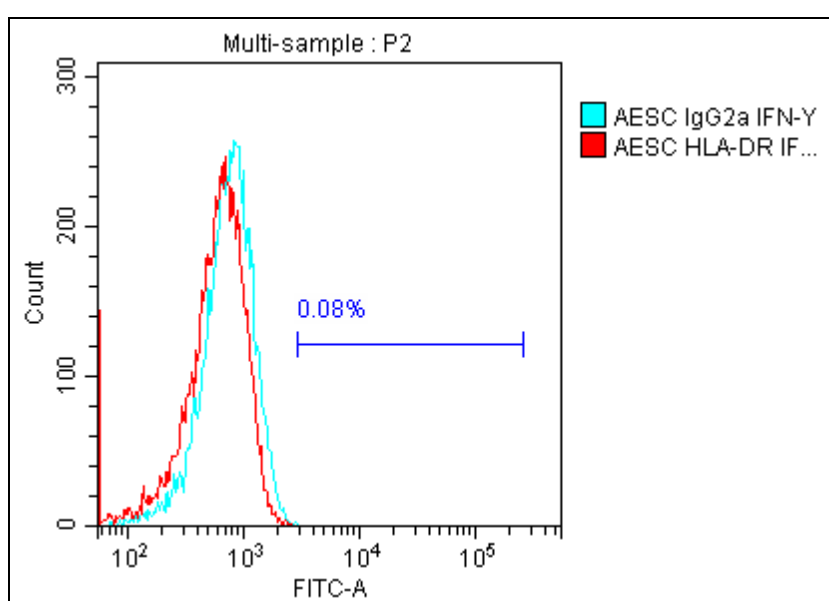

Supplement: Data_Sheet_2.ZIP [file Data_Sheet_2.ZIP]

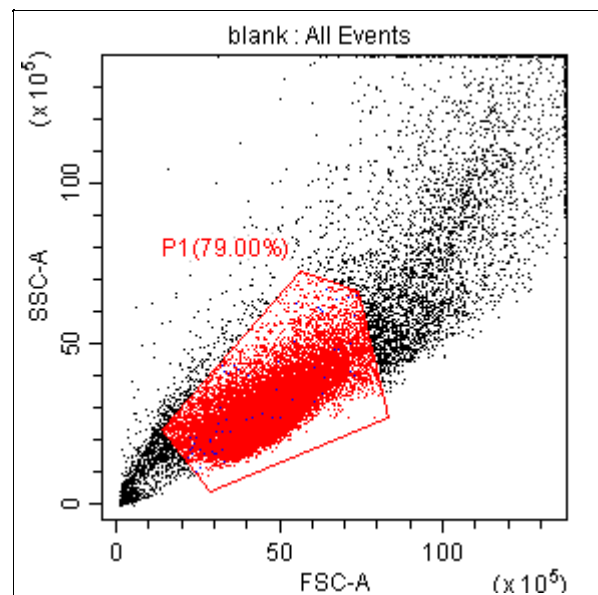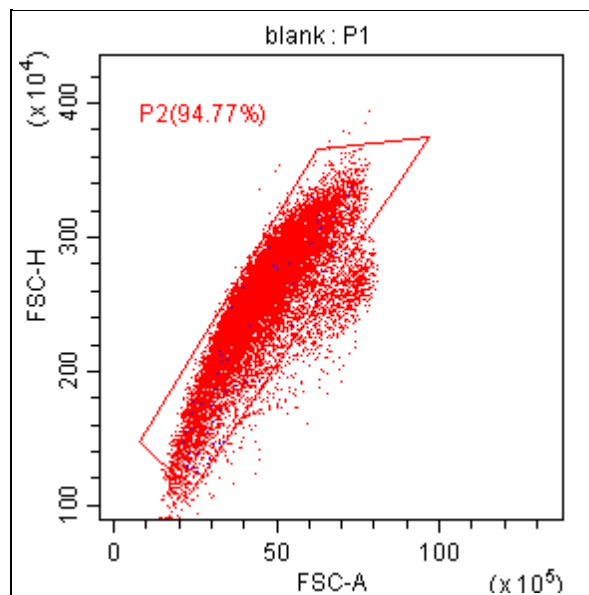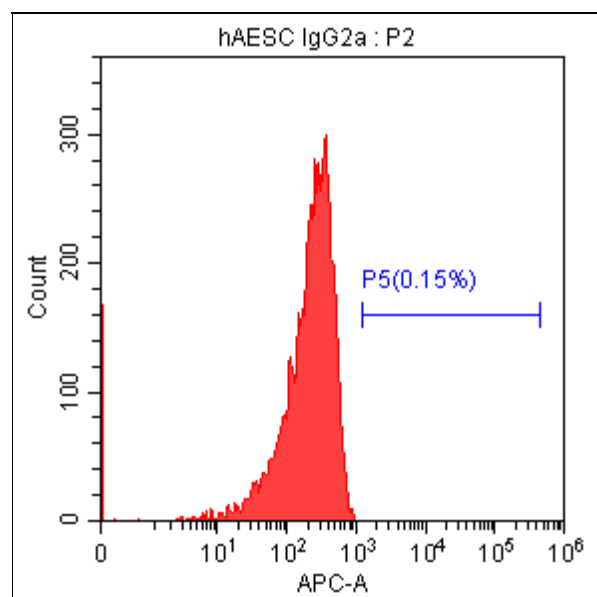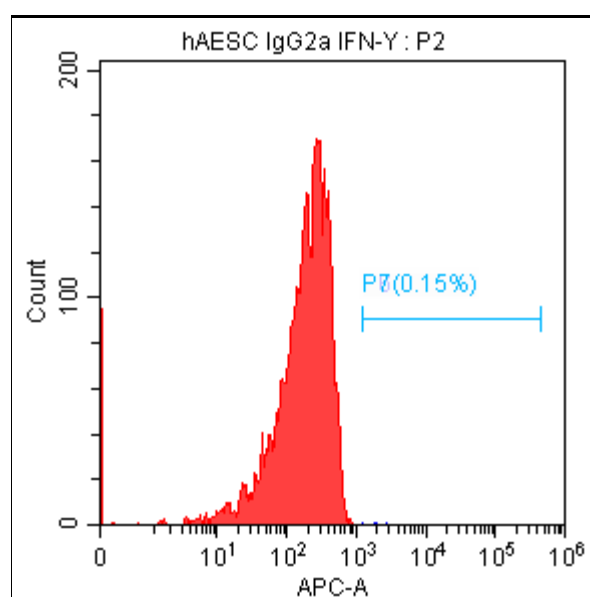

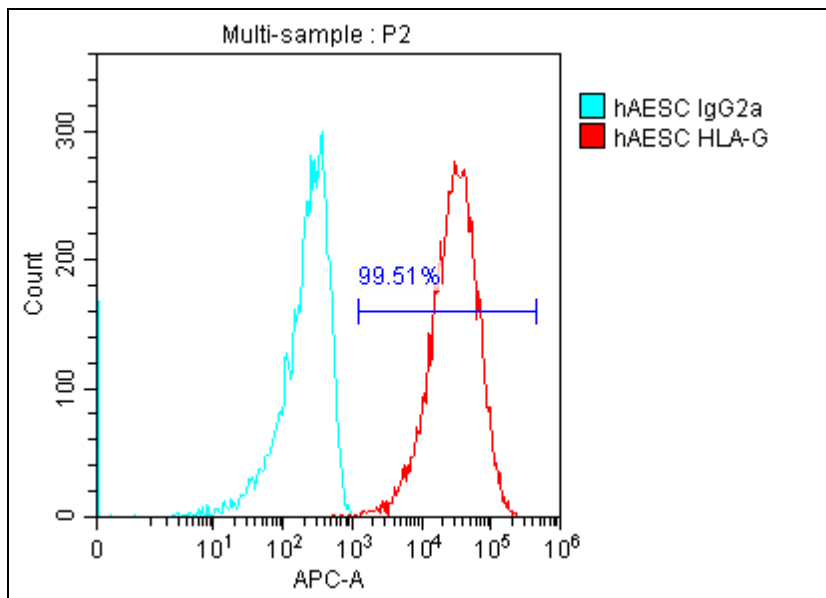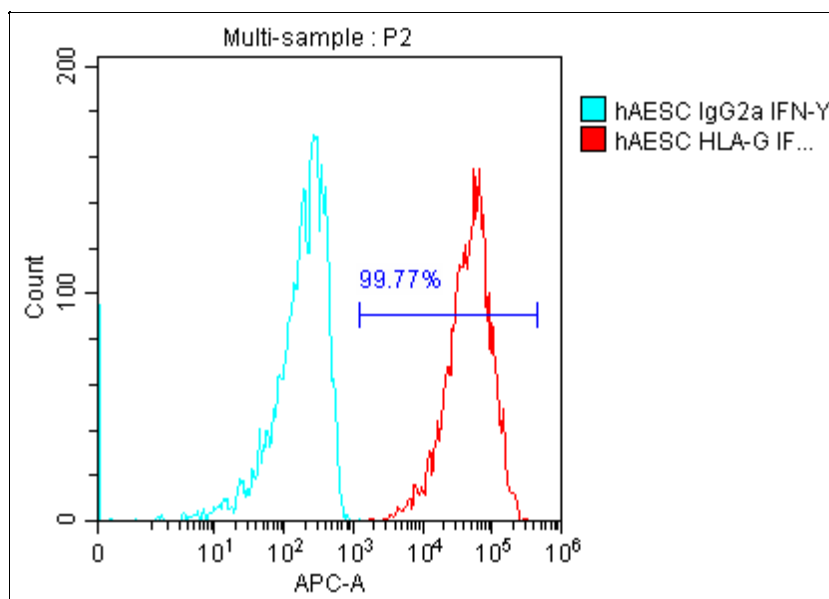

Supplement: Data_Sheet_2.ZIP [file Data_Sheet_2.ZIP]

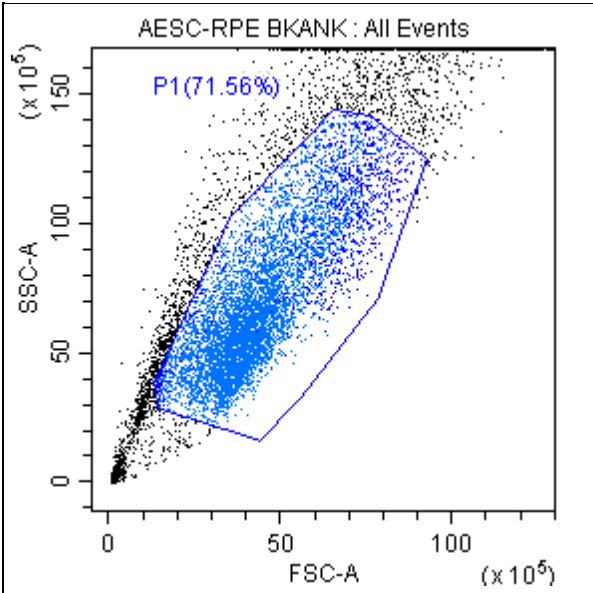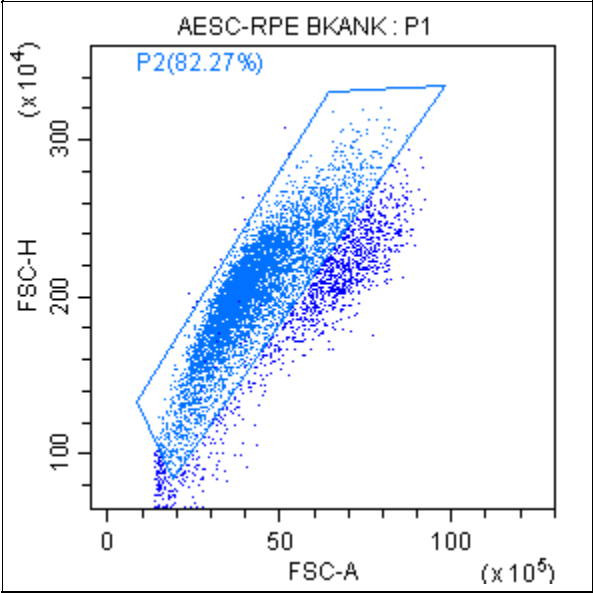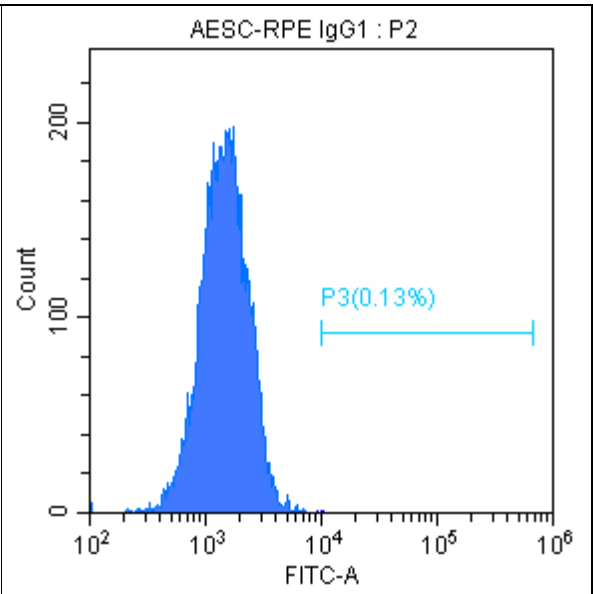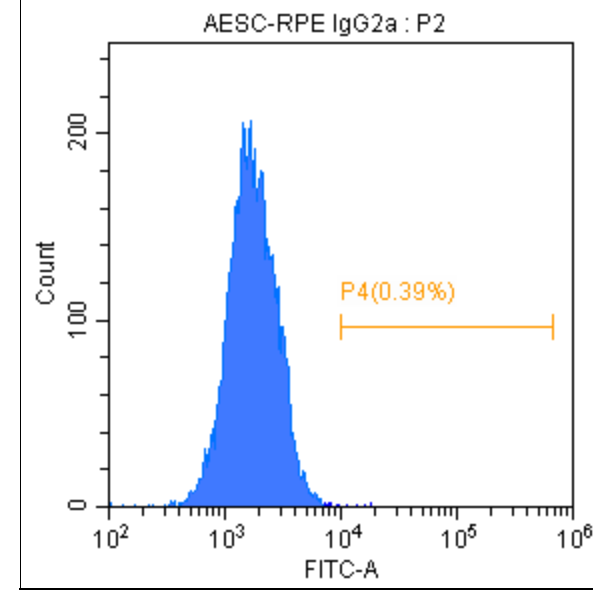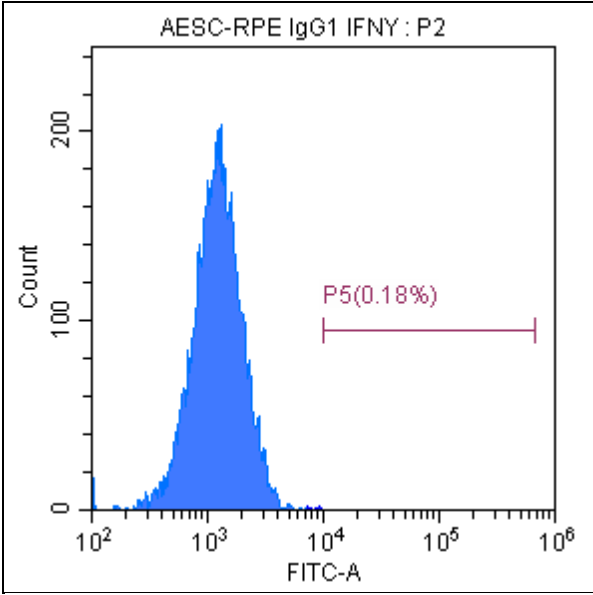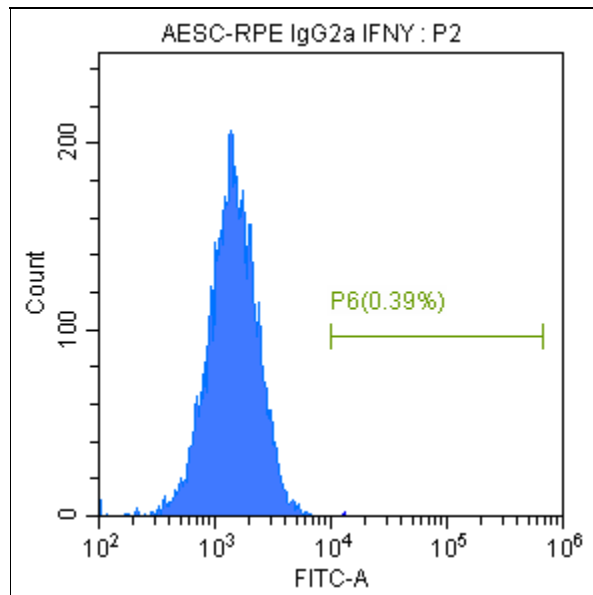

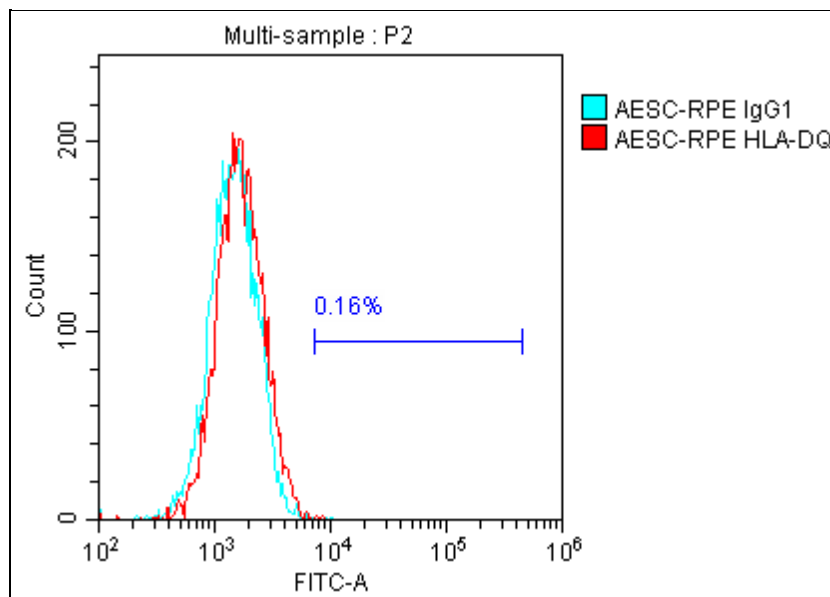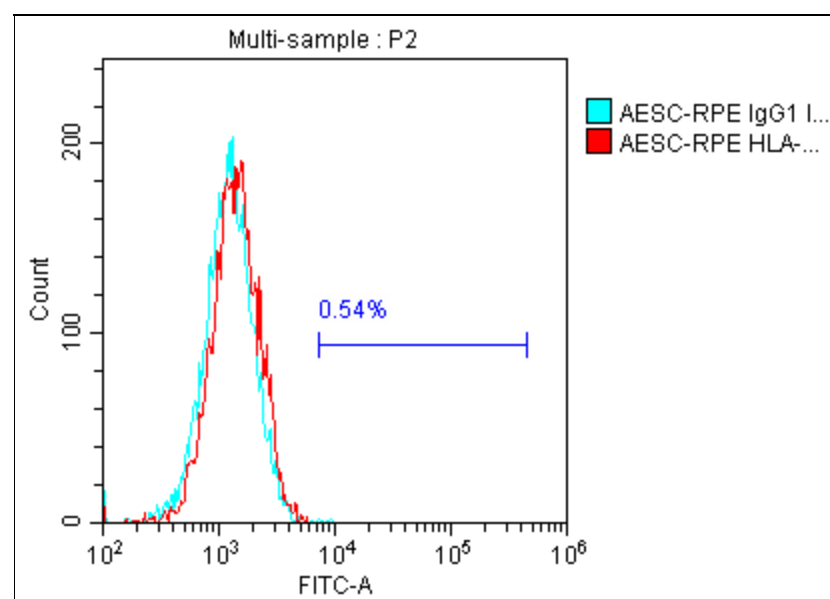

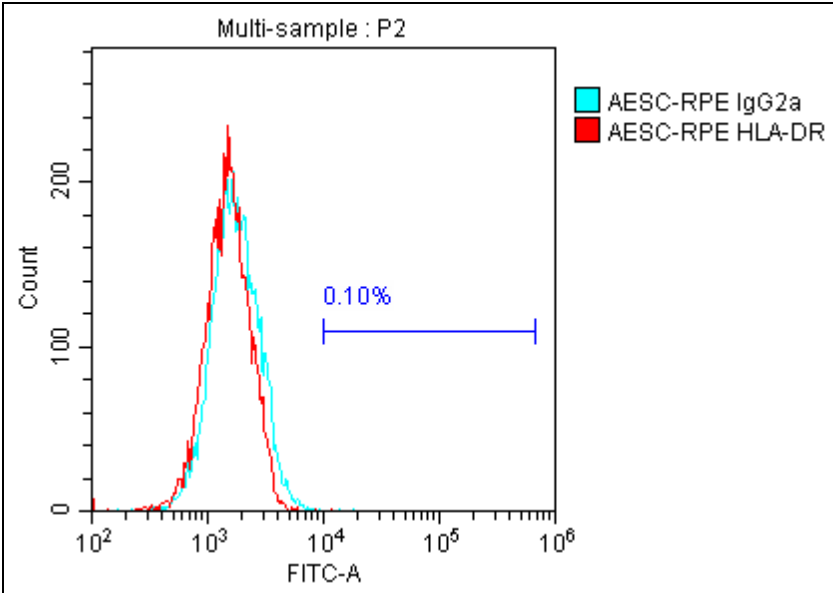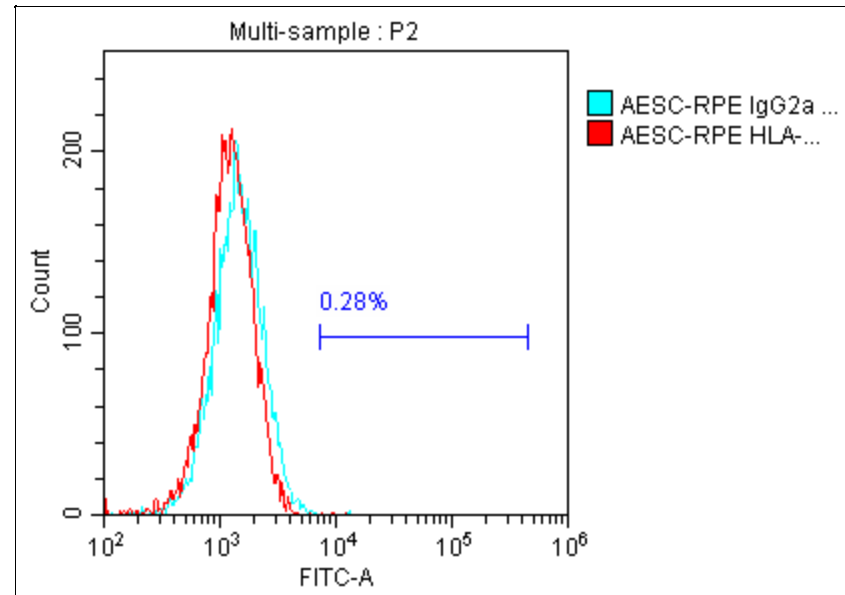

Supplement: Data_Sheet_2.ZIP [file Data_Sheet_2.ZIP]

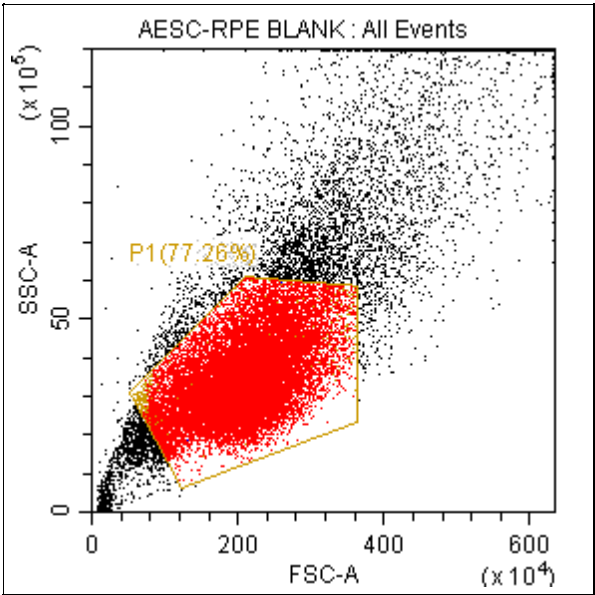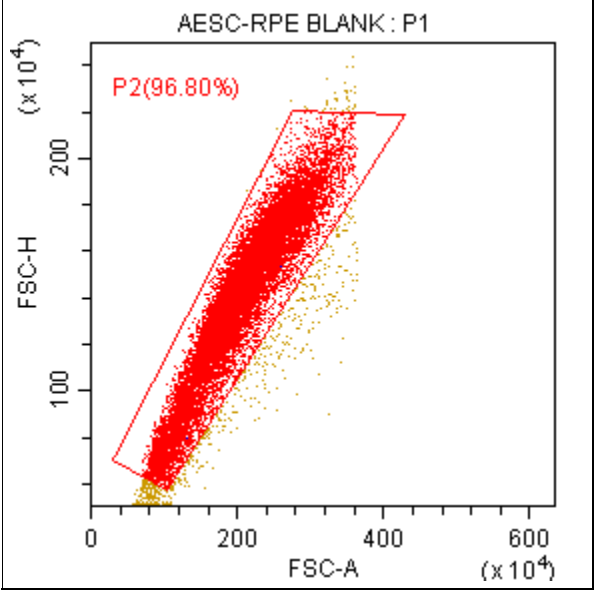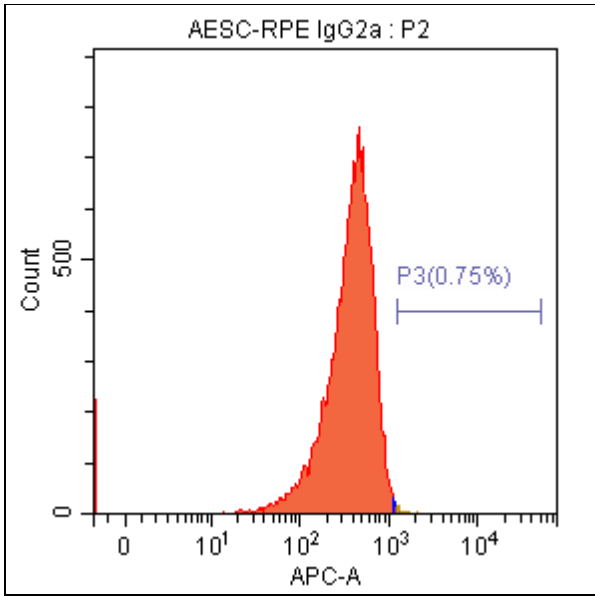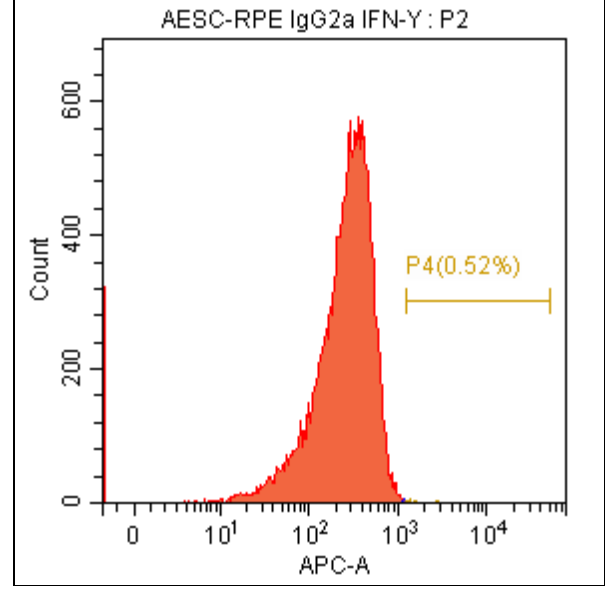

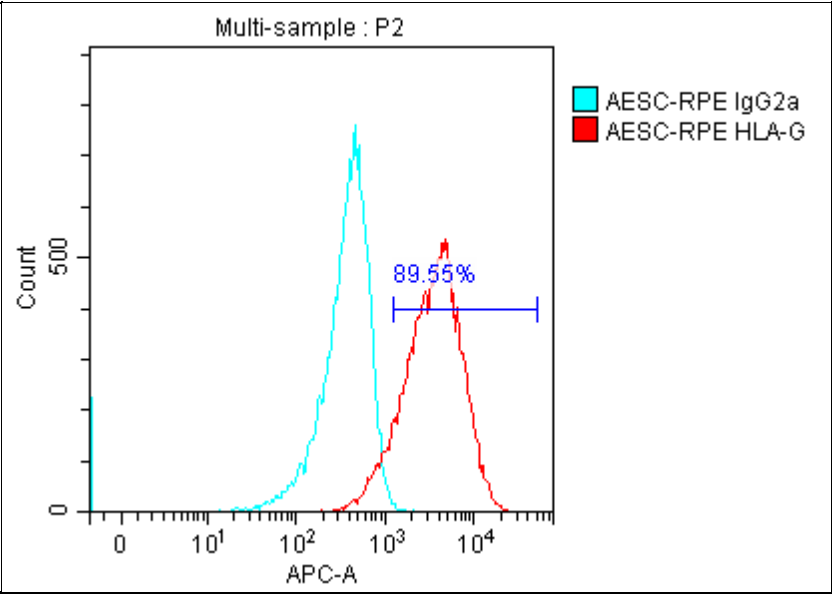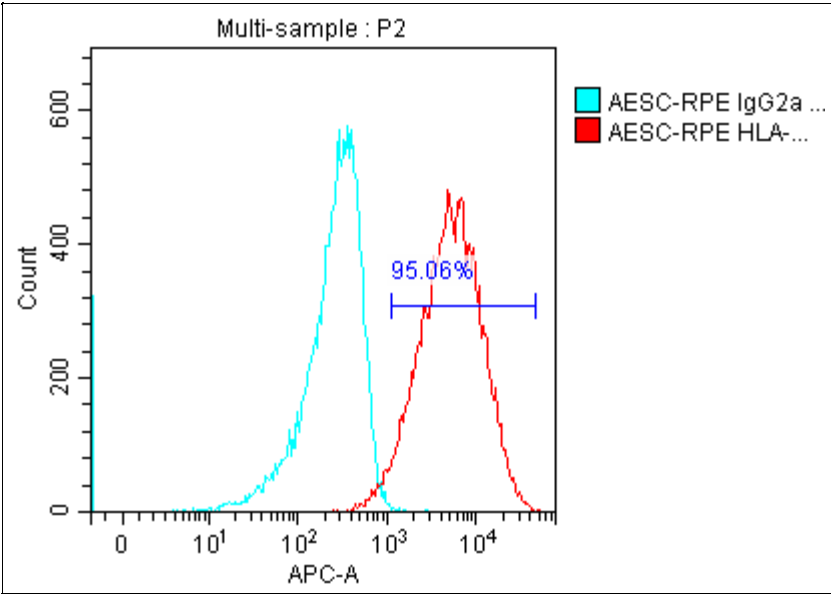

Supplement: Data_Sheet_2.ZIP [file Data_Sheet_2.ZIP]

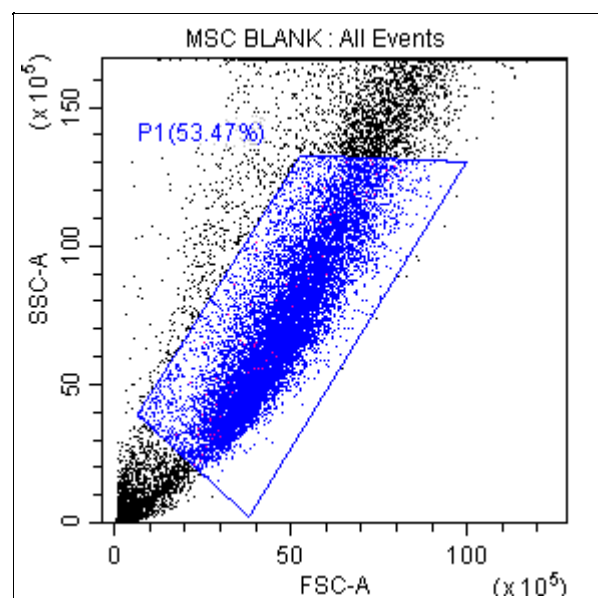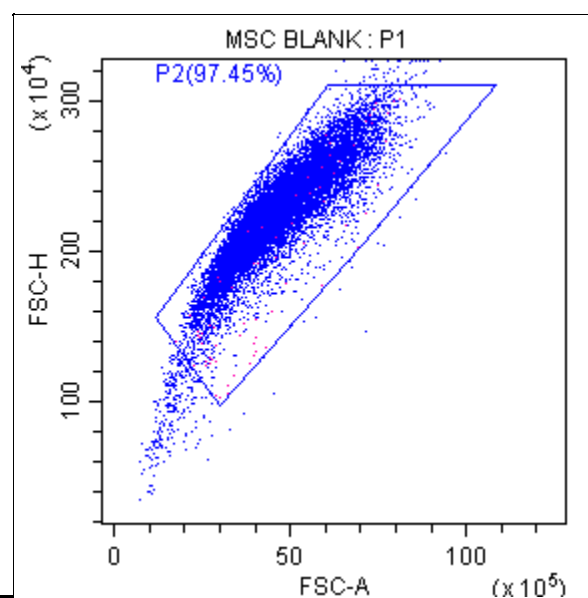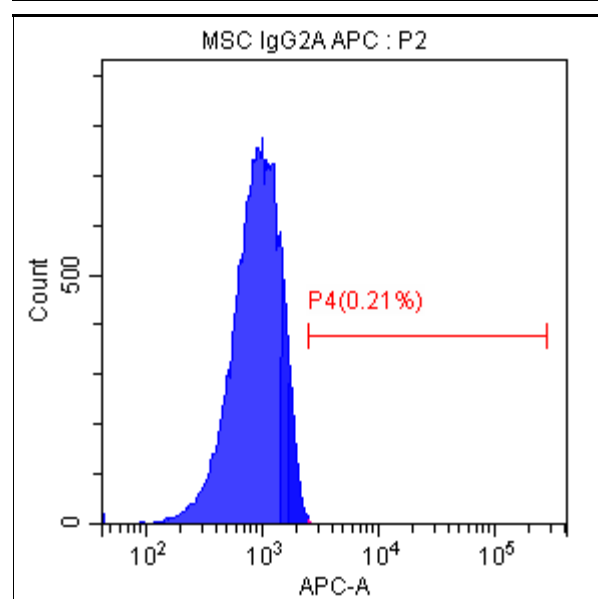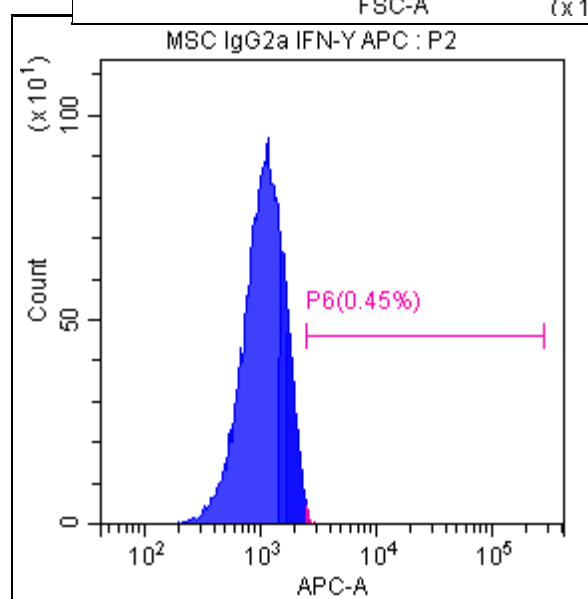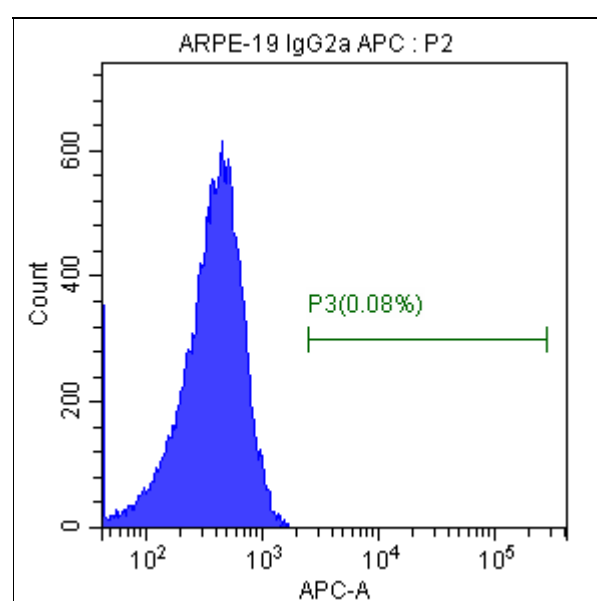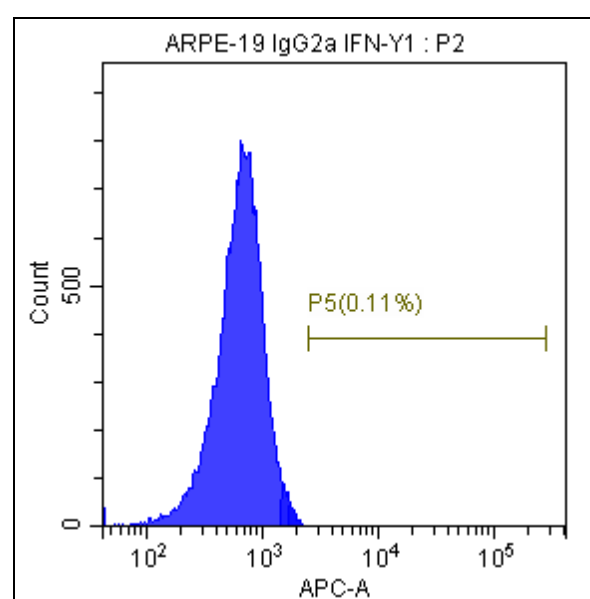

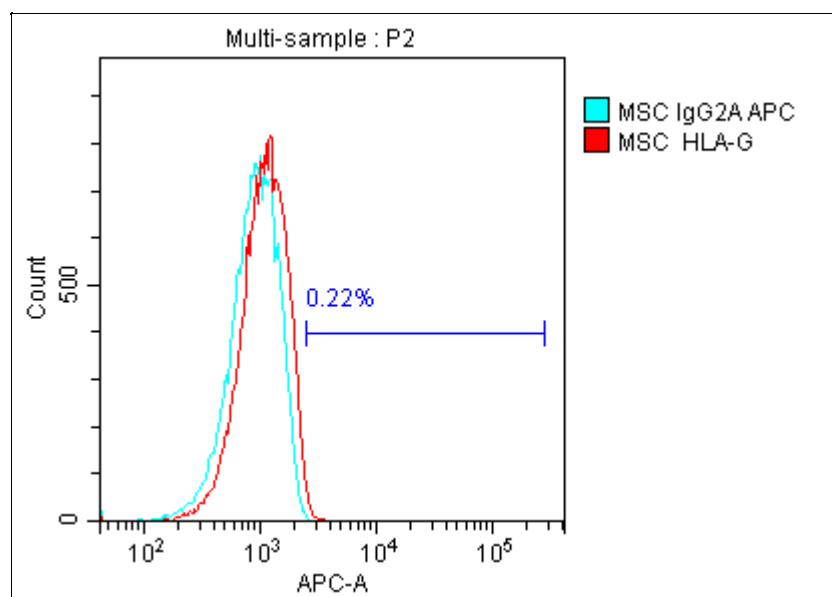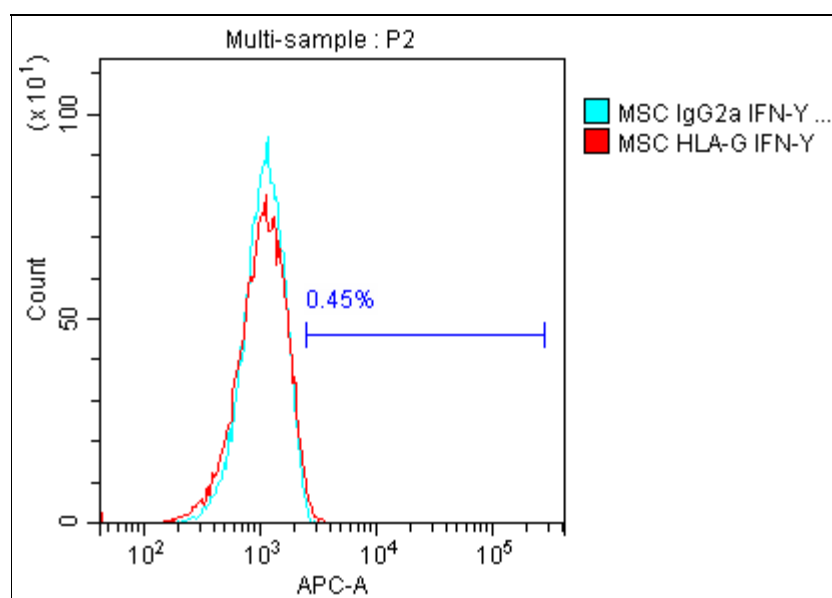

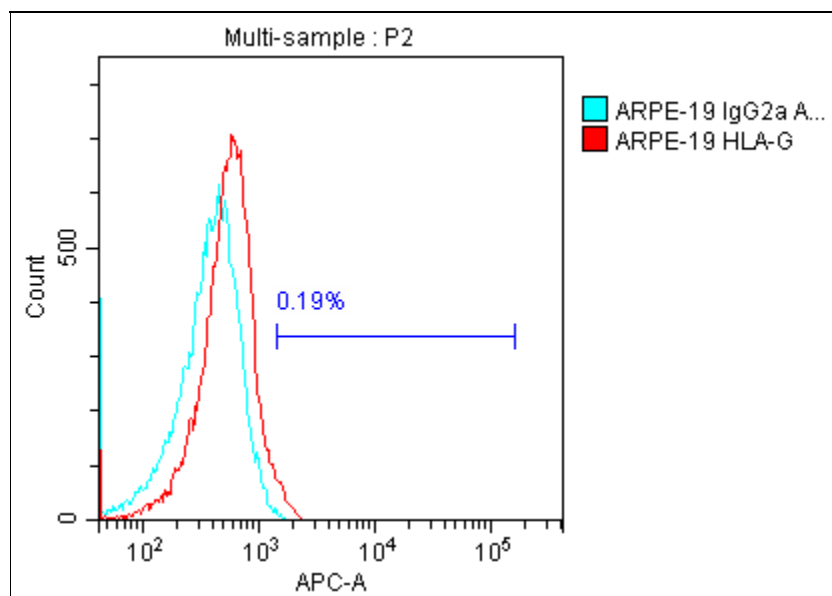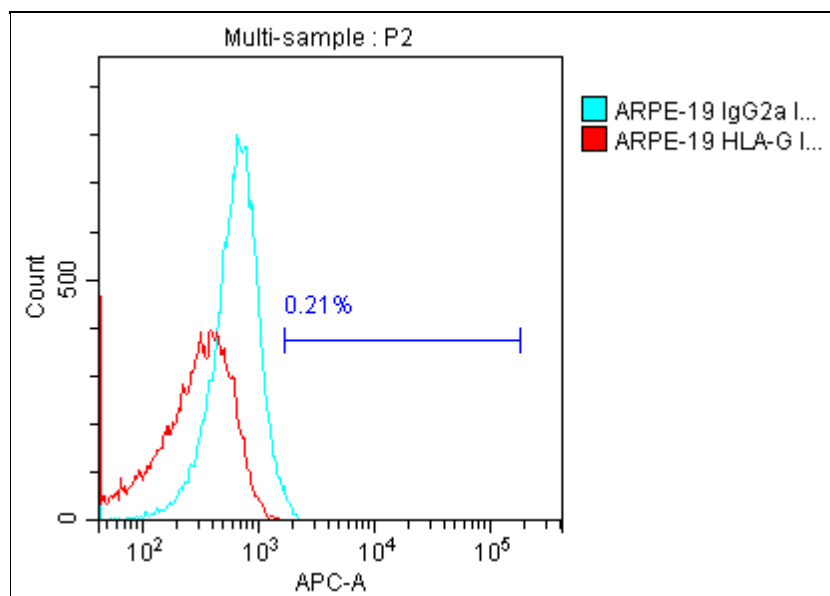

Supplement: Data_Sheet_2.ZIP [file Data_Sheet_2.ZIP]
